# Supplementary material for: Characterization of nanozyme kinetics for highly sensitive detection
Source: Royal Society of Chemistry journal article supplement (doi:10.1039/d4an00250d), 2024-01-01
Supplement: d4an00250d1.pdf [file d4an00250d1.pdf]

## Electronic Supplementary information

### Characterization of nanozyme kinetics for highly sensitive detection

Vasily G. Panferov,<sup>a</sup> Xiaoqin Wang,<sup>a</sup> and Juewen Liu<sup>a</sup>

<sup>a</sup>. Department of Chemistry, Waterloo Institute for Nanotechnology, University of Waterloo, Waterloo, Ontario, N2L 3G1, Canada.

#### Contents

|                                                                      |    |
|----------------------------------------------------------------------|----|
| S1. Materials and Methods .....                                      | 2  |
| S2. Michaelis–Menten constants for nanozymes .....                   | 4  |
| S3. Michaelis–Menten constants for HRP .....                         | 11 |
| S4. Effect of the substrate concentration on the reaction rate ..... | 12 |
| S5. Bioanalytical applications of nanozymes .....                    | 13 |
| S6. Nanozyme titration .....                                         | 47 |
| References .....                                                     | 49 |

## **S1. Materials and Methods**

All alkalis, acids, salts for buffers,  $\text{HAuCl}_4$ ,  $\text{Na}_2\text{PtCl}_6$ , trisodium citrate, ascorbic acid sodium salt, horseradish peroxidase (HRP), 3,3',5,5'-tetramethylbenzidine (TMB), and 30%  $\text{H}_2\text{O}_2$  were purchased from Sigma Aldrich (Oakville, ON, Canada). Monoclonal antibodies against hepatitis B surface antigen (catalog number ABHBS-0404 and ABHBS-0406) and recombinant hepatitis B surface antigen (catalog number – AGHBS-0120) were purchased from Arista Biologicals (Allentown, PA, USA).

### **Synthesis, characterization and conjugation of nanoparticles**

$\text{Au@Pt}$  nanozyme was synthesized by overgrowth of the platinum layer over gold nanoparticle seeds. First, gold nanoparticles were synthesized by reducing of  $\text{HAuCl}_4$  with trisodium citrate<sup>1</sup>. As synthesized gold nanoparticles were centrifuged (18 000 g, 20 min), and the pellets were dispersed in the same volume of Milli-Q water. Gold nanoparticles were mixed with  $\text{Na}_2\text{PtCl}_6$  (final concentration equal to 1 mM) and incubated for 5 min at 80°C. Ascorbic acid sodium salt solution (stock solution 50 mM, final concentration equal to 5 mM) was added using a peristaltic pump (rate 200  $\mu\text{L}/\text{min}$ ). After adding ascorbic acid sodium salt solution,  $\text{Au@Pt}$  nanoparticles were incubated for 20 min at 80°C.

For the conjugation with monoclonal antibodies,  $\text{Au@Pt}$  nanoparticles were centrifuged (15 000g, 15 min), and the pellets were dispersed in the same volume of Milli-Q water. The pH value of  $\text{Au@Pt}$  nanoparticles was adjusted to 8.5 by 0.5 M  $\text{Na}_2\text{CO}_3$ .  $\text{Au@Pt}$  with adjusted pH were mixed with monoclonal antibodies (ABHBS-0404). The final concentration of monoclonal antibodies was 15  $\mu\text{g}/\text{mL}$ . The mixture was incubated for two hours with continuous mixing. The remaining free surface on  $\text{Au@Pt}$  was blocked by bovine serum albumin (final concentration 2 mg/mL).  $\text{Au@Pt}$  were centrifuged (12 000g, 15 min), and the pellets were dispersed in 50 mM Tris buffer supplemented with 0.05% Triton X-100, pH 8.0. The synthesized conjugate was stored at 4°C and used within a week after the synthesis.

Characterization of  $\text{Au@Pt}$  nanoparticles was performed using a JEOL JEM F200 transmission electron microscope.

### **Measurement of kinetic parameters**

For the kinetic measurements, a Tecan Spark microplate reader was used. All measurements were performed in three repeats, and the temperature was stabilized at 30°C. HRP (50 ng/mL) in 20 mM MES buffer, pH = 6.0, and  $\text{Au@Pt}$ -mAb (1:100 dilution) in 20 mM sodium acetate buffer, pH = 4.0 were used. For the kinetic measurements, the concentrations of TMB (0.1-2 mM) and  $\text{H}_2\text{O}_2$  (0.02 -4000 mM) varied. The substrate solution was mixed with  $\text{Au@Pt}$  or HRP, and the optical density at 650 nm was recorded every 5 s over 5 min. The initial rate was calculated as the slope of the linear fit ( $R^2 \geq 0.98$ ). The Michaelis-Menten kinetic model was used to calculate the Michaelis-Menten and inhibitory constants using Origin Pro 2021 software (OriginLab, Northampton, MA, USA).

### **Microplate immunoassays**

Monoclonal antibodies (ABHBS-0406) were diluted with 50 mM sodium phosphate buffer saline (PBS), pH = 7.5. An aliquot (100  $\mu$ L) of antibodies was added to the microplate wells (Corning Costar, polystyrene flat bottom, medium binding) and incubated for two hours at 37°C. The microplate was washed five times with PBS supplemented with 0.05% Triton X-100 (PBST). Then, hepatitis B surface antigen in PBST (100  $\mu$ L) was added and incubated for one hour at 37°C. After washing the microplate with PBST, an aliquot of mAb-Au@Pt (1:150 dilution in PBST, 100  $\mu$ L) was added and incubated for one hour at 37°C. The microplate was washed with PBST, and the aliquot (100  $\mu$ L) of the substrate solution was added. Twelve various substrates solutions were tested – (1) 0.2 mM TMB and 5 mM H<sub>2</sub>O<sub>2</sub>, (2) 0.2 mM TMB and 500 mM H<sub>2</sub>O<sub>2</sub>, (3) 0.2 mM TMB and 1000 mM H<sub>2</sub>O<sub>2</sub>, (4) 0.5 mM TMB and 5 mM H<sub>2</sub>O<sub>2</sub>, (5) 0.5 mM TMB and 500 mM H<sub>2</sub>O<sub>2</sub>, (6) 0.5 mM TMB and 1000 mM H<sub>2</sub>O<sub>2</sub>, (7) 1 mM TMB and 5 mM H<sub>2</sub>O<sub>2</sub>, (8) 1 mM TMB and 500 mM H<sub>2</sub>O<sub>2</sub>, (9) 1 mM TMB and 1000 mM H<sub>2</sub>O<sub>2</sub>, (10) 1.5 mM TMB and 5 mM H<sub>2</sub>O<sub>2</sub>, (11) 1.5 mM TMB and 500 mM H<sub>2</sub>O<sub>2</sub>, (12) 1.5 mM TMB and 1000 mM H<sub>2</sub>O<sub>2</sub>. After 10 min of substrate incubation, 50  $\mu$ L of 2 M H<sub>2</sub>SO<sub>4</sub> was added, and optical density at 450 nm was recorded. As the negative control not-spiked PBST was used. The LOD values were determined as the hepatitis B surface antigen concentration higher than the mean value of the negative control plus its three standard deviations. All measurements were performed in three repeats.

## S2. Michaelis–Menten constants for nanozymes

**Table S1.** The values of the Michaelis–Menten constants ( $K_m$ ) for TMB and  $H_2O_2$  for peroxidase-mimicking nanozymes.

| Nanozyme Material          | $K_m$ for TMB (mM) | $K_m$ for $H_2O_2$ (mM) | Ref. |
|----------------------------|--------------------|-------------------------|------|
| Ag                         | 0.19               | 7.61                    | 2    |
| Au-PEG                     | 0.155              | 191                     | 3    |
| Au-citrate                 | 0.134              | 213                     |      |
| Au                         | 0.094              | 272.78                  | 4    |
| Au                         | 0.057              | 17.3                    | 5    |
| Au                         | 3.59               | 16.71                   | 6    |
| Au                         | 0.097              | 199.4                   | 7    |
| Au                         | 0.00253            | 25.3                    | 8    |
| Au                         | 0.0411             | 167                     | 9    |
| Au                         | 0.00664            | 2.46                    | 10   |
| Au                         | 0.0112             | 33                      | 11   |
| Au                         | 0.2                | 572.98                  | 12   |
| $\beta$ -casein-Au, 8.7 nm | 0.035              | 191                     | 13   |
| $\beta$ -casein-Au, 4.2 nm | 0.023              | 130                     |      |
| $\beta$ -casein-Au, 2.8 nm | 0.055              | 142                     |      |
| Cu                         | 0.648              | 29.16                   | 14   |
| Cu                         | 0.543              | 32.87                   | 15   |
| Cu                         | 1.047              | 31.265                  | 16   |
| Fe                         | 0.35               | 0.65                    | 17   |
| Apo ferritin-Fe            | 0.73               | 6.7                     | 18   |
| Ir                         | 0.02               | 266                     | 19   |
| Ir                         | 0.03               | 18.2                    | 20   |
| Glutathione -Pd 1.4 nm     | 0.045              | 254                     | 21   |
| Glutathione -Pd 2.6 nm     | 0.068              | 156                     |      |
| Glutathione -Pd 3.5 nm     | 0.08               | 137                     |      |
| Pd                         | 0.1098             | 4.398                   | 22   |
|                            | 0.195              | 23                      | 23   |
| Pt                         | 0.1206             | 205.6                   | 24   |
| Pt                         | 0.096              | 3.07                    | 25   |
| Pd                         | 0.054              | 700                     | 26   |
| Pt                         | 0.42               | 84.07                   | 27   |
| Pt 3.3. nm                 | 0.03               | 88.7                    | 28   |
| Pt 3.6 nm                  | 0.792              | 73.6                    |      |
| Pt-apoferritin             | 0.22               | 187.2                   | 29   |
| Pt                         | 0.119              | 41.8                    | 30   |
| Apo ferritin-Pt            | 0.52               | 1.09                    | 18   |
| Pt                         | 0.054              | 14.18                   | 31   |

|                                                        |         |        |    |
|--------------------------------------------------------|---------|--------|----|
| Pt                                                     | 0.0186  | 155    | 32 |
| DNA-Pt, 2.1 nm                                         | 0.0329  | 74.4   | 33 |
| DNA-Pt, 2.9 nm                                         | 0.056   | 48     |    |
| DNA-Pt, 1.8 nm                                         | 0.0162  | 117.2  |    |
| Pt                                                     | 0.052   | 63.86  | 34 |
| Pt                                                     | 0.1274  | 1.14   | 35 |
| Rh                                                     | 0.198   | 0.38   | 36 |
| Ru                                                     | 0.234   | 2.206  | 37 |
| Ru                                                     | 0.0603  | 318    | 38 |
| Au-Ag                                                  | 0.396   | 94.7   | 39 |
| Au@Ag@Pt                                               | 0.130   | 0.0583 | 40 |
| Au@Pt                                                  | 0.3     | 10.67  | 41 |
| Au@Pt                                                  | 0.026   | 219    | 42 |
| Au@Pt                                                  | 0.041   | 6.85   | 43 |
| Au@PtCu                                                | 0.036   | 23     | 42 |
| Fe <sub>0.5</sub> Co <sub>0.5</sub>                    | 1.79    | 0.06   | 44 |
| Fe                                                     | 0.38    | 0.32   | 44 |
| Co                                                     | 5.09    | 1.14   | 44 |
| Apo ferritin-Fe-Pt                                     | 0.16    | 0.95   | 18 |
| FePt-Au                                                | 0.445   | 0.0185 | 45 |
| NiPd                                                   | 0.11    | 0.66   | 46 |
| Pd-Ir                                                  | 0.13    | 340    | 26 |
| Pd@Pt                                                  | 0.0865  | 2.231  | 22 |
| PtPd                                                   | 1.78    | 0.053  | 47 |
| PtPd nanorods                                          | 1.62    | 0.05   | 48 |
| PtPd nanoparticles                                     | 0.22    | 6.41   |    |
| CoAl                                                   | 0.372   | 22.13  | 49 |
| CoAl layered double hydroxides                         | 1.775   | 10.24  | 50 |
| Cu(OH) <sub>2</sub>                                    | 1.335   | 0.379  | 51 |
| Cu(OH) <sub>2</sub>                                    | 2.448   | 0.199  | 52 |
| Ni(OH) <sub>2</sub>                                    | 0.023   | 1.76   | 53 |
| NiO                                                    | 0.018   | 1.77   |    |
| CeO <sub>2</sub>                                       | 0.046   | 64.6   | 54 |
| CeO <sub>2</sub>                                       | 0.147   | 293    | 55 |
| Fe- CeO <sub>2</sub>                                   | 0.176   | 47.6   | 56 |
| CeO <sub>2</sub>                                       | 0.0106  | 0.366  | 57 |
| H <sub>2</sub> TCP- CeO <sub>2</sub>                   | 0.0854  | 0.254  | 58 |
| CeO <sub>2</sub>                                       | 0.274   | 0.278  |    |
| CoFe <sub>2</sub> O <sub>4</sub> , 4.1 nm              | 0.00645 | 0.035  | 59 |
| CoFe <sub>2</sub> O <sub>4</sub> , 13.8 nm             | 0.05537 | 0.228  |    |
| CoFe <sub>2</sub> O <sub>4</sub> , 24.5 nm             | 0.01725 | 0.039  |    |
| CoFe <sub>2</sub> O <sub>4</sub> , 32.1 nm             | 0.02427 | 0.066  |    |
| CoFe <sub>2</sub> O <sub>4</sub> , 45.2 nm             | 0.03476 | 0.111  |    |
| Co <sub>x</sub> Fe <sub>3-x</sub> O <sub>4</sub> , CoO | 0.13    | 17.02  | 60 |

|                                                                    |         |        |    |
|--------------------------------------------------------------------|---------|--------|----|
| Co <sub>x</sub> Fe <sub>3-x</sub> O <sub>4</sub> , Co20            | 0.11    | 17.17  |    |
| Co <sub>x</sub> Fe <sub>3-x</sub> O <sub>4</sub> , Co40            | 0.12    | 18.38  |    |
| Co <sub>x</sub> Fe <sub>3-x</sub> O <sub>4</sub> , Co60            | 0.20    | 17.15  |    |
| Co <sub>3</sub> O <sub>4</sub>                                     | 0.037   | 140.07 | 61 |
| Co <sub>3</sub> O <sub>4</sub>                                     | 0.0562  | 34.38  | 62 |
| Co <sub>3</sub> O <sub>4</sub>                                     | 0.12    | 245    | 63 |
| Co <sub>3</sub> O <sub>4</sub>                                     | 0.01513 | 0.826  | 64 |
| Co <sub>3</sub> O <sub>4</sub> nanoplates                          | 0.09    | 284    | 65 |
| Co <sub>3</sub> O <sub>4</sub> nanorods                            | 0.22    | 455    |    |
| Co <sub>3</sub> O <sub>4</sub> nanocubes                           | 0.26    | 480    |    |
| Porphyrin- Co <sub>3</sub> O <sub>4</sub>                          | 0.0283  | 6.1    | 66 |
| Co <sub>3</sub> O <sub>4</sub>                                     | 0.32446 | 29.205 |    |
| CuO                                                                | 0.016   | 41     | 67 |
| CuO                                                                | 0.013   | 85.6   | 68 |
| CuO                                                                | 0.018   | 35.74  | 69 |
| Fe <sup>3+</sup> -polymer, calcination temp.400°C                  | 0.153   | 86.425 | 70 |
| Fe <sup>3+</sup> -polymer, calcination temp.450°C                  | 0.214   | 125.9  |    |
| Fe <sup>3+</sup> -polymer, calcination temp.500°C                  | 0.236   | 132.9  |    |
| Fe <sub>2</sub> O <sub>3</sub>                                     | 0.0887  | 157.19 | 71 |
| Fe <sub>3</sub> O <sub>4</sub>                                     | 0.099   | 50     | 72 |
| Fe <sub>3</sub> O <sub>4</sub>                                     | 0.45    | 18.71  | 73 |
| Fe <sub>3</sub> O <sub>4</sub>                                     | 0.836   | 23.466 | 74 |
| Fe <sub>3</sub> O <sub>4</sub>                                     | 0.098   | 154    | 75 |
| Porphyrin- Fe <sub>3</sub> O <sub>4</sub>                          | 0.439   | 0.919  | 76 |
| Fe <sub>3</sub> O <sub>4</sub>                                     | 0.0603  | 3.927  |    |
| Fe <sub>3</sub> O <sub>4</sub>                                     | 0.255   | 237    | 77 |
| Fe <sub>3</sub> O <sub>4</sub>                                     | 0.187   | 30     | 78 |
| Fe <sub>3</sub> O <sub>4</sub>                                     | 0.185   | 39     |    |
| LaCoO <sub>3</sub>                                                 | 0.24    | 15     | 79 |
| LaNiO <sub>3</sub>                                                 | 0.105   | 90.05  | 80 |
| MgFe <sub>2</sub> O <sub>4</sub>                                   | 0.67    | 4.61   | 81 |
| NiFe <sub>2</sub> O <sub>4</sub>                                   | 0.55    | 2.60   |    |
| Mn <sub>0.5</sub> Fe <sub>0.5</sub> Fe <sub>2</sub> O <sub>4</sub> | 0.139   | 310    | 82 |
| MoO <sub>3</sub>                                                   | 0.093   | 109.5  | 83 |
| NiO                                                                | 0.25    | 6.25   | 84 |
| RuO <sub>2</sub>                                                   | 0.236   | 212    | 85 |
| TiO <sub>2</sub>                                                   | 0.127   | 5.26   | 86 |
| VO <sub>2</sub>                                                    | 0.146   | 1.69   | 87 |
| CoS                                                                | 0.41    | 7.15   | 88 |
| Co <sub>9</sub> S <sub>8</sub>                                     | 1.64    | 7.39   | 89 |
| CuS                                                                | 0.064   | 1.753  | 90 |
| Cu <sub>1.8</sub> S                                                | 1.72    | 37.1   | 91 |

|                                                                |        |        |     |
|----------------------------------------------------------------|--------|--------|-----|
| FeS                                                            | 0.0082 | 9.36   | 92  |
| FeSe                                                           | 0.0089 | 8.09   |     |
| FeS                                                            | 0.008  | 7.67   | 93  |
| FeS                                                            | 0.13   | 7.2    | 94  |
| Fe <sub>3</sub> S <sub>4</sub>                                 | 0.16   | 1.158  | 95  |
| Fe <sub>7</sub> S <sub>8</sub>                                 | 0.548  | 0.895  | 96  |
| MoS <sub>2</sub>                                               | 0.0116 | 0.525  | 97  |
| MoS <sub>2</sub>                                               | 4.55   | 0.019  | 98  |
| MoS <sub>2</sub> -SDS                                          | 2.04   | 0.013  |     |
| MoS <sub>2</sub> -CTAB                                         | 6.92   | 0.022  |     |
| MoS <sub>2</sub>                                               | 0.232  | 3.66   | 99  |
| MoS <sub>2</sub>                                               | 0.005  | 0.01   | 100 |
| MoS <sub>2</sub>                                               | 0.163  | 0.767  | 101 |
| VS <sub>2</sub>                                                | 0.28   | 3.49   | 102 |
| WS <sub>2</sub>                                                | 0.467  | 0.926  | 103 |
| WS <sub>2</sub>                                                | 1.83   | 0.24   | 104 |
| ZnS                                                            | 0.054  | 0.1724 | 105 |
| AgVO <sub>3</sub>                                              | 8.03   | 14     | 106 |
| AgVO <sub>3</sub>                                              | 0.333  | 1.3    | 107 |
| BN                                                             | 0.157  | 10.88  | 108 |
| CeVO <sub>4</sub>                                              | 0.136  | 3.52   | 109 |
| Co <sub>4</sub> N                                              | 0.243  | 2.95   | 110 |
| Fe <sub>3</sub> H <sub>9</sub> (PO <sub>4</sub> ) <sub>6</sub> | 8.63   | 0.41   | 111 |
| FeP-Prussian Blue                                              | 0.0653 | 2.907  | 112 |
| FeSe                                                           | 0.04   | 13.2   | 113 |
| FeS                                                            | 0.08   | 7.44   |     |
| Indium tin oxide                                               | 0.26   | 5.47   | 114 |
| MnSe                                                           | 0.0348 | 87     | 115 |
| MoSe <sub>2</sub>                                              | 0.2168 | 2.53   | 116 |
| Prussian Blue                                                  | 0.76   | 840    | 117 |
| Prussian Blue                                                  | 0.337  | 14.7   | 118 |
| Prussian Blue                                                  | 0.91   | 7.82   | 119 |
| WC                                                             | 0.274  | 119.6  | 120 |
| WSe <sub>2</sub>                                               | 0.0433 | 19.53  | 121 |
| Ag@Fe <sub>3</sub> O <sub>4</sub>                              | 3.46   | 75.2   | 122 |
| Au@Ag-hemin-reduced graphene                                   | 0.048  | 2.75   | 123 |
| Au@hollow carbon                                               | 0.0323 | 210    | 124 |
| Au/CeO <sub>2</sub>                                            | 0.29   | 44.69  | 125 |
| Au@Cu <sub>x</sub> OS                                          | 0.265  | 0.159  | 126 |
| Au-Fe <sub>2</sub> O <sub>3</sub>                              | 0.0429 | 138.5  | 127 |
| Au-graphene                                                    | 0.29   | 274.22 | 128 |
| Au-graphene                                                    | 0.14   | 140.52 | 129 |
| Au-citrate-graphene                                            | 0.059  | 25.08  | 130 |
| Au-graphene                                                    | 0.38   | 26.42  |     |

|                                                               |        |        |     |
|---------------------------------------------------------------|--------|--------|-----|
| Au-citrate                                                    | 0.74   | 45.83  |     |
| Au-PVP-graphene                                               | 2.63   | 104    |     |
| Au-graphene oxide                                             | 0.16   | 142.39 | 131 |
| Au-mesoporous silica                                          | 0.0411 | 15.81  | 132 |
| Au@TiO <sub>2</sub>                                           | 1.09   | 0.29   | 133 |
| BN/CuS                                                        | 0.175  | 25     | 134 |
| Carbon dots/Fe <sub>3</sub> O <sub>4</sub>                    | 0.06   | 56.97  | 135 |
| CeO <sub>2</sub> /NiO                                         | 0.0832 | 56.2   | 136 |
| CoFe <sub>2</sub> O <sub>4</sub>                              | 0.046  | 14.72  | 137 |
| Co <sub>3</sub> O <sub>4</sub> -C <sub>3</sub> N <sub>4</sub> | 0.056  | 30.04  | 138 |
| Co <sub>3</sub> O <sub>4</sub> @CeO <sub>2</sub>              | 0.140  | 7.09   | 139 |
| Co <sub>3</sub> O <sub>4</sub> /graphene oxide                | 0.19   | 24.04  | 140 |
| Co <sub>3</sub> O <sub>4</sub>                                | 0.30   | 24.64  |     |
| Cu-Ag/ graphene oxide                                         | 0.634  | 8.6245 | 141 |
| Ag/ graphene oxide                                            | 0.8503 | 20.928 |     |
| Cu/ graphene oxide                                            | 1.05   | 26.332 |     |
| Cu-hemin                                                      | 1.42   | 2.18   | 142 |
| Cu@C                                                          | 1.65   | 1.89   | 143 |
| Cu-C <sub>3</sub> N <sub>4</sub>                              | 0.389  | 9.27   | 144 |
| CuO-C <sub>3</sub> N <sub>4</sub>                             | 0.9    | 1.05   | 145 |
| CuO/Pt                                                        | 0.413  | 2.887  | 146 |
| Fe <sub>3</sub> C-C <sub>3</sub> N <sub>4</sub>               | 0.25   | 38.42  | 147 |
| Fe@C                                                          | 0.1    | 114.4  | 148 |
| SiO <sub>2</sub> @Fe <sub>2</sub> O <sub>3</sub>              | 3.05   | 965.98 | 149 |
| Au                                                            | 0.0251 | 0.229  | 150 |
| Fe <sub>3</sub> O <sub>4</sub> @C                             | 0.072  | 0.38   | 151 |
| Fe <sub>3</sub> O <sub>4</sub> /N-C                           | 0.06   | 3.2    | 152 |
| Fe <sub>3</sub> O <sub>4</sub> @CeO <sub>2</sub>              | 0.15   | 1.13   | 153 |
| Fe <sub>3</sub> O <sub>4</sub> @SiO <sub>2</sub>              | 0.193  | 273    | 154 |
| Fe <sub>3</sub> O <sub>4</sub>                                | 0.173  | 185    |     |
| Fe <sub>3</sub> O <sub>4</sub> @SiO <sub>2</sub> @Au          | 5.71   | 2.05   | 155 |
| Fe-graphene oxide                                             | 0.76   | 0.36   | 156 |
| Graphene oxide-Fe <sub>2</sub> O <sub>3</sub>                 | 0.118  | 305    | 157 |
| Graphene oxide-Fe <sub>3</sub> O <sub>4</sub>                 | 0.43   | 0.71   | 158 |
| Graphene oxide-Fe <sub>3</sub> O <sub>4</sub> -Pt             | 2.37   | 3.56   | 159 |
| Pt                                                            | 1.47   | 3.30   |     |
| Graphene oxide-Fe                                             | 1.71   | 3.09   | 160 |
| Hemin-graphene                                                | 5.1    | 2.256  | 161 |
| MoS <sub>2</sub> /graphene oxide                              | 0.1    | 0.2    | 162 |
| MoS <sub>2</sub> - polypyrrole                                | 0.41   | 12.8   | 163 |
| MoS <sub>2</sub> -Pt <sub>74</sub> Ag <sub>26</sub>           | 25.71  | 0.386  | 164 |
| MoS <sub>2</sub> /PtCu                                        | 0.22   | 0.801  | 165 |
| Prussian Blue                                                 | 4.1    | 49.6   | 166 |
| Fe <sub>2</sub> O <sub>3</sub> @Prussian Blue                 | 0.307  | 323.6  | 167 |
| Prussian Blue                                                 | 5.23   | 19.22  | 168 |



|                                                  |         |          |     |
|--------------------------------------------------|---------|----------|-----|
| Pd-NiCl <sub>2</sub>                             | 0.28    | 10.82    | 169 |
| Pd/N-S                                           | 1.44    | 42.7     | 170 |
| Pt/CeO <sub>2</sub>                              | 0.26    | 0.21     | 171 |
| Pt-graphene oxide                                | 0.0806  | 935      | 172 |
| Pd-C                                             | 0.13    | 58.01    | 173 |
| Pt-CN                                            | 1.056   | 7.362    | 174 |
| Pt-GO                                            | 0.1864  | 221.4    |     |
| SiO <sub>2</sub> @Co <sub>3</sub> O <sub>4</sub> | 0.087   | 25.2     | 175 |
| Fe <sub>3</sub> O <sub>4</sub> @Pt               | 0.14    | 702.6    | 176 |
| Fe <sub>3</sub> O <sub>4</sub>                   | 0.485   | 1175.3   |     |
| Pt/GO                                            | 0.1864  | 221.1    | 177 |
| Pt                                               | 0.29    | 10.97    | 178 |
| Pt <sub>50</sub> Ag <sub>50</sub>                | 0.25    | 0.35     | 179 |
| Dealloyed Pt <sub>50</sub> Ag <sub>50</sub>      | 0.38    | 0.86     |     |
| Au@Pt                                            | 0.00243 | 0.004076 | 180 |
| ZnFe <sub>2</sub> O <sub>4</sub>                 | 0.85    | 1.66     | 181 |
| Pt                                               | 0.127   | 61.5     | 182 |
| Pd                                               | 0.12    | 1        | 183 |
| Pd@Pt                                            | 0.43    | 14       |     |
| Hollow Pt                                        | 0.81    | 6.9      |     |
| Ag <sub>3</sub> PO <sub>4</sub>                  | 0.327   | 0.216    | 184 |
| Fe-N-C single atom nanozyme                      | 0.3322  | 17.12    | 185 |
| Graphene quantum dots                            | 0.01    | 8        | 186 |
| Prussian Blue                                    | 0.178   | 3.29     | 187 |
| Pt                                               | 0.067   | 149      | 188 |
| Au <sub>2</sub> Pt <sub>1</sub>                  | 0.088   | 196      |     |
| Pt                                               | 0.0995  | 230.8    | 189 |
| C <sub>60</sub> -carboxyfullerenes               | 0.2333  | 24.58    | 190 |
| Pd-Pt                                            | 3.11    | 33.4     | 191 |
| Au                                               | 0.23    | 0.16     | 192 |
| Au                                               | 0.27    | 0.20     |     |
| Au                                               | 0.58    | 0.41     |     |
| Nanodiamonds                                     | 0.103   | 0.752    | 193 |
| Au                                               | 0.18880 | 113      | 194 |
| Gum Arabic-Au                                    | 0.0942  | 84       |     |
| PVP-Au                                           | 0.0551  | 96       |     |
| Citrate Au                                       | 0.0493  | 151      |     |
| Cysteamine-Au                                    | 0.0528  | 213      |     |
| Au@Pt                                            | 0.285   | 0.341    | 195 |
| Fe-tannic acid                                   | 0.152   | 3.50     | 196 |
| Cu-PDA                                           | 0.172   | 0.130    | 197 |
| CuCo@PDA                                         | 0.8     | 17.3     | 198 |
| Fe-N-C single atom nanozyme                      | 0.052   | 0.191    | 199 |

|                         |       |       |     |
|-------------------------|-------|-------|-----|
| Au@Pd                   | 0.45  | 5.53  | 200 |
| Au@Pd@Pt                | 0.065 | 4.59  | 201 |
| Fe-N-C single atom      | 0.08  | 28.3  | 202 |
| Pt-Ir                   | 0.38  | 4.13  | 203 |
| Fe-single atom nanozyme | 0.24  | 16.28 | 204 |
| FeOOH                   | 0.41  | 4.08  | 205 |

### S3. Michaelis–Menten constants for HRP

**Table S2.** The values of the Michaelis–Menten constants ( $K_M$ ) for TMB and  $H_2O_2$  for HRP.

| $K_M$                                                       | Ref          |
|-------------------------------------------------------------|--------------|
| $K_M = 0.3322$ mM for TMB<br>$K_M = 18.64$ mM for $H_2O_2$  | 185          |
| $K_M = 0.01$ mM for TMB<br>$K_M = 0.37$ mM for $H_2O_2$     | 188          |
| $K_M = 0.5$ mM for TMB<br>$K_M = 0.645$ mM for $H_2O_2$     | 190          |
| $K_M = 0.415$ mM for TMB<br>$K_M = 5.2$ mM for $H_2O_2$     | 55           |
| $K_M = 0.367$ mM for TMB<br>$K_M = 3.4$ mM for $H_2O_2$     | 195          |
| $K_M = 0.434$ mM for TMB<br>$K_M = 3.70$ mM for $H_2O_2$    | 75           |
| $K_M = 0.318$ mM for TMB<br>$K_M = 0.217$ mM for $H_2O_2$   | 8            |
| $K_M = 0.301$ mM for TMB<br>$K_M = 0.935$ mM for $H_2O_2$   | 10           |
| $K_M = 0.20$ mM for TMB<br>$K_M = 0.16$ mM for $H_2O_2$     | 131          |
| $K_M = 0.14$ mM for TMB<br>$K_M = 0.81$ mM for $H_2O_2$     | 18           |
| $K_M = 0.126$ mM for TMB<br>$K_M = 0.322$ mM for $H_2O_2$   | 54           |
| $K_M = 0.172$ mM for TMB<br>$K_M = 10.9$ mM for $H_2O_2$    | 97           |
| $K_M = 0.20$ mM for TMB<br>$K_M = 0.16$ mM for $H_2O_2$     | 98           |
| $K_M = 0.204$ mM for TMB<br>$K_M = 0.171$ mM for $H_2O_2$   | 137          |
| $K_M = 0.041$ mM for TMB<br>$K_M = 6.36$ mM for $H_2O_2$    | 128          |
| $K_M = 0.069$ mM for TMB<br>$K_M = 3.42$ mM for $H_2O_2$    | 129          |
| $K_M = 0.723$ mM for TMB<br>$K_M = 3.20$ mM for $H_2O_2$    | 139          |
| $K_M = 0.25$ mM for TMB<br>$K_M = 0.224$ mM for $H_2O_2$    | 151          |
| $K_M = 0.2343$ mM for TMB<br>$K_M = 0.2832$ mM for $H_2O_2$ | 177          |
| $K_M = 0.102$ mM for TMB<br>$K_M = 0.25$ mM for $H_2O_2$    | This article |

## S4. Effect of the substrate concentration on the reaction rate

The rate of the reaction is determined by the Michaelis-Menten model (1).

$V_{max}$  – max. reaction rate;

$[S]$  – concentration of the substrate'

$K_M$  – Michaelis-Menten constant

$$v_0 = \frac{V_{max} \times [S]}{(K_M + [S])} \quad (1)$$

When the concentration of the substrate is significantly higher than Michaelis-Menten constant ( $[S] \gg K_M$ ) (2)

$$v_0 \rightarrow V_{max} \quad (2)$$

The fraction of max rate (%) is determined by the substrate concentration (3)

$$\frac{v_0}{V_{max}} = \frac{[S]}{K_M + [S]} \times 100\% \quad (3)$$

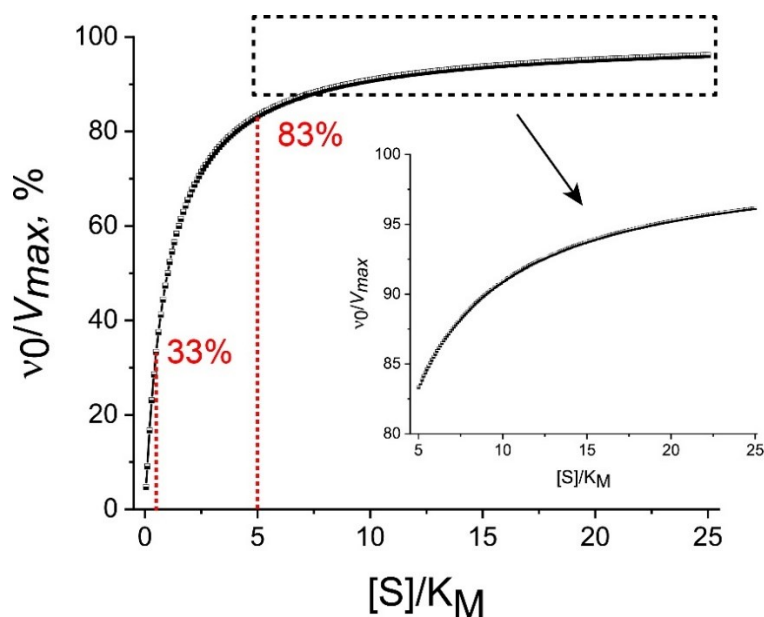

Fig S1. Effect of the substrate concentration (substrate to  $K_M$  ratio) on the rate of the reaction. The red dotted lines show substrate concentration equal to  $0.5 \times K_M$  (33% of max rate) and  $5 \times K_M$  (83% of max rate).

## S5. Bioanalytical applications of nanozymes

**Table S3.** Kinetic parameters and bioanalytical applications of nanozymes.

| Nanozyme      | Kinetic parameters                                                                             | Inhibition by the substrate                                            | Conditions of nanozyme catalysis                                                                  | Application of nanozyme catalysis                       | Ref. |
|---------------|------------------------------------------------------------------------------------------------|------------------------------------------------------------------------|---------------------------------------------------------------------------------------------------|---------------------------------------------------------|------|
| Au@Pt         | Not measured                                                                                   | Not measured                                                           | 0.05% DAB and 0.015% H <sub>2</sub> O <sub>2</sub> in PBS, pH 7.2                                 | Signal amplification in lateral flow immunoassay (LFIA) | 206  |
| Au@Pt         | K <sub>M</sub> = 5.75 mM for H <sub>2</sub> O <sub>2</sub><br>Not measured for TMB and DAB     | Not measured                                                           | 200 mM H <sub>2</sub> O <sub>2</sub><br>0.05% DAB<br>0.05% NiSO <sub>4</sub> in 50 mM PBS, pH=7.3 | Signal amplification in LFIA                            | 207  |
| Au@Ag-Pt      | K <sub>M</sub> = 0.06 mM for TMB<br>K <sub>M</sub> =320 mM for H <sub>2</sub> O <sub>2</sub>   | Not measured                                                           | 200 mM H <sub>2</sub> O <sub>2</sub><br>0.05% DAB<br>0.05% NiSO <sub>4</sub> in 50 mM PBS, pH=7   | Signal amplification in LFIA                            | 208  |
| Prussian Blue | Not measured                                                                                   | Not measured                                                           | Commercial DAB substrate                                                                          | Signal amplification in LFIA                            | 209  |
| Prussian Blue | Not measured                                                                                   | Not measured                                                           | Commercial TMB substrate                                                                          | Signal amplification in LFIA                            | 210  |
| Prussian Blue | Not measured                                                                                   | Not measured                                                           | 10 mM DAB, H <sub>2</sub> O <sub>2</sub> not reported                                             | Signal amplification in LFIA                            | 211  |
| Prussian Blue | Not measured                                                                                   | Not measured                                                           | 5 mg/mL TMB and 15% H <sub>2</sub> O <sub>2</sub>                                                 | Signal amplification in vertical flow immunoassay       | 212  |
| Prussian Blue | Not measured                                                                                   | Not measured                                                           | TMB and H <sub>2</sub> O <sub>2</sub> not reported                                                | Signal amplification in LFIA                            | 213  |
| Prussian Blue | K <sub>M</sub> = 0.178 mM for TMB<br>K <sub>M</sub> =3.29 mM for H <sub>2</sub> O <sub>2</sub> | No inhibition<br>TMB ≤ 1.3 mM<br>H <sub>2</sub> O <sub>2</sub> ≤ 30 mM | 1 mM TMB<br>60 mM H <sub>2</sub> O <sub>2</sub>                                                   | Colorimetric and electrochemical sensing                | 187  |

|                                                       |                                                                                                                                                                               |                                                                                              |                                                                             |                                           |     |
|-------------------------------------------------------|-------------------------------------------------------------------------------------------------------------------------------------------------------------------------------|----------------------------------------------------------------------------------------------|-----------------------------------------------------------------------------|-------------------------------------------|-----|
| Fe <sub>3</sub> O <sub>4</sub> @Prussian Blue         | Not measured                                                                                                                                                                  | Not measured                                                                                 | 10 mM TMB and 500 mM H <sub>2</sub> O <sub>2</sub>                          | Signal amplification in LFIA              | 214 |
| Mesoporous silica particles loaded with Prussian Blue | Not measured                                                                                                                                                                  | Not measured                                                                                 | TMB and H <sub>2</sub> O <sub>2</sub> not reported                          | Signal amplification in paper-based assay | 215 |
| Fe <sub>2</sub> O <sub>3</sub> @Prussian Blue         | K <sub>M</sub> = 0.307 mM for TMB<br>K <sub>M</sub> = 323.6 mM for H <sub>2</sub> O <sub>2</sub>                                                                              | No inhibition<br>TMB ≤ 0.8 mM<br>H <sub>2</sub> O <sub>2</sub> ≤ 800 mM                      | TMB and H <sub>2</sub> O <sub>2</sub> not reported                          | ELISA-like colorimetric assay             | 167 |
| Fe <sub>3</sub> O <sub>4</sub> @Pt                    | Not measured                                                                                                                                                                  | Not measured                                                                                 | Commercial DAB substrate supplemented with 7% H <sub>2</sub> O <sub>2</sub> | Signal amplification in LFIA              | 216 |
| Pt                                                    | K <sub>M</sub> = 0.1206 mM for TMB<br>K <sub>M</sub> = 205.6 mM for H <sub>2</sub> O <sub>2</sub>                                                                             | Not measured                                                                                 | 0.8 mM TMB and 500 mM H <sub>2</sub> O <sub>2</sub>                         | Colorimetric assay                        | 24  |
| Pt nanoclusters                                       | K <sub>M</sub> = 0.096 mM for TMB<br>K <sub>M</sub> = 3.07 mM for H <sub>2</sub> O <sub>2</sub>                                                                               | Shown for the assay. No inhibition<br>TMB ≤ 0.8 mM<br>H <sub>2</sub> O <sub>2</sub> ≤ 0.6 mM | 0.5 mM TMB and H <sub>2</sub> O <sub>2</sub> was varied                     | Colorimetric assay                        | 25  |
| Pt                                                    | K <sub>M</sub> = 0.120 mM for TMB<br>K <sub>M</sub> = 769 mM for H <sub>2</sub> O <sub>2</sub>                                                                                | No inhibition<br>TMB ≤ 0.5 mM<br>H <sub>2</sub> O <sub>2</sub> ≤ 1600 mM                     | 0.921 mM TMB and 7.63 M H <sub>2</sub> O <sub>2</sub>                       | ELISA-like colorimetric assay             | 217 |
| Pt nanoclusters                                       | Diameter 3.3 nm<br>K <sub>M</sub> = 0.03 mM for TMB<br>K <sub>M</sub> = 88.7 mM for H <sub>2</sub> O <sub>2</sub><br><br>Diameter 3.6 nm<br>K <sub>M</sub> = 0.079 mM for TMB | No inhibition<br>TMB ≤ 0.14 mM<br>H <sub>2</sub> O <sub>2</sub> ≤ 200 mM                     | 0.125 mM TMB, 125 mM H <sub>2</sub> O <sub>2</sub>                          | Colorimetric assay                        | 28  |

|                       |                                                                       |                                                                                    |                                                             |                               |     |
|-----------------------|-----------------------------------------------------------------------|------------------------------------------------------------------------------------|-------------------------------------------------------------|-------------------------------|-----|
|                       | $K_M = 73.6$ mM for $H_2O_2$                                          |                                                                                    |                                                             |                               |     |
| Pt                    | $K_M = 0.119$ mM for TMB<br>$K_M = 41.8$ mM for $H_2O_2$              | No inhibition<br>TMB $\leq 0.4$ mM<br>$H_2O_2 \leq 250$ mM                         | 0.125 mM TMB, 125 mM $H_2O_2$                               | Colorimetric assay            | 30  |
| Pt                    | $K_M = 0.0995$ mM for TMB<br>$K_M = 230.8$ mM for $H_2O_2$            | No inhibition<br>TMB $\leq 0.8$ mM<br>$H_2O_2 \leq 2500$ mM                        | 0.8 mM TMB, 500 mM $H_2O_2$                                 | Colorimetric assay            | 189 |
| Pt                    | $K_M = 0.052$ mM for TMB<br>$K_M = 63.86$ mM for $H_2O_2$             | Shown for the assay.<br>No inhibition<br>TMB $\leq 0.3$ mM<br>$H_2O_2 \leq 100$ mM | 0.08 mM TMB<br>80 mM $H_2O_2$                               | Colorimetric assay            | 34  |
| PtPd                  | $K_M = 1.78$ mM for TMB<br>$K_M = 0.053$ mM for $H_2O_2$              | No inhibition<br>TMB $\leq 20$ mM<br>$H_2O_2 \leq 5$ mM                            | Not reported                                                | Signal amplification in LFIA  | 47  |
| Au@Pt                 | $K_M = 0.041$ mM for TMB<br>$K_M = 6.85$ mM for $H_2O_2$              | No inhibition<br>TMB $\leq 0.3$ mM<br>$H_2O_2 \leq 25$ mM                          | 0.95 mM TMB<br>182 mM $H_2O_2$                              | Colorimetric assay            | 43  |
| Graphene quantum dots | $K_M = 0.01$ mM for TMB<br>$K_M = 8$ mM for $H_2O_2$                  | No inhibition<br>TMB $\leq 0.18$ mM<br>$H_2O_2 \leq 300$ mM                        | 0.4 mM TMB<br>$H_2O_2$ generated in situ by choline oxidase | Colorimetric assay            | 186 |
| Au@Pt                 | $K_M = 0.0095$ mM and 0.027 mM for TMB for various Au@Pt compositions |                                                                                    | 6.3 mM TMB<br>10 mM $H_2O_2$                                | ELISA-like colorimetric assay | 218 |

|                                                |                                                                                                          |                                                                           |                                                              |                               |     |
|------------------------------------------------|----------------------------------------------------------------------------------------------------------|---------------------------------------------------------------------------|--------------------------------------------------------------|-------------------------------|-----|
|                                                | $K_M$ for $H_2O_2$ was not reported                                                                      |                                                                           |                                                              |                               |     |
| Pt clusters on the Fe single-atom              | $K_M = 1.8$ mM for TMB<br>$K_M = 12.2$ mM for $H_2O_2$                                                   | No inhibition<br>$TMB \leq 1.6$ mM<br>$H_2O_2 \leq 80$ mM                 | 0.16 mM TMB<br>$H_2O_2$ generated in situ by glucose oxidase | ELISA-like colorimetric assay | 219 |
| Graphene oxide-cationic multi-shaped GNP-hemin | $K_M = 0.24-0.52$ mM for TMB for various targets<br>$K_M = 396-1100$ mM for $H_2O_2$ for various targets | No inhibition<br>$TMB \leq 3$ mM<br>$H_2O_2 \leq 1000$ mM                 | 0.77 mM TMB<br>200 mM $H_2O_2$                               | Colorimetric assay            | 220 |
| $Fe_3O_4@C$                                    | $K_M = 0.2$ mM for TMB<br>$K_M = 0.23$ mM for $H_2O_2$                                                   | No inhibition<br>$TMB \leq 0.3$ mM<br>$H_2O_2 \leq 2$ mM                  | 0.5 mM TMB<br>200 mM $H_2O_2$                                | ELISA-like colorimetric assay | 221 |
| $MoS_2$                                        | Not measured for N,N-diethyl-p-phenylenediamine and $H_2O_2$                                             | Not measured                                                              | 3 mM N,N-diethyl-p-phenylenediamine<br>10 mM $H_2O_2$        | Colorimetric assay            | 222 |
| Chitosan-coated Pd                             | $K_M = 0.09$ mM for TMB<br>$K_M = 537.7$ mM for $H_2O_2$                                                 | No inhibition<br>$TMB \leq 0.25$ mM<br>$H_2O_2 \leq 1500$ mM              | 0.03 mM TMB<br>2.5 mM $H_2O_2$                               | Colorimetric assay            | 223 |
| Pd                                             | $K_M = 0.165$ mM for TMB<br>$K_M = 1064$ mM for $H_2O_2$                                                 | No inhibition<br>$TMB \leq 0.5$ mM<br>Inhibition if $H_2O_2 \geq 8000$ mM | 0.5 mM TMB<br>7.2 M $H_2O_2$                                 | ELISA-like colorimetric assay | 224 |
| $Co_3O_4$                                      | $K_M = 0.037$ mM for TMB<br>$K_M = 140.07$ mM for $H_2O_2$                                               | No inhibition<br>$TMB \leq 0.5$ mM<br>$H_2O_2 \leq 2000$ mM               | 0.4 mM TMB<br>$H_2O_2$ generated in situ by glucose oxidase  | Colorimetric assay            | 61  |



|                                    |                                                                                                                                                                                                                                                                                                                                                                  |                                                                                           |                                                                                  |                    |     |
|------------------------------------|------------------------------------------------------------------------------------------------------------------------------------------------------------------------------------------------------------------------------------------------------------------------------------------------------------------------------------------------------------------|-------------------------------------------------------------------------------------------|----------------------------------------------------------------------------------|--------------------|-----|
| ZnFe <sub>2</sub> O <sub>4</sub>   | K <sub>M</sub> = 0.85 mM for TMB<br>K <sub>M</sub> = 1.66 mM for H <sub>2</sub> O <sub>2</sub>                                                                                                                                                                                                                                                                   | No inhibition<br>TMB ≤ 1.6 mM<br><br>Inhibition if H <sub>2</sub> O <sub>2</sub> ≥ 600 mM | 1.8 mM TMB<br>H <sub>2</sub> O <sub>2</sub> generated in situ by glucose oxidase | Colorimetric assay | 181 |
| CeO <sub>2</sub> of various shapes | Octahedron-shaped<br>K <sub>M</sub> = 3.743 mM for TMB<br>K <sub>M</sub> = 415.2 mM for H <sub>2</sub> O <sub>2</sub><br><br>Rod-shaped<br>K <sub>M</sub> = 0.230 mM for TMB<br>K <sub>M</sub> = 302 mM for H <sub>2</sub> O <sub>2</sub><br><br>Cube-shaped<br>K <sub>M</sub> = 0.1801 mM for TMB<br>K <sub>M</sub> = 30.9 mM for H <sub>2</sub> O <sub>2</sub> | No inhibition<br>TMB ≤ 2 mM<br>H <sub>2</sub> O <sub>2</sub> ≤ 2000 mM                    | 2 mM TMB<br>H <sub>2</sub> O <sub>2</sub> generated in situ by glucose oxidase   | Colorimetric assay | 225 |
| Ag of various shapes               | Flower-shaped<br>K <sub>M</sub> = 1.1 mM for TMB<br>K <sub>M</sub> = 369.6 mM for H <sub>2</sub> O <sub>2</sub><br><br>Spherical-shaped<br>K <sub>M</sub> = 0.6 mM for TMB<br>K <sub>M</sub> = 383.9 mM for H <sub>2</sub> O <sub>2</sub>                                                                                                                        | No inhibition<br>TMB ≤ 1.6 mM<br>H <sub>2</sub> O <sub>2</sub> ≤ 600 mM                   | 0.8 mM TMB<br>55 mM H <sub>2</sub> O <sub>2</sub>                                | Colorimetric assay | 226 |
| Pd@Pt                              | K <sub>M</sub> = 0.0865 mM for TMB<br>K <sub>M</sub> = 2.231 mM for H <sub>2</sub> O <sub>2</sub>                                                                                                                                                                                                                                                                | No inhibition<br>TMB ≤ 0.75 mM<br>H <sub>2</sub> O <sub>2</sub> ≤ 10 mM                   | 0.5 mM TMB<br>H <sub>2</sub> O <sub>2</sub> generated in situ by glucose oxidase | Colorimetric assay | 22  |
| Pt                                 | K <sub>M</sub> = 0.174 mM for TMB                                                                                                                                                                                                                                                                                                                                | No inhibition                                                                             | 0.5 mM TMB<br>100 mM H <sub>2</sub> O <sub>2</sub>                               | Colorimetric assay | 227 |

|                         |                                                                        |                                                                          |                                                              |                               |     |
|-------------------------|------------------------------------------------------------------------|--------------------------------------------------------------------------|--------------------------------------------------------------|-------------------------------|-----|
|                         | $K_M = 82.7$ mM for $H_2O_2$                                           | TMB $\leq$ 1.5 mM<br>$H_2O_2 \leq$ 140 mM                                |                                                              |                               |     |
| Pd                      | $K_M = 0.063$ mM for TMB<br>$K_M = 80.8$ mM for $H_2O_2$               | No inhibition<br>TMB $\leq$ 0.25 mM<br>$H_2O_2 \leq$ 180 mM              | 0.125 mM TMB<br>125 mM $H_2O_2$                              | Colorimetric assay            | 228 |
| Au/ $Cu_2O$             | $K_M = 0.21$ mM for TMB<br>$K_M = 10.56$ mM for $H_2O_2$               | No inhibition<br>TMB $\leq$ 1 mM<br>$H_2O_2 \leq$ 50 mM                  | 0.167 mM TMB<br>$H_2O_2$ concentration was varied            | Colorimetric assay            | 229 |
| AuPd                    | $K_M = 0.295$ mM for TMB<br>$K_M = 5.89$ mM for $H_2O_2$               | No inhibition<br>TMB $\leq$ 1 mM<br>$H_2O_2 \leq$ 25 mM                  | 0.85 mM TMB<br>$H_2O_2$ generated in situ by glucose oxidase | Colorimetric assay            | 230 |
| $IrO_2$ -graphene oxide | $K_M = 0.56$ mM for TMB<br>$K_M = 5.19$ mM for $H_2O_2$                | No inhibition<br>TMB $\leq$ 2 mM<br>$H_2O_2 \leq$ 200 mM                 | 0.5 mM TMB<br>5 mM $H_2O_2$                                  | Colorimetric assay            | 231 |
| Ir                      | $K_M = 0.12$ mM for TMB<br>$K_M = 3.27$ mM for $H_2O_2$                | No inhibition<br>TMB $\leq$ 0.25 mM<br>$H_2O_2 \leq$ 2.5 mM              | 0.25 mM TMB<br>$H_2O_2$ generated in situ by glucose oxidase | Colorimetric assay            | 232 |
| Pd-Ir                   | $K_M = 0.13$ mM for TMB<br>$K_M = 340$ mM for $H_2O_2$                 | Inhibition if TMB $\geq$ 1 mM<br><br>Inhibition if $H_2O_2 \geq$ 7000 mM | 0.8 mM TMB<br>2000 mM $H_2O_2$                               | ELISA-like colorimetric assay | 26  |
| BSA- $MnO_2$            | $K_M = 0.31$ mM for o-phenylenediamine<br>$K_M = 0.12$ mM for $H_2O_2$ | No inhibition<br>o-phenylene                                             | 5 mM o-phenylenediamine                                      | ELISA-like colorimetric assay | 233 |

|                                               |                                                                                                                                                                                                                                                                                                                                                                                                 |                                                                                             |                                                                          |                                    |     |
|-----------------------------------------------|-------------------------------------------------------------------------------------------------------------------------------------------------------------------------------------------------------------------------------------------------------------------------------------------------------------------------------------------------------------------------------------------------|---------------------------------------------------------------------------------------------|--------------------------------------------------------------------------|------------------------------------|-----|
|                                               |                                                                                                                                                                                                                                                                                                                                                                                                 | diamine $\leq$<br>8 mM<br>H <sub>2</sub> O <sub>2</sub> $\leq$ 4<br>mM                      |                                                                          |                                    |     |
| Fe <sub>3</sub> O <sub>4</sub> -Au            | Not measured                                                                                                                                                                                                                                                                                                                                                                                    | Not measured                                                                                | 5 mM luminol<br>4 mM H <sub>2</sub> O <sub>2</sub>                       | Chemiluminescence<br>immunoassay   | 234 |
| Au                                            | K <sub>M</sub> = 0.024 mM for<br>TMB<br>K <sub>M</sub> = 57.84 mM for<br>H <sub>2</sub> O <sub>2</sub>                                                                                                                                                                                                                                                                                          | No<br>inhibition<br>TMB $\leq$<br>0.15 mM<br>H <sub>2</sub> O <sub>2</sub> $\leq$<br>500 mM | 0.08 mM TMB<br>0.4 mM H <sub>2</sub> O <sub>2</sub>                      | Colorimetric<br>assay              | 235 |
| Doped<br>graphene                             | Not measured                                                                                                                                                                                                                                                                                                                                                                                    | Not<br>measured                                                                             | 0.5 mM TMB<br>5-25 mM H <sub>2</sub> O <sub>2</sub>                      | Colorimetric<br>assay              | 236 |
| Pt<br>nanoclusters<br>of various<br>diameters | 2.1 nm diameter<br>K <sub>M</sub> = 0.4964 mM<br>for TMB<br>K <sub>M</sub> = 0.9504 mM for<br>H <sub>2</sub> O <sub>2</sub><br><br>3.2 nm diameter<br>K <sub>M</sub> = 0.4394 mM<br>for TMB<br>K <sub>M</sub> = 1.183 mM for<br>H <sub>2</sub> O <sub>2</sub><br><br>4.0 nm diameter<br>K <sub>M</sub> = 0.6488 mM<br>for TMB<br>K <sub>M</sub> = 2.900 mM for<br>H <sub>2</sub> O <sub>2</sub> | Not<br>measured                                                                             | 0.47 mM TMB<br>4.8 mM H <sub>2</sub> O <sub>2</sub>                      | Colorimetric<br>assay              | 237 |
| Au                                            | Not measured                                                                                                                                                                                                                                                                                                                                                                                    | Not<br>measured                                                                             | Commercial<br>TMB kit                                                    | Colorimetric<br>assay              | 238 |
| Fe <sub>3</sub> O <sub>4</sub>                | Not measured                                                                                                                                                                                                                                                                                                                                                                                    | Not<br>measured                                                                             | DAB and H <sub>2</sub> O <sub>2</sub><br>concentrations<br>not specified | Signal<br>amplification in<br>LFIA | 239 |
| Au@Pt                                         | Not measured                                                                                                                                                                                                                                                                                                                                                                                    | Not<br>measured                                                                             | TMB not<br>specified<br>20 mM H <sub>2</sub> O <sub>2</sub>              | SERS<br>registration               | 240 |
| Au-Ag@Pt                                      | K <sub>M</sub> = 0.13 mM for<br>TMB<br>K <sub>M</sub> = 0.3 mM for<br>H <sub>2</sub> O <sub>2</sub>                                                                                                                                                                                                                                                                                             | No<br>inhibition<br>TMB $\leq$<br>0.8 mM<br>H <sub>2</sub> O <sub>2</sub> $\leq$<br>0.3 mM  | TMB and H <sub>2</sub> O <sub>2</sub><br>concentrations<br>not specified | Signal<br>amplification in<br>LFIA | 241 |

|                                           |                                                              |                                                                 |                                                      |                                |     |
|-------------------------------------------|--------------------------------------------------------------|-----------------------------------------------------------------|------------------------------------------------------|--------------------------------|-----|
| Graphene Oxide/Fe-metal-organic framework | $K_M = 0.3599$ mM for TMB<br>$K_M$ not measured for $H_2O_2$ | No inhibition<br>TMB $\leq 1.5$ mM<br>Not measured for $H_2O_2$ | Commercial TMB kit                                   | Colorimetric assay             | 242 |
| NiCo@C                                    | $K_M = 0.34$ mM for TMB<br>$K_M = 8.71$ mM for $H_2O_2$      | No inhibition<br>TMB $\leq 1.0$ mM<br>$H_2O_2 \leq 30$ mM       | 0.5mM TMB<br>10 mM $H_2O_2$                          | Colorimetric assay             | 243 |
| $Fe_2MoO_4$                               | $K_M = 3.056$ mM for TMB<br>$K_M = 0.257$ mM for $H_2O_2$    | No inhibition<br>TMB $\leq 2.0$ mM<br>$H_2O_2 \leq 2.5$ mM      | TMB and $H_2O_2$ concentrations not specified        | Colorimetric assay             | 244 |
| $Co_2V_2O_7$                              | $K_M = 0.311$ mM for TMB<br>$K_M = 0.669$ mM for $H_2O_2$    | No inhibition<br>TMB $\leq 0.5$ mM<br>$H_2O_2 \leq 7$ mM        | $H_2O_2$ concentrations not specified                | Fluorescent assay              | 245 |
| Pt/ $Co_3O_4$                             | $K_M = 0.2116$ mM for TMB<br>$K_M = 0.1644$ mM for $H_2O_2$  | No inhibition<br>TMB $\leq 0.15$ mM<br>$H_2O_2 \leq 0.18$ mM    | 0.17 mM TMB<br>$H_2O_2$ concentrations not specified | Colorimetric assay             | 246 |
| Pd@Pt                                     | $K_M = 0.5$ mM for TMB<br>$K_M = 0.2$ mM for $H_2O_2$        | No inhibition<br>TMB $\leq 0.5$ mM<br>$H_2O_2 \leq 0.5$ mM      | Commercial TMB substrate                             | Colorimetric paper-based assay | 247 |
| PtCu                                      | $K_M = 0.24$ mM for TMB<br>$K_M = 7.77$ mM for $H_2O_2$      | No inhibition<br>TMB $\leq 1.5$ mM<br>$H_2O_2 \leq 100$ mM      | 1.3mM TMB<br>16 mM $H_2O_2$                          | Colorimetric assay             | 248 |
| CuO                                       | Not measured                                                 | Shown for the assay;                                            | 8.69 mM TMB<br>65 mM $H_2O_2$                        | Colorimetric assay             | 249 |

|                                                    |                                                                                                  |                                                                                      |                                                                                              |                                |     |
|----------------------------------------------------|--------------------------------------------------------------------------------------------------|--------------------------------------------------------------------------------------|----------------------------------------------------------------------------------------------|--------------------------------|-----|
|                                                    |                                                                                                  | No inhibition<br>TMB $\leq$ 13 mM;<br>H <sub>2</sub> O <sub>2</sub> $\leq$ 108.7 mM; |                                                                                              |                                |     |
| N, S-doped carbon dots@Ag                          | K <sub>M</sub> = 0.307 mM for TMB<br>K <sub>M</sub> = 1.137 mM for H <sub>2</sub> O <sub>2</sub> | No inhibition<br>TMB $\leq$ 1.2 mM<br>H <sub>2</sub> O <sub>2</sub> $\leq$ 300 mM    | 2 mM TMB<br>H <sub>2</sub> O <sub>2</sub> generated in situ by cholesterol oxidase           | SERS detection                 | 250 |
| Fe, N-Doped Carbon Dot                             | K <sub>M</sub> = 0.23 mM for TMB<br>K <sub>M</sub> = 1.10 mM for H <sub>2</sub> O <sub>2</sub>   | No inhibition<br>TMB $\leq$ 0.6 mM<br>H <sub>2</sub> O <sub>2</sub> $\leq$ 3 mM      | 0.5 mM TMB<br>H <sub>2</sub> O <sub>2</sub> generated in situ by cholesterol/glucose oxidase | Paper based colorimetric assay | 251 |
| MoS <sub>2</sub> -MIL-101(Fe)                      | K <sub>M</sub> = 0.12 mM for TMB<br>K <sub>M</sub> = 0.015 mM for H <sub>2</sub> O <sub>2</sub>  | No inhibition<br>TMB $\leq$ 1.5 mM<br>H <sub>2</sub> O <sub>2</sub> $\leq$ 210 mM    | 0.25 mM TMB<br>0.4 mM H <sub>2</sub> O <sub>2</sub>                                          | Colorimetric assay             | 252 |
| Vancomycin-stabilized Pd                           | K <sub>M</sub> = 1.007 mM for TMB<br>K <sub>M</sub> = 0.623 mM for H <sub>2</sub> O <sub>2</sub> | No inhibition<br>TMB $\leq$ 0.36 mM<br>H <sub>2</sub> O <sub>2</sub> $\leq$ 2 mM     | 0.44 mM TMB<br>2.2 mM H <sub>2</sub> O <sub>2</sub>                                          | Colorimetric assay             | 253 |
| Fe-coordinated L-lysine                            | K <sub>M</sub> = 0.372 mM for TMB<br>K <sub>M</sub> = 0.478 mM for H <sub>2</sub> O <sub>2</sub> | No inhibition<br>TMB $\leq$ 2 mM<br>H <sub>2</sub> O <sub>2</sub> $\leq$ 2 mM        | 0.53 mM TMB<br>H <sub>2</sub> O <sub>2</sub> generated in situ by glucose oxidase            | Colorimetric assay             | 254 |
| N-doped carbon dots@Fe <sub>3</sub> O <sub>4</sub> | K <sub>M</sub> = 0.607 mM for TMB<br>K <sub>M</sub> = 0.719 mM for H <sub>2</sub> O <sub>2</sub> | No inhibition<br>TMB $\leq$ 0.7 mM<br>H <sub>2</sub> O <sub>2</sub> $\leq$ 0.7 mM    | 0.5 mM TMB<br>H <sub>2</sub> O <sub>2</sub> generated in situ by glucose oxidase             | Colorimetric assay             | 255 |
| CoFe <sub>2</sub> O <sub>4</sub>                   | Not measured                                                                                     | Not measured                                                                         | Commercial DAB staining kit                                                                  | Signal amplification in LFIA   | 256 |

|                         |                                                           |                                                                                   |                                |                               |     |
|-------------------------|-----------------------------------------------------------|-----------------------------------------------------------------------------------|--------------------------------|-------------------------------|-----|
| Fe-doped CuO            | $K_M = 0.986$ mM for TMB<br>$K_M = 15.9$ mM for $H_2O_2$  | No inhibition<br>$TMB \leq 0.67$ mM<br>$H_2O_2 \leq 100$ mM                       | 0.5 mM TMB<br>0.15 mM $H_2O_2$ | Colorimetric assay            | 257 |
| Fe/Zr-UIO-66 MOF        | Not measured                                              | Not measured                                                                      | 2.5 mM TMB<br>5 mM $H_2O_2$    | Colorimetric assay            | 258 |
| PVP-Pt                  | $K_M = 0.022$ mM for TMB<br>$K_M = 3.92$ mM for $H_2O_2$  | Shown for the assay;<br>No inhibition<br>$TMB \leq 30$ mM<br>$H_2O_2 \leq 400$ mM | 2.5 mM TMB<br>166 mM $H_2O_2$  | Colorimetric assay            | 259 |
| Pt@Au                   | Not measured                                              | Not measured                                                                      | Not specified                  | Colorimetric assay            | 260 |
| $Fe_3O_4$               | Not measured                                              | Not measured                                                                      | Not specified                  | Signal amplification in LFIA  | 261 |
| Prussian Blue           | Not measured                                              | Not measured                                                                      | 0.4 mM TMB<br>100 mM $H_2O_2$  | ELISA-like colorimetric assay | 262 |
| Albumin-Prussian Blue   | Not measured                                              | Not measured                                                                      | 0.4 mM TMB<br>100 mM $H_2O_2$  | ELISA-like colorimetric assay | 263 |
| $MoS_2$ -Prussian Blue  | $K_M = 0.22$ mM for TMB<br>$K_M = 3.17$ mM for $H_2O_2$   | No inhibition<br>$TMB \leq 0.1$ mM<br>$H_2O_2 \leq 20$ mM                         | 0.1 mM TMB<br>20 mM $H_2O_2$   | Colorimetric assay            | 264 |
| Tannic acid-capped Au   | $K_M = 0.2$ mM for TMB<br>$K_M = 190$ mM for $H_2O_2$     | No inhibition<br>$TMB \leq 1$ mM<br>$H_2O_2 \leq 600$ mM                          | 0.5 mM TMB<br>530 mM $H_2O_2$  | Colorimetric assay            | 265 |
| Fe@BC                   | Not measured                                              | Not measured                                                                      | Commercial TMB kit             | ELISA-like colorimetric assay | 266 |
| Fe-coordination polymer | $K_M = 0.166$ mM for TMB<br>$K_M = 0.189$ mM for $H_2O_2$ | No inhibition<br>$TMB \leq 1$ mM                                                  | 0.4 mM TMB<br>3 mM $H_2O_2$    | ELISA-like colorimetric assay | 267 |

|                                |                                                                                         |                                                                                                                       |                                                     |                               |     |
|--------------------------------|-----------------------------------------------------------------------------------------|-----------------------------------------------------------------------------------------------------------------------|-----------------------------------------------------|-------------------------------|-----|
|                                |                                                                                         | $\text{H}_2\text{O}_2 \leq 0.5 \text{ mM}$                                                                            |                                                     |                               |     |
| Au@Pt@SiO <sub>2</sub>         | $K_M = 0.124 \text{ mM}$ for TMB<br>$K_M = 121.8 \text{ mM}$ for $\text{H}_2\text{O}_2$ | No inhibition<br>$\text{TMB} \leq 1 \text{ mM}$<br>$\text{H}_2\text{O}_2 \leq 3.3 \text{ M}$                          | 1 mM TMB<br>100 mM $\text{H}_2\text{O}_2$           | ELISA-like colorimetric assay | 268 |
| Fe <sub>3</sub> O <sub>4</sub> | Not measured                                                                            | Not measured                                                                                                          | DAB- $\text{H}_2\text{O}_2$ commercial staining kit | Signal amplification in LFIA  | 269 |
| Au                             | Not measured                                                                            | Not measured                                                                                                          | Not specified                                       | ELISA-like colorimetric assay | 270 |
| Au                             | Not measured                                                                            | Not measured                                                                                                          | 0.78 mM TMB<br>300 mM $\text{H}_2\text{O}_2$        | ELISA-like colorimetric assay | 271 |
| PdRu                           | $K_M = 0.745 \text{ mM}$ for TMB<br>$K_M = 1.628 \text{ mM}$ for $\text{H}_2\text{O}_2$ | No inhibition<br>$\text{TMB} \leq 1 \text{ mM}$<br>$\text{H}_2\text{O}_2 \leq 5 \text{ mM}$                           | 0.4 mM TMB<br>3 mM $\text{H}_2\text{O}_2$           | ELISA-like colorimetric assay | 272 |
| Au-graphene-chitosan           | $K_M = 0.048 \text{ mM}$ for TMB<br>$K_M$ not reported for $\text{H}_2\text{O}_2$       | Shown for the assay;<br>No inhibition<br>$\text{TMB} \leq 25 \text{ mM}$<br>$\text{H}_2\text{O}_2 \leq 16 \text{ mM}$ | 15 mM TMB<br>5 mM $\text{H}_2\text{O}_2$            | ELISA-like colorimetric assay | 273 |
| Au@Ag                          | $K_M = 0.25 \text{ mM}$ for TMB<br>$K_M = 0.17 \text{ mM}$ for $\text{H}_2\text{O}_2$   | No inhibition<br>$\text{TMB} \leq 1 \text{ mM}$<br>$\text{H}_2\text{O}_2 \leq 1 \text{ mM}$                           | 10 mM TMB<br>2500 mM $\text{H}_2\text{O}_2$         | ELISA-like colorimetric assay | 274 |
| Pt-Au                          | Not measured                                                                            | Not measured                                                                                                          | Commercial TMB solution                             | Signal amplification in LFIA  | 275 |
| Fe-N-C single atom nanozyme    | Not measured                                                                            | Not measured                                                                                                          | 1.4 mM TMB<br>1.4 mM $\text{H}_2\text{O}_2$         | ELISA-like colorimetric assay | 276 |
| Au@Pt@Au                       | Not measured                                                                            | Not measured                                                                                                          | Not specified                                       | ELISA-like colorimetric assay | 277 |

|                                           |                                                                                 |                                                                                      |                                                      |                                |     |
|-------------------------------------------|---------------------------------------------------------------------------------|--------------------------------------------------------------------------------------|------------------------------------------------------|--------------------------------|-----|
| Au@Pt                                     | Not measured                                                                    | Not measured                                                                         | Not specified                                        | Optical sensor                 | 278 |
| Ru-Te <sub>2</sub>                        | $K_M = 0.419$ mM for TMB<br>$K_M = 18.4$ mM for H <sub>2</sub> O <sub>2</sub>   | No inhibition<br>TMB $\leq 5$ mM<br>H <sub>2</sub> O <sub>2</sub> $\leq 40$ mM       | 1 mM TMB<br>100 mM H <sub>2</sub> O                  | ELISA-like colorimetric assay  | 279 |
| Pt@Co <sub>3</sub> O <sub>4</sub> -MOF    | Not measured                                                                    | Not measured                                                                         | 4 mM TMB<br>150 mM H <sub>2</sub> O                  | ELISA-like colorimetric assay  | 280 |
| Network of Fe <sub>3</sub> O <sub>4</sub> | $K_M = 0.87$ mM for TMB<br>$K_M = 0.11$ mM for H <sub>2</sub> O <sub>2</sub>    | No inhibition<br>TMB $\leq 2.5$ mM<br>H <sub>2</sub> O <sub>2</sub> $\leq 200$ mM    | 2.5 mM TMB<br>250 mM H <sub>2</sub> O <sub>2</sub>   | Colorimetric assay             | 281 |
| Au                                        | Not measured                                                                    | Not measured                                                                         | 5 mg/mL DAB<br>9000 mM H <sub>2</sub> O <sub>2</sub> | Signal amplification in LFIA   | 282 |
| Fe single-atom nanozyme                   | $K_M = 0.185$ mM for TMB<br>$K_M = 0.187$ mM for H <sub>2</sub> O <sub>2</sub>  | No inhibition<br>TMB $\leq 0.8$ mM<br>H <sub>2</sub> O <sub>2</sub> $\leq 1$ mM      | Commercial luminol substrate kit                     | Signal amplification in LFIA   | 283 |
| Au@Pd                                     | $K_M = 0.63$ mM for TMB<br>$K_M = 284$ mM for H <sub>2</sub> O <sub>2</sub>     | No inhibition<br>TMB $\leq 3$ mM<br>H <sub>2</sub> O <sub>2</sub> $\leq 2000$ mM     | Not specified                                        | Colorimetric assay             | 284 |
| Au                                        | Not measured                                                                    | No inhibition<br>TMB $\leq 2$ mM<br>H <sub>2</sub> O <sub>2</sub> $\leq 1000$ mM     | 1 mM TMB<br>600 mM H <sub>2</sub> O <sub>2</sub>     | Paper-based colorimetric assay | 285 |
| Rh                                        | $K_M =$ not measured for TMB<br>$K_M = 15$ mM for H <sub>2</sub> O <sub>2</sub> | Not measured for TMB;<br>No inhibition<br>H <sub>2</sub> O <sub>2</sub> $\leq 40$ mM | Not specified                                        | Signal amplification in LFIA   | 286 |



|                      |                                                             |                                                                 |                                |                                                                       |     |
|----------------------|-------------------------------------------------------------|-----------------------------------------------------------------|--------------------------------|-----------------------------------------------------------------------|-----|
| Au@Pt                | $K_M = 0.3$ mM for TMB<br>$K_M = 10.67$ mM for $H_2O_2$     | No inhibition<br>TMB $\leq 1$ mM<br>$H_2O_2 \leq 50$ mM         | 0.5 mM TMB<br>20 mM $H_2O_2$   | ELISA-like colorimetric assay                                         | 41  |
| Pd@Pt                | $K_M = 0.516$ mM for TMB<br>$K_M$ not measured for $H_2O_2$ | No inhibition<br>TMB $\leq 2$ mM<br>Not measured for $H_2O_2$   | Not specified                  | Colorimetric assay                                                    | 287 |
| Fe-MIL-88            | $K_M = 1.5$ mM for TMB<br>$K_M = 1.7$ mM for $H_2O_2$       | No inhibition<br>TMB $\leq 1$ mM<br>$H_2O_2 \leq 10$ mM         | 1 mM TMB<br>10 mM $H_2O_2$     | ELISA-like colorimetric assay                                         | 288 |
| Albumin-Hemin        | Not measured                                                | Not measured                                                    | 0.4 mM TMB<br>100 mM $H_2O_2$  | ELISA-like colorimetric assay                                         | 289 |
| Au-Pt                | Not measured                                                | Not measured                                                    | Commercial TMB kit             | Colorimetric assay                                                    | 290 |
| Au-Ru                | Not measured                                                | Not measured                                                    | Commercial TMB kit             | Colorimetric assay                                                    |     |
| Au@Ag                | Not measured for TMB<br>$K_M = 20.595$ mM for $H_2O_2$      | Not measured for TMB,<br>No inhibition<br>$H_2O_2 \leq 1200$ mM | Commercial TMB kit             | ELISA-like colorimetric assay                                         | 291 |
| Au@SiO <sub>2</sub>  | Not measured                                                | Not measured                                                    | Not specified                  | ELISA-like colorimetric assay                                         | 292 |
| Au@Pt                | Not measured                                                | Not measured                                                    | Not specified                  | ELISA-like colorimetric assay                                         | 293 |
| Black phosphorous/Au | $K_M = 0.417$ mM for TMB<br>$K_M = 20.69$ mM for $H_2O_2$   | No inhibition<br>TMB $\leq 2.5$ mM<br>$H_2O_2 \leq 3000$ mM     | 1.4 mM TMB<br>1800 mM $H_2O_2$ | ELISA-like colorimetric assay and registration of photothermal effect | 294 |

|                          |                                                                                                                                                                                                                                                                                                                                                                                                   |                                                                                                           |                                                     |                               |     |
|--------------------------|---------------------------------------------------------------------------------------------------------------------------------------------------------------------------------------------------------------------------------------------------------------------------------------------------------------------------------------------------------------------------------------------------|-----------------------------------------------------------------------------------------------------------|-----------------------------------------------------|-------------------------------|-----|
| Prussian Blue            | Not measured                                                                                                                                                                                                                                                                                                                                                                                      | Shown for the assay;<br>No inhibition<br>TMB $\leq 0.5$ mM<br>H <sub>2</sub> O <sub>2</sub> $\leq 125$ mM | 0.5 mM TMB<br>125 mM H <sub>2</sub> O <sub>2</sub>  | ELISA-like colorimetric assay | 295 |
| Citric-acid capped PtRu  | K <sub>M</sub> = 0.046 mM for TMB<br>K <sub>M</sub> = 14.9 mM for H <sub>2</sub> O <sub>2</sub>                                                                                                                                                                                                                                                                                                   | No inhibition<br>TMB $\leq 0.25$ mM<br>H <sub>2</sub> O <sub>2</sub> $\leq 25$ mM                         | 0.5 mM TMB<br>10 mM H <sub>2</sub> O <sub>2</sub>   | Colorimetric assay            | 296 |
| Au@Pt@SiO <sub>2</sub>   | Not measured                                                                                                                                                                                                                                                                                                                                                                                      | Shown for the assay;<br>No inhibition<br>TMB $\leq 0.4$ mM<br>H <sub>2</sub> O <sub>2</sub> $\leq 100$ mM | 0.4 mM TMB<br>100 mM H <sub>2</sub> O <sub>2</sub>  | ELISA-like colorimetric assay | 297 |
| Pd-Ir of different sizes | 3.3 nm<br>K <sub>M</sub> = 0.27 mM for TMB<br>K <sub>M</sub> not measured for H <sub>2</sub> O <sub>2</sub><br><br>5.9 nm<br>K <sub>M</sub> = 0.64 mM for TMB<br>K <sub>M</sub> not measured for H <sub>2</sub> O <sub>2</sub><br><br>9.8 nm<br>K <sub>M</sub> = 0.4 mM for TMB<br>K <sub>M</sub> not measured for H <sub>2</sub> O <sub>2</sub><br><br>13 nm<br>K <sub>M</sub> = 0.34 mM for TMB | No inhibition<br>TMB $\leq 0.6$ mM<br>Not measured for H <sub>2</sub> O <sub>2</sub>                      | 0.8 mM TMB<br>2000 mM H <sub>2</sub> O <sub>2</sub> | ELISA-like colorimetric assay | 298 |

|                                                             |                                                                     |                                                                 |                                                             |                               |     |
|-------------------------------------------------------------|---------------------------------------------------------------------|-----------------------------------------------------------------|-------------------------------------------------------------|-------------------------------|-----|
|                                                             | $K_M$ not measured for $H_2O_2$                                     |                                                                 |                                                             |                               |     |
| AuPt@Fe <sub>x</sub> O <sub>y</sub>                         | $K_M = 0.0518-0.0754$ mM for TMB<br>$K_M$ not measured for $H_2O_2$ | No inhibition<br>TMB $\leq 0.6$ mM<br>Not measured for $H_2O_2$ | Commercial TMB substrate supplemented with 2000 mM $H_2O_2$ | Signal amplification in LFIA  | 299 |
| Au@Pt                                                       | Not measured                                                        | Shown for the assay;<br>No inhibition<br>$H_2O_2 \leq 3000$ mM  | TMB not specified<br>2000 mM $H_2O_2$                       | Signal amplification in LFIA  | 300 |
| Prussian Blue                                               | Not measured                                                        | Not measured                                                    | 0.5 mM TMB<br>125 mM $H_2O_2$                               | ELISA-like colorimetric assay | 301 |
| Fe <sub>3</sub> O <sub>4</sub> @MOF@Pt                      | $K_M = 0.49$ mM for TMB<br>$K_M = 125$ mM for $H_2O_2$              | Not measured                                                    | 3-amino-9-ethylcarbazole not specified<br>1000 mM $H_2O_2$  | Signal amplification in LFIA  | 302 |
| Pt-BSA                                                      | Not measured                                                        | Not measured                                                    | Commercial TMB substrate                                    | ELISA-like colorimetric assay | 303 |
| graphitic C <sub>3</sub> N <sub>4</sub> - Cu <sub>2</sub> O | Not measured                                                        | Not measured                                                    | 12 mM TMB<br>3000 mM $H_2O_2$                               | Colorimetric assay            | 304 |
| Cu <sup>2+</sup> -graphene oxide                            | Not measured                                                        | No inhibition<br>TMB $\leq 40$ mM<br>$\leq 50$ for $H_2O_2$     | 40 mM TMB<br>50 mM $H_2O_2$                                 | Colorimetric assay            | 305 |
| DNA-modified MoS <sub>2</sub>                               | $K_M = 0.6518$ mM for TMB<br>$K_M = 0.0348$ mM for $H_2O_2$         | No inhibition<br>TMB $\leq 3.0$ mM<br>$H_2O_2 \leq 0.40$ mM     | 0.4 mM TMB<br>0.2 mM $H_2O_2$                               | Colorimetric assay            | 306 |
| DNA-modified graphitic C <sub>3</sub> N <sub>4</sub>        | $K_M = 0.11$ mM for TMB<br>$K_M = 4.61$ mM for $H_2O_2$             | No inhibition<br>TMB $\leq 0.8$ mM;                             | 0.5 mM TMB<br>5 mM $H_2O_2$                                 | Colorimetric assay            | 307 |

|                             |                                                                         |                                                                                                 |                                                                 |                    |     |
|-----------------------------|-------------------------------------------------------------------------|-------------------------------------------------------------------------------------------------|-----------------------------------------------------------------|--------------------|-----|
|                             |                                                                         | Inhibited if $\text{H}_2\text{O}_2 > 5$ mM                                                      |                                                                 |                    |     |
| DNA-modified- $\text{WS}_2$ | $K_M = 4.437$ mM for TMB<br>$K_M = 0.702$ mM for $\text{H}_2\text{O}_2$ | No inhibition TMB $\leq 6.0$ mM;<br>$\text{H}_2\text{O}_2 \leq 2$ mM                            | 5 mM TMB<br>2.5 mM $\text{H}_2\text{O}_2$                       | Colorimetric assay | 308 |
| $\text{Fe}_3\text{O}_4$     | Not measured                                                            | No inhibition TMB $\leq 0.07$ mM;<br>$\text{H}_2\text{O}_2 \leq 40$ mM                          | 0.04 mM TMB<br>35 mM $\text{H}_2\text{O}_2$                     | Colorimetric assay | 309 |
| $\text{Au}@Pd$              | Not measured                                                            | Shown for the assay;<br>No inhibition TMB $\leq 0.5$ mM;<br>$\text{H}_2\text{O}_2 \leq 1000$ mM | 0.5 mM TMB<br>1 mM $\text{H}_2\text{O}_2$                       | Colorimetric assay | 310 |
| Cu-MOF                      | Not measured                                                            | Not measured                                                                                    | Not specified                                                   | Colorimetric assay | 311 |
| Au                          | Not measured                                                            | Not measured for TMB;<br>Inhibited if $\text{H}_2\text{O}_2 \geq 1000$ mM                       | TMB not specified<br>50 mM $\text{H}_2\text{O}_2$               | Colorimetric assay | 312 |
| Ag                          | $K_M = 0.053$ mM for TMB<br>$K_M = 6.3$ mM for $\text{H}_2\text{O}_2$   | No inhibition TMB $\leq 0.25$ mM;<br>$\text{H}_2\text{O}_2 \leq 10$ mM                          | 0.25 mM TMB<br>1 mM $\text{H}_2\text{O}_2$                      | Colorimetric assay | 313 |
| $\text{Fe}_3\text{O}_4$     | Not measured                                                            | Not measured                                                                                    | Not specified for o-phenylenediamine and $\text{H}_2\text{O}_2$ | Colorimetric assay | 314 |

|                                |              |                                                                                                            |                                                     |                    |     |
|--------------------------------|--------------|------------------------------------------------------------------------------------------------------------|-----------------------------------------------------|--------------------|-----|
| Au                             | Not measured | Inhibited if ABTS $\geq 0.5$ mM; And H <sub>2</sub> O <sub>2</sub> $\geq 100$ mM                           | 0.5 mM ABTS<br>80 mM H <sub>2</sub> O <sub>2</sub>  | Colorimetric assay | 315 |
| Au                             | Not measured | Inhibited if ABTS $\geq 0.5$ mM; And H <sub>2</sub> O <sub>2</sub> $\geq 40$ mM                            | 0.5 mM ABTS<br>40 mM H <sub>2</sub> O <sub>2</sub>  | Colorimetric assay | 316 |
| Au                             | Not measured | Not measured                                                                                               | Commercial TMB substrate                            | Colorimetric assay | 317 |
| Pt/Pd                          | Not measured | Not measured                                                                                               | Commercial TMB substrate                            | Colorimetric assay | 318 |
| Au                             | Not measured | Shown for the assay; Signal reduced if TMB $\geq 0.75$ mM; And H <sub>2</sub> O <sub>2</sub> $\geq 750$ mM | 0.75 mM TMB<br>750 mM H <sub>2</sub> O <sub>2</sub> | Colorimetric assay | 319 |
| Fe <sub>3</sub> O <sub>4</sub> | Not measured | Shown for the assay, No inhibition TMB $\leq 4$ mM; H <sub>2</sub> O <sub>2</sub> $\leq 40$ mM             | 3 mM TMB<br>20 mM H <sub>2</sub> O <sub>2</sub>     | Colorimetric assay | 320 |
| Hemin-reduced graphene oxide   | Not measured | Shown for the assay; No inhibition TMB $\leq 1$ mM; H <sub>2</sub> O <sub>2</sub> $\leq 20$ mM             | 0.58 mM TMB<br>9.7 mM H <sub>2</sub> O <sub>2</sub> | Colorimetric assay | 321 |

|                                                          |                                                                                                     |                                                                                                         |                                                      |                               |     |
|----------------------------------------------------------|-----------------------------------------------------------------------------------------------------|---------------------------------------------------------------------------------------------------------|------------------------------------------------------|-------------------------------|-----|
| Au                                                       | Not measured                                                                                        | Shown for the assay; No inhibition<br>TMB $\leq$ 4 mM;<br>H <sub>2</sub> O <sub>2</sub> $\leq$ 6000 mM  | 2 mM TMB<br>5000 mM H <sub>2</sub> O <sub>2</sub>    | Colorimetric assay            | 322 |
| ZnFe <sub>2</sub> O <sub>4</sub> /reduced graphene oxide | Not measured                                                                                        | Not measured                                                                                            | Commercial TMB substrate                             | ELISA-like colorimetric assay | 323 |
| Fe <sub>3</sub> O <sub>4</sub>                           | Not measured                                                                                        | Not measured                                                                                            | Commercial TMB substrate                             | ELISA-like colorimetric assay | 324 |
| Cu-MOF                                                   | Not measured                                                                                        | Shown for the assay; No inhibition<br>TMB $\leq$ 0.25 mM;<br>H <sub>2</sub> O <sub>2</sub> $\leq$ 20 mM | 0.08 mM TMB<br>10 mM H <sub>2</sub> O <sub>2</sub>   | Colorimetric assay            | 325 |
| Au@ Fe <sub>3</sub> O <sub>4</sub>                       | K <sub>M</sub> not measured for TMB<br>K <sub>M</sub> =4.27 mM for H <sub>2</sub> O <sub>2</sub>    | Not measured for TMB; No inhibition<br>H <sub>2</sub> O <sub>2</sub> $\leq$ 20 mM                       | 2 mM TMB<br>0.1 mM H <sub>2</sub> O <sub>2</sub>     | Colorimetric assay            | 326 |
| Au-MoS <sub>2</sub>                                      | Not measured                                                                                        | Not measured                                                                                            | 1.25 mM TMB<br>2.21 mM H <sub>2</sub> O <sub>2</sub> | ELISA-like colorimetric assay | 327 |
| Graphene/Fe <sub>3</sub> O <sub>4</sub> /Au              | Not measured                                                                                        | Not measured                                                                                            | 1.25 mM TMB<br>2.21 mM H <sub>2</sub> O <sub>2</sub> | ELISA-like colorimetric assay | 328 |
| Pt                                                       | Not measured                                                                                        | Not measured                                                                                            | Not specified                                        | Colorimetric assay            | 329 |
| Fe <sub>3</sub> O <sub>4</sub> @Au                       | K <sub>M</sub> = 0.8502 mM for TMB<br>K <sub>M</sub> =147.2629 mM for H <sub>2</sub> O <sub>2</sub> | No inhibition<br>TMB $\leq$ 7 mM;<br>H <sub>2</sub> O <sub>2</sub> $\leq$ 800 mM                        | 0.84 mM TMB<br>196 mM H <sub>2</sub> O <sub>2</sub>  | Colorimetric assay            | 330 |
| CoO assembled onto ordered                               | K <sub>M</sub> not measured for TMB                                                                 | No inhibition                                                                                           | 0.7 mM TMB                                           | Colorimetric assay            | 331 |

|                                  |                                                           |                                                              |                                                               |                               |     |
|----------------------------------|-----------------------------------------------------------|--------------------------------------------------------------|---------------------------------------------------------------|-------------------------------|-----|
| mesoporous carbon                | $K_M = 3.29$ mM for $H_2O_2$                              | TMB $\leq 1.0$ mM;<br>$H_2O_2 \leq 5$ mM                     | $H_2O_2$ generated in situ by glucose oxidase                 |                               |     |
| CoFe <sub>2</sub> O <sub>4</sub> | Not measured                                              | Not measured                                                 | DAB commercial kit                                            | Signal amplification in LFIA  | 332 |
| Prussian Blue                    | Not measured                                              | Not measured                                                 | TMB commercial kit                                            | Signal amplification in LFIA  | 333 |
| Ir                               | $K_M = 0.03$ mM for TMB<br>$K_M = 18.02$ mM for $H_2O_2$  | No inhibition<br>TMB $\leq 0.3$ mM;<br>$H_2O_2 \leq 30$ mM   | 0.25 mM TMB<br>$H_2O_2$ generated in situ by xanthine oxidase | Colorimetric assay            | 20  |
| CeO <sub>2</sub>                 | $K_M = 0.147$ mM for TMB<br>$K_M = 293$ mM for $H_2O_2$   | No inhibition<br>TMB $\leq 1.6$ mM;<br>$H_2O_2 \leq 100$ mM  | Not specified                                                 | ELISA-like colorimetric assay | 55  |
| V <sub>2</sub> O <sub>5</sub>    | $K_M = 0.738$ mM for TMB<br>$K_M = 0.232$ mM for $H_2O_2$ | No inhibition<br>TMB $\leq 0.7$ mM;<br>$H_2O_2 \leq 7$ mM    | 0.2 mM TMB<br>$H_2O_2$ generated in situ by glucose oxidase   | Colorimetric assay            | 334 |
| Cu                               | Not measured                                              | Not measured                                                 | 0.5 mM TMB<br>5 mM $H_2O_2$                                   | Colorimetric assay            | 335 |
| Cu                               | $K_M = 0.648$ mM for TMB<br>$K_M = 29.16$ mM for $H_2O_2$ | No inhibition<br>TMB $\leq 1.0$ mM;<br>$H_2O_2 \leq 200$ mM  | 0.5 mM TMB<br>$H_2O_2$ generated in situ by glucose oxidase   | Colorimetric assay            | 14  |
| FeP                              | Not measured                                              | Not measured                                                 | 0.5 mM TMB<br>5 mM $H_2O_2$                                   | Colorimetric assay            | 336 |
| MoS <sub>2</sub>                 | $K_M = 0.005$ mM for TMB<br>$K_M = 0.01$ mM for $H_2O_2$  | No inhibition<br>TMB $\leq 0.30$ mM;<br>$H_2O_2 \leq 400$ mM | 0.5 mM TMB<br>$H_2O_2$ generated in situ by choline oxidase   | Colorimetric assay            | 100 |
| Fe-MOF                           | $K_M = 0.3698$ mM for TMB                                 | Not measured                                                 | Commercial TMB kit                                            | Colorimetric assay            | 337 |

|                    |                                                                |                                                              |                                                                                                                                                                  |                              |     |
|--------------------|----------------------------------------------------------------|--------------------------------------------------------------|------------------------------------------------------------------------------------------------------------------------------------------------------------------|------------------------------|-----|
|                    | $K_M$ not measured for $H_2O_2$                                |                                                              |                                                                                                                                                                  |                              |     |
| Pt                 | $K_M = 0.29$ mM for TMB<br>$K_M = 10.97$ mM for $H_2O_2$       | No inhibition<br>TMB $\leq 0.80$ mM;<br>$H_2O_2 \leq 80$ mM  | Not specified                                                                                                                                                    | Signal amplification in LFIA | 178 |
| Pt-Pd              | Not measured                                                   | Not measured                                                 | Not specified                                                                                                                                                    | Signal amplification in LFIA | 338 |
| Pd                 | Not measured                                                   | Not measured                                                 | Commercial TMB solution<br><br>Or<br><br>5 mM N,N diethyl-p-phenylenediamine sulfate, 4 mM 4-Hydroxy-1-naphthalenesulfonic acid sodium salt with 256 mM $H_2O_2$ | Signal amplification in LFIA | 339 |
| Au@Pt              | $K_M = 0.00243$ mM for TMB<br>$K_M = 0.004076$ mM for $H_2O_2$ | Not measured                                                 | AEC substrate, not specified                                                                                                                                     | Signal amplification in LFIA | 180 |
| $Fe_3O_4@SiO_2@Pt$ | Not measured                                                   | Not measured                                                 | 1.2 mM TMB<br>245 mM $H_2O_2$                                                                                                                                    | Colorimetric assay           | 340 |
| Pt                 | $K_M = 0.127$ mM for TMB<br>$K_M = 61.5$ mM for $H_2O_2$       | No inhibition<br>TMB $\leq 0.20$ mM;<br>$H_2O_2 \leq 200$ mM | 0.5 mM TMB<br>$H_2O_2$ generated in situ by glucose oxidase                                                                                                      | Colorimetric assay           | 182 |
| Pt                 | $K_M = 0.42$ mM for TMB<br>$K_M = 84.07$ mM for $H_2O_2$       | No inhibition<br>TMB $\leq 3.50$ mM;<br>$H_2O_2 \leq 700$ mM | Luminol solution                                                                                                                                                 | Signal amplification in LFIA | 27  |



|                           |                                                                                                                                                                                                                                    |                                                              |                                                            |                               |     |
|---------------------------|------------------------------------------------------------------------------------------------------------------------------------------------------------------------------------------------------------------------------------|--------------------------------------------------------------|------------------------------------------------------------|-------------------------------|-----|
| Fe-N single atom nanozyme | $K_M = 0.3322$ mM for TMB<br>$K_M = 17.12$ mM for $H_2O_2$                                                                                                                                                                         | No inhibition<br>TMB $\leq 1.5$ mM;<br>$H_2O_2 \leq 100$ mM  | TMB not specified                                          | ELISA-like colorimetric assay | 185 |
| Au-Pt                     | $K_M = 0.088$ mM for TMB<br>$K_M = 196$ mM for $H_2O_2$                                                                                                                                                                            | No inhibition<br>TMB $\leq 0.25$ mM;<br>$H_2O_2 \leq 500$ mM | 0.125 mM TMB<br>125 mM $H_2O_2$                            | Colorimetric assay            | 188 |
| Pt                        | $K_M = 0.1274$ mM for TMB<br>$K_M = 1.14$ mM for $H_2O_2$                                                                                                                                                                          | No inhibition<br>TMB $\leq 0.5$ mM;<br>$H_2O_2 \leq 10$ mM   | 0.25 mM TMB<br>1 mM $H_2O_2$                               | Colorimetric assay            | 35  |
| C60-carboxyfullerene      | $K_M = 0.2333$ mM for TMB<br>$K_M = 24.58$ mM for $H_2O_2$                                                                                                                                                                         | No inhibition<br>TMB $\leq 0.2$ mM;<br>$H_2O_2 \leq 300$ mM  | 1 mM TMB<br>$H_2O_2$ generated in situ by glucose oxidase  | Colorimetric assay            | 190 |
| Pd-Pt                     | $K_M = 3.11$ mM for TMB<br>$K_M = 33.40$ mM for $H_2O_2$                                                                                                                                                                           | No inhibition<br>TMB $\leq 20$ mM;                           | Not specified                                              | Signal amplification in LFIA  | 191 |
| Au                        | Synthesized using hydroquinone<br>$K_M = 0.23$ mM for TMB<br>$K_M = 0.16$ mM for $H_2O_2$<br><br>Synthesized using ascorbic acid<br>$K_M = 0.27$ mM for TMB<br>$K_M = 0.20$ mM for $H_2O_2$<br><br>Synthesized using hydroxylamine | No inhibition<br>TMB $\leq 2$ mM;<br>$H_2O_2 \leq 2000$ mM   | Commercial AEC solution supplemented with 1000 mM $H_2O_2$ | Signal amplification in LFIA  | 192 |

|                    |                                                            |                                                               |                                                              |                               |     |
|--------------------|------------------------------------------------------------|---------------------------------------------------------------|--------------------------------------------------------------|-------------------------------|-----|
|                    | $K_M = 0.58$ mM for TMB<br>$K_M = 0.41$ mM for $H_2O_2$    |                                                               |                                                              |                               |     |
| Au@Pt              | $K_M = 0.026$ mM for TMB<br>$K_M = 219$ mM for $H_2O_2$    | No inhibition<br>TMB $\leq 0.25$ mM;<br>$H_2O_2 \leq 1000$ mM | 0.4 mM TMB<br>2 mM $H_2O_2$                                  | ELISA-like colorimetric assay | 42  |
| Au@PtCu            | $K_M = 0.036$ mM for TMB<br>$K_M = 23$ mM for $H_2O_2$     | No inhibition<br>TMB $\leq 0.12$ mM;<br>$H_2O_2 \leq 200$ mM  | 0.4 mM TMB<br>2 mM $H_2O_2$                                  | ELISA-like colorimetric assay |     |
| CuO                | $K_M = 0.016$ mM for TMB<br>$K_M = 41$ mM for $H_2O_2$     | No inhibition<br>TMB $\leq 0.7$ mM;<br>$H_2O_2 \leq 400$ mM   | catalytic oxidation of phenol coupled with 4-amino-atipyrine | Colorimetric assay            | 67  |
| Nanodiamonds       | $K_M = 0.103$ mM for TMB<br>$K_M = 0.752$ mM for $H_2O_2$  | No inhibition<br>TMB $\leq 1.4$ mM;<br>$H_2O_2 \leq 200$ mM   | 1 mM TMB<br>100 mM $H_2O_2$                                  | ELISA-like colorimetric assay | 193 |
| Au@Ag@Pt           | $K_M = 0.130$ mM for TMB<br>$K_M = 0.0583$ mM for $H_2O_2$ | No inhibition<br>TMB $\leq 0.9$ mM;<br>$H_2O_2 \leq 1$ mM     | 0.75 mM TMB<br>$H_2O_2$ generated in situ by glucose oxidase | Colorimetric assay            | 40  |
| LaNiO <sub>3</sub> | $K_M = 0.105$ mM for TMB<br>$K_M = 90.05$ mM for $H_2O_2$  | Shown for the assay<br>No inhibition<br>$H_2O_2 \leq 1.0$ mM; | 0.8 mM TMB<br>$H_2O_2$ generated in situ by glucose oxidase  | Colorimetric assay            | 80  |

|                       |                                                             |                                                                  |                                         |                              |     |
|-----------------------|-------------------------------------------------------------|------------------------------------------------------------------|-----------------------------------------|------------------------------|-----|
| Au-Ag                 | $K_M = 0.396$ mM for TMB<br>$K_M = 94.7$ mM for $H_2O_2$    | No inhibition<br>$TMB \leq 0.8$ mM;<br>$H_2O_2 \leq 200$ mM      | 0.75 mM TMB<br>0.5 mM $H_2O_2$          | SERS registration            | 39  |
| Au@Pt                 | Not measured                                                | Not measured                                                     | Indiamine blue dye                      | Signal amplification in LFIA | 341 |
| Au@Pt                 | Not measured                                                | Not measured                                                     | 5 mM TMB<br>5 mM $H_2O_2$               | Signal amplification in LFIA | 342 |
| Au nanoflowers @Pt    | $K_M = 0.285$ mM for TMB<br>$K_M = 0.341$ mM for $H_2O_2$   | No inhibition<br>$TMB \leq 20$ mM;<br>$H_2O_2 \leq 10$ mM        | Commercial TMB solution                 | Signal amplification in LFIA | 195 |
| Pd@Ir                 | $K_M = 0.246$ mM for TMB<br>$K_M$ not measured for $H_2O_2$ | No inhibition<br>$TMB \leq 0.5$ mM;<br>not measured for $H_2O_2$ | Not specified                           | Signal amplification in LFIA | 343 |
| Fe-tannic acid        | $K_M = 0.152$ mM for TMB<br>$K_M = 3.50$ mM for $H_2O_2$    | No inhibition<br>$TMB \leq 1$ mM;<br>$H_2O_2 \leq 25$ mM         | 24 mM TMB<br>2600 mM $H_2O_2$           | Signal amplification in LFIA | 196 |
| Cu-polydopamine (PDA) | $K_M = 0.172$ mM for TMB<br>$K_M = 0.130$ mM for $H_2O_2$   | Not measured                                                     | 2 mM TMB<br>20 mM $H_2O_2$              | Signal amplification in LFIA | 197 |
| Au@Pt                 | Not measured                                                | Not measured                                                     | Not specified for TMB<br>0.1 % $H_2O_2$ | Signal amplification in LFIA | 344 |

|                             |                                                           |                                                             |                                                         |                              |     |
|-----------------------------|-----------------------------------------------------------|-------------------------------------------------------------|---------------------------------------------------------|------------------------------|-----|
| CuCo@PDA                    | $K_M = 0.8$ mM for TMB<br>$K_M = 17.3$ mM for $H_2O_2$    | No inhibition<br>TMB $\leq 1.5$ mM;<br>$H_2O_2 \leq 50$ mM  | 25 mM TMB<br>5000 mM $H_2O_2$                           | Signal amplification in LFIA | 198 |
| C-Fe@hemin                  | Not measured                                              | Not measured                                                | Commercial luminol substrate supplemented with $H_2O_2$ | Signal amplification in LFIA | 345 |
| Au@Pt                       | Not measured                                              | Not measured                                                | 0.05% DAB,<br>0.03% $H_2O_2$                            | Signal amplification in LFIA | 346 |
| Fe-N-C single atom nanozyme | $K_M = 0.052$ mM for TMB<br>$K_M = 0.191$ mM for $H_2O_2$ | No inhibition<br>TMB $\leq 1.5$ mM;<br>$H_2O_2 \leq 1$ mM   | 0.08 mM TMB<br>0.16 mM $H_2O_2$                         | Signal amplification in LFIA | 199 |
| Pt-MXene                    | Not measured                                              | Not measured                                                | 13.3 mM AEC<br>30 mM $H_2O_2$                           | Signal amplification in LFIA | 347 |
| Au@Pd                       | $K_M = 0.45$ mM for TMB<br>$K_M = 5.53$ mM for $H_2O_2$   | No inhibition<br>TMB $\leq 2.0$ mM;<br>$H_2O_2 \leq 100$ mM | 4 mM TMB<br>490 mM $H_2O_2$                             | Signal amplification in LFIA | 200 |
| Au@Pt                       | Not measured                                              | Not measured                                                | AEC substrate, not specified                            | Signal amplification in LFIA | 348 |
| Au@Pt                       | Not measured                                              | Not measured                                                | 1 mM TMB<br>160 mM $H_2O_2$                             | Signal amplification in LFIA | 349 |

|                                        |                                                                                                   |                                                                                             |                                                                                           |                              |     |
|----------------------------------------|---------------------------------------------------------------------------------------------------|---------------------------------------------------------------------------------------------|-------------------------------------------------------------------------------------------|------------------------------|-----|
| Au@Pt                                  | Not measured                                                                                      | Not measured                                                                                | Not specified                                                                             | Signal amplification in LFIA | 350 |
| Fe <sub>3</sub> O <sub>4</sub>         | Not measured                                                                                      | Not measured                                                                                | 5 mg/mL DAB<br>15% H <sub>2</sub> O <sub>2</sub>                                          | Signal amplification in LFIA | 351 |
| Fe <sub>3</sub> O <sub>4</sub>         | Not measured                                                                                      | Not measured                                                                                | 0.19 mg/mL DAB<br>0.57% H <sub>2</sub> O <sub>2</sub>                                     | Signal amplification in LFIA | 352 |
| Pt                                     | K <sub>M</sub> not measured for TMB<br>K <sub>M</sub> = 7.04 mM for H <sub>2</sub> O <sub>2</sub> | Shown for the assay;<br>Inhibited if DAB ≥ 2.5 mM and H <sub>2</sub> O <sub>2</sub> ≥ 25 mM | 2 mM DAB<br>20 mM H <sub>2</sub> O <sub>2</sub>                                           | Signal amplification in LFIA | 353 |
| Au@Ag-Pt                               | K <sub>M</sub> = 0.0502 for TMB<br>K <sub>M</sub> not measured for H <sub>2</sub> O <sub>2</sub>  | No inhibition<br>TMB ≤ 0.6 mM;<br>Not measured for H <sub>2</sub> O <sub>2</sub>            | Commercial TMB substrate solution supplemented with 2000 mM H <sub>2</sub> O <sub>2</sub> | Signal amplification in LFIA | 354 |
| Fe <sub>3</sub> O <sub>4</sub> @PDA@Pt | K <sub>M</sub> = 0.178 mM for TMB<br>K <sub>M</sub> = 0.459 mM for H <sub>2</sub> O <sub>2</sub>  | No inhibition<br>TMB ≤ 0.8 mM;<br>H <sub>2</sub> O <sub>2</sub> ≤ 3 mM                      | TMB substrate solution not specified                                                      | Signal amplification in LFIA | 355 |
| Au@Pd@Pt                               | K <sub>M</sub> = 0.065 mM for TMB<br>K <sub>M</sub> = 4.59 mM for H <sub>2</sub> O <sub>2</sub>   | No inhibition<br>TMB ≤ 0.20 mM;<br>H <sub>2</sub> O <sub>2</sub> ≤ 8 mM                     | Commercial TMB substrate solution supplemented                                            | Signal amplification in LFIA | 201 |

|                                    |                                                                                                    |                                                                                                  |                                                                   |                               |     |
|------------------------------------|----------------------------------------------------------------------------------------------------|--------------------------------------------------------------------------------------------------|-------------------------------------------------------------------|-------------------------------|-----|
| Pd@Pt                              | Not measured                                                                                       | Not measured                                                                                     | TMB substrate not specified                                       | Signal amplification in LFIA  | 356 |
| Prussian Blue                      | Not measured                                                                                       | Not measured                                                                                     | 0.4 mM TMB<br>Not specified for H <sub>2</sub> O <sub>2</sub>     | ELISA-like colorimetric assay | 357 |
| Au@Pt                              | Not measured                                                                                       | Not measured                                                                                     | Commercial TMB substrate                                          | Signal amplification in LFIA  | 358 |
| NiCo <sub>2</sub> O <sub>4</sub>   | Not measured                                                                                       | Shown for the assay;<br>No inhibition<br>TMB ≤ 40 mM and<br>H <sub>2</sub> O <sub>2</sub> ≤ 25 % | 20 mM TMB<br>25 % H <sub>2</sub> O <sub>2</sub>                   | Signal amplification in LFIA  | 359 |
| Au@Pt                              | Not measured                                                                                       | Not measured                                                                                     | 15 mM TMB<br>2000 mM H <sub>2</sub> O <sub>2</sub>                | Signal amplification in LFIA  | 360 |
| Fe <sub>3</sub> O <sub>4</sub> @Pt | K <sub>M</sub> = 0.055 mM for TMB<br>K <sub>M</sub> not measured for H <sub>2</sub> O <sub>2</sub> | Not measured                                                                                     | 3.8 mM AEC<br>0.3 % H <sub>2</sub> O <sub>2</sub>                 | Signal amplification in LFIA  | 361 |
| Pt                                 | Not measured                                                                                       | Not measured                                                                                     | 14.6 mM TMB<br>80 mM H <sub>2</sub> O <sub>2</sub>                | Signal amplification in LFIA  | 362 |
| Au-Pt                              | Not measured                                                                                       | Not measured                                                                                     | AEC commercial substrate<br>3267 mM H <sub>2</sub> O <sub>2</sub> | Signal amplification in LFIA  | 363 |

|                    |                                                             |                                                                                             |                                                       |                               |     |
|--------------------|-------------------------------------------------------------|---------------------------------------------------------------------------------------------|-------------------------------------------------------|-------------------------------|-----|
| Fe-N-C single atom | $K_M = 0.08$ mM for TMB<br>$K_M = 28.30$ mM for $H_2O_2$    | No inhibition<br>$TMB \leq 10$ mM;<br>$H_2O_2 \leq 100$ mM                                  | Not specified TMB solution                            | ELISA-like colorimetric assay | 202 |
| Au@Pt              | Not measured                                                | Not measured                                                                                | DAB commercial kit supplemented with 4000 mM $H_2O_2$ | Signal amplification in LFIA  | 364 |
| Pt                 | Not measured                                                | No inhibition<br>$TMB \leq 0.8$ mM;<br>$H_2O_2 \leq 800$ mM                                 | 0.5 mM TMB<br>100 mM $H_2O_2$                         | ELISA-like colorimetric assay | 365 |
| Au@Pt              | Not measured                                                | Shown for the assay;<br>Inhibited if $TMB \geq 0.8$ mM<br>Inhibited if $H_2O_2 \geq 600$ mM | 730 mM TMB<br>620 mM $H_2O_2$                         | Colorimetric assay            | 366 |
| Au@Pt              | Not measured                                                | Not measured                                                                                | TMB commercial kit supplemented with 2000 mM $H_2O_2$ | Signal amplification in LFIA  | 367 |
| Au@Ir              | $K_M = 0.906$ mM for TMB<br>$K_M$ not measured for $H_2O_2$ | No inhibition<br>$TMB \leq 0.8$ mM;<br>Not measured for $H_2O_2$                            | TMB commercial kit supplemented with 200 mM $H_2O_2$  | Signal amplification in LFIA  | 368 |
| Pt-Ir              | $K_M = 0.38$ mM for TMB<br>$K_M = 4.13$ mM for $H_2O_2$     | No inhibition<br>$TMB \leq 1.6$ mM;<br>$H_2O_2 \leq 25$ mM                                  | AEC not specified<br>250 mM $H_2O_2$                  | Signal amplification in LFIA  | 203 |

|                                                    |                                                                                  |                                                                                       |                                                       |                               |     |
|----------------------------------------------------|----------------------------------------------------------------------------------|---------------------------------------------------------------------------------------|-------------------------------------------------------|-------------------------------|-----|
| Au/Fe <sub>3</sub> O <sub>4</sub>                  | $K_M = 0.702$ mM for DAB<br>$K_M = 1.172$ mM for H <sub>2</sub> O <sub>2</sub>   | No inhibition<br>DAB $\leq 1.0$ mM;<br>H <sub>2</sub> O <sub>2</sub> $\leq 1$ mM      | 0.5 mM DAB<br>0.5 mM H <sub>2</sub> O <sub>2</sub>    | Signal amplification in LFIA  | 369 |
| Pd <sub>x</sub> Hg <sub>y</sub> (PdO) <sub>z</sub> | $K_M = 0.03$ mM for TMB<br>$K_M = 0.04$ mM for H <sub>2</sub> O <sub>2</sub>     | No inhibition<br>TMB $\leq 0.2$ mM;<br>H <sub>2</sub> O <sub>2</sub> $\leq 0.012$ mM  | 0.2 mM TMB<br>200 mM H <sub>2</sub> O <sub>2</sub>    | Signal amplification in LFIA  | 370 |
| Au@Pt                                              | Not measured                                                                     | Not measured                                                                          | 0.921 mM TMB<br>7630 mM H <sub>2</sub> O <sub>2</sub> | Colorimetric assay            | 371 |
| Fe <sub>3</sub> O <sub>4</sub> @PDA @Pd/Pt         | $K_M = 0.036$ mM for TMB<br>$K_M$ not measured for H <sub>2</sub> O <sub>2</sub> | No inhibition<br>TMB $\leq 1$ mM;<br>Not measured for H <sub>2</sub> O <sub>2</sub>   | DAB substrate, not specified                          | Signal amplification in LFIA  | 372 |
| VS <sub>2</sub>                                    | $K_M = 0.4$ mM for TMB<br>$K_M = 0.772$ mM for H <sub>2</sub> O <sub>2</sub>     | No inhibition<br>TMB $\leq 1$ mM;<br>5 mM H <sub>2</sub> O <sub>2</sub>               | 15% H <sub>2</sub> O <sub>2</sub>                     | Signal amplification in LFIA  | 373 |
| Pd-Ir                                              | $K_M = 0.2$ mM for TMB<br>$K_M$ not measured for H <sub>2</sub> O <sub>2</sub>   | No inhibition<br>TMB $\leq 0.6$ mM;<br>Not measured for H <sub>2</sub> O <sub>2</sub> | 0.72 mM TMB<br>1818 mM H <sub>2</sub> O <sub>2</sub>  | ELISA-like colorimetric assay | 374 |
| Au@Pt                                              | Not measured                                                                     | Not measured                                                                          | Commercial DAB substrate                              | Signal amplification in LFIA  | 375 |



|                                      |                                                              |                                                                                                |                                                             |                               |     |
|--------------------------------------|--------------------------------------------------------------|------------------------------------------------------------------------------------------------|-------------------------------------------------------------|-------------------------------|-----|
| Fe-single atom nanozyme              | $K_M = 0.24$ mM for TMB<br>$K_M = 16.28$ mM for $H_2O_2$     | No inhibition<br>TMB $\leq 2$ mM;<br>100 mM $H_2O_2$                                           | Not specified                                               | Signal amplification in LFIA  | 204 |
| Pt on polymer nanospheres            | $K_M = 0.3742$ mM for TMB<br>$K_M$ not measured for $H_2O_2$ | No inhibition<br>TMB $\leq 0.5$ mM;<br>Not measured for $H_2O_2$                               | Not specified                                               | ELISA-like colorimetric assay | 376 |
| Au@Pd                                | Not measured                                                 | Shown for the assay;<br>No inhibition<br>TMB $\leq 2.4$ mM<br>Inhibited if $H_2O_2 \geq 40$ mM | 1 mM TMB<br>40 mM $H_2O_2$                                  | Colorimetric assay            | 377 |
| Au                                   | $K_M = 0.0251$ mM for TMB<br>$K_M = 0.229$ mM for $H_2O_2$   | No inhibition<br>TMB $\leq 5$ mM;<br>$H_2O_2 \leq 5000$ mM                                     | Commercial TMB substrate supplemented with $H_2O_2$         | Colorimetric assay            | 150 |
| Au@Pt                                | Not measured                                                 | Not measured                                                                                   | Not specified                                               | Colorimetric assay            | 378 |
| Au@Pt                                | Not measured                                                 | Not measured                                                                                   | Commercial TMB substrate                                    | Colorimetric assay            | 379 |
| Ti <sub>3</sub> C <sub>2</sub> MXene | $K_M = 0.196$ mM for TMB<br>$K_M = 0.007$ mM for $H_2O_2$    | No inhibition<br>TMB $\leq 1$ mM;                                                              | 0.5 mM TMB<br>$H_2O_2$ generated in situ by glucose oxidase | Colorimetric assay            | 380 |

|       |                                                                                                                                                                                    |                                                                                                               |                                              |                               |     |
|-------|------------------------------------------------------------------------------------------------------------------------------------------------------------------------------------|---------------------------------------------------------------------------------------------------------------|----------------------------------------------|-------------------------------|-----|
|       |                                                                                                                                                                                    | $\text{H}_2\text{O}_2 \leq 100 \text{ mM}$                                                                    |                                              |                               |     |
| Ag/Pt | Not measured                                                                                                                                                                       | Shown for the assay;<br>No inhibition<br>$\text{H}_2\text{O}_2 \leq 100 \text{ mM}$ ;<br>Not measured for TMB | 0.8 mM TMB<br>50 mM $\text{H}_2\text{O}_2$   | ELISA-like colorimetric assay | 381 |
| Au@Pt | Not measured                                                                                                                                                                       | Not measured                                                                                                  | Commercial DAB substrate                     | Signal amplification in LFIA  | 382 |
| Au    | Not measured                                                                                                                                                                       | Not measured                                                                                                  | 3.59 mM TMB<br>115 mM $\text{H}_2\text{O}_2$ | Colorimetric assay            | 383 |
| FeOOH | $K_M = 0.41 \text{ mM}$ for TMB<br>$K_M = 4.08 \text{ mM}$ for $\text{H}_2\text{O}_2$<br><br>$K_M = 0.47 \text{ mM}$ for TMB<br>$K_M = 3.97 \text{ mM}$ for $\text{H}_2\text{O}_2$ | No inhibition<br>TMB and ABTS $\leq 1.8 \text{ mM}$ ;<br>$\text{H}_2\text{O}_2 \leq 2 \text{ mM}$             | 2 mM TMB<br>1.8 mM $\text{H}_2\text{O}_2$    | Signal amplification in LFIA  | 205 |
| Au    | $K_M = 3.59 \text{ mM}$ for TMB<br>$K_M = 16.71 \text{ mM}$ for $\text{H}_2\text{O}_2$                                                                                             | No inhibition<br>TMB $\leq 1 \text{ mM}$ ;<br>$\text{H}_2\text{O}_2 \leq 300 \text{ mM}$ ;                    | 0.18 mM TMB<br>90 mM $\text{H}_2\text{O}_2$  | Colorimetric assay            | 6   |

|                       |                                                            |                                                                                         |                                                           |                               |                |
|-----------------------|------------------------------------------------------------|-----------------------------------------------------------------------------------------|-----------------------------------------------------------|-------------------------------|----------------|
| Au                    | $K_M = 0.0411$ mM for TMB<br>$K_M = 167$ mM for $H_2O_2$   | No inhibition<br>TMB $\leq$ 0.25 mM;<br>$H_2O_2 \leq$ 180 mM;                           | 0.2 mM TMB<br>100 mM $H_2O_2$                             | Colorimetric assay            | <sup>9</sup>   |
| Au                    | $K_M = 0.20$ mM for TMB<br>$K_M = 572.98$ mM for $H_2O_2$  | Shown for the assay;<br>No inhibition<br>$H_2O_2 \leq$ 1200 mM;<br>Not measured for TMB | 0.00207 TMB<br>1.32 mM $H_2O_2$                           | ELISA-like colorimetric assay | <sup>12</sup>  |
| Glutathione-Pd        | $K_M = 0.068$ mM for TMB<br>$K_M = 156$ mM for $H_2O_2$    | No inhibition<br>TMB $\leq$ 0.15 mM;<br>$H_2O_2 \leq$ 180 mM;                           | 0.12 mM TMB<br>125 mM $H_2O_2$                            | Colorimetric assay            | <sup>21</sup>  |
| Prussian Blue         | $K_M = 0.76$ mM for TMB<br>$K_M = 840$ mM for $H_2O_2$     | No inhibition<br>TMB $\leq$ 0.5 mM;<br>$H_2O_2 \leq$ 1000 mM;                           | 0.5 mM TMB<br>125 mM $H_2O_2$                             | ELISA-like colorimetric assay | <sup>117</sup> |
| WSe <sub>2</sub>      | $K_M = 0.0433$ mM for TMB<br>$K_M = 19.53$ mM for $H_2O_2$ | No inhibition<br>TMB $\leq$ 1 mM;<br>$H_2O_2 \leq$ 100 mM;                              | 1 mM TMB<br>$H_2O_2$ generated in situ by glucose oxidase | Colorimetric assay            | <sup>121</sup> |
| Au@Cu <sub>x</sub> OS | $K_M = 0.265$ mM for TMB<br>$K_M = 0.159$ mM for $H_2O_2$  | No inhibition<br>TMB $\leq$ 0.9 mM;<br>$H_2O_2 \leq$ 25 mM;                             | 0.4 mM TMB<br>$H_2O_2$ concentration was varied           | Colorimetric assay            | <sup>126</sup> |

|                                                      |                                                                                                  |                                                                          |                                                                                   |                    |     |
|------------------------------------------------------|--------------------------------------------------------------------------------------------------|--------------------------------------------------------------------------|-----------------------------------------------------------------------------------|--------------------|-----|
| Au@TiO <sub>2</sub>                                  | K <sub>M</sub> = 1.09 mM for TMB<br>K <sub>M</sub> = 0.29 mM for H <sub>2</sub> O <sub>2</sub>   | No inhibition<br>TMB ≤ 0.8 mM;<br>H <sub>2</sub> O <sub>2</sub> ≤ 10 mM; | 2 mM TMB<br>H <sub>2</sub> O <sub>2</sub> generated in situ by glucose oxidase    | Colorimetric assay | 133 |
| C <sub>3</sub> O <sub>4</sub> @CeO <sub>2</sub>      | K <sub>M</sub> = 0.140 mM for TMB<br>K <sub>M</sub> = 7.09 mM for H <sub>2</sub> O <sub>2</sub>  | No inhibition<br>TMB ≤ 1 mM;<br>H <sub>2</sub> O <sub>2</sub> ≤ 150 mM   | 0.18 mM TMB<br>H <sub>2</sub> O <sub>2</sub> generated in situ by glucose oxidase | Colorimetric assay | 139 |
| Co <sub>3</sub> O <sub>4</sub> /graphene oxide       | K <sub>M</sub> = 0.19 mM for TMB<br>K <sub>M</sub> = 24.04 mM for H <sub>2</sub> O <sub>2</sub>  | No inhibition<br>TMB ≤ 0.8 mM;<br>H <sub>2</sub> O <sub>2</sub> ≤ 500 mM | 0.05 mM TMB<br>H <sub>2</sub> O <sub>2</sub> generated in situ by glucose oxidase | Colorimetric assay | 140 |
| Cu-hemin                                             | K <sub>M</sub> = 1.42 mM for TMB<br>K <sub>M</sub> = 2.18 mM for H <sub>2</sub> O <sub>2</sub>   | No inhibition<br>TMB ≤ 0.8 mM;<br>H <sub>2</sub> O <sub>2</sub> ≤ 10 mM  | 0.5 mM TMB<br>H <sub>2</sub> O <sub>2</sub> generated in situ by glucose oxidase  | Colorimetric assay | 142 |
| Cu-C <sub>3</sub> N <sub>4</sub>                     | K <sub>M</sub> = 0.389 mM for TMB<br>K <sub>M</sub> = 9.27 mM for H <sub>2</sub> O <sub>2</sub>  | No inhibition<br>TMB ≤ 8 mM;<br>H <sub>2</sub> O <sub>2</sub> ≤ 5 mM     | 0.8 mM TMB<br>H <sub>2</sub> O <sub>2</sub> generated in situ by glucose oxidase  | Colorimetric assay | 144 |
| Fe <sub>2</sub> O <sub>3</sub> /SiO <sub>2</sub>     | K <sub>M</sub> = 3.05 mM for TMB<br>K <sub>M</sub> = 965.98 mM for H <sub>2</sub> O <sub>2</sub> | No inhibition<br>TMB ≤ 1 mM;<br>H <sub>2</sub> O <sub>2</sub> ≤ 2200 mM  | 0.5 mM TMB<br>H <sub>2</sub> O <sub>2</sub> generated in situ by glucose oxidase  | Colorimetric assay | 149 |
| Fe <sub>3</sub> O <sub>4</sub> @SiO <sub>2</sub> @Au | K <sub>M</sub> = 5.71 mM for TMB<br>K <sub>M</sub> = 2.05 mM for H <sub>2</sub> O <sub>2</sub>   |                                                                          | 6.5 mM TMB<br>H <sub>2</sub> O <sub>2</sub> generated in situ by glucose oxidase  | Colorimetric assay | 155 |

|       |                                                                                      |                                                                                                       |                                                                 |                               |              |
|-------|--------------------------------------------------------------------------------------|-------------------------------------------------------------------------------------------------------|-----------------------------------------------------------------|-------------------------------|--------------|
| Au@Pt | $K_M = 0.21 \text{ mM}$ for TMB<br>$K_M = 540 \text{ mM}$ for $\text{H}_2\text{O}_2$ | Inhibited if TMB $\geq 0.5 \text{ mM}$ ;<br>No inhibition $\text{H}_2\text{O}_2 \leq 4000 \text{ mM}$ | $0.5 \text{ mM}$ TMB<br>$500 \text{ mM}$ $\text{H}_2\text{O}_2$ | ELISA-like colorimetric assay | This article |
|-------|--------------------------------------------------------------------------------------|-------------------------------------------------------------------------------------------------------|-----------------------------------------------------------------|-------------------------------|--------------|

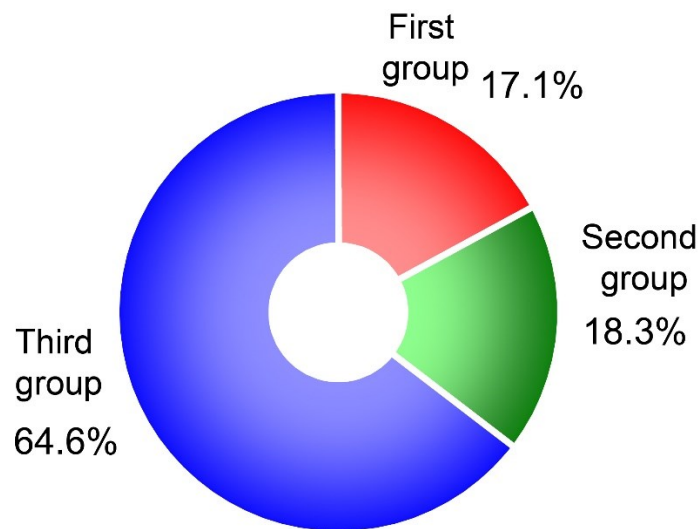

**Fig.S2.** Distribution of analyzed papers (Table S3) into three groups. The articles that used substrates concentrations within recommended range ( $0.5 \times K_m \leq \text{substrates concentrations} \leq 5 \times K_m$ ) were assigned to the first group. The articles that used substrates in higher concentrations (substrates concentrations  $\gg 5 \times K_m$ ) without substrate inhibition were assigned to the second group. The articles that used substrates in low (substrate concentration  $< 0.5 \times K_m$ ) or high (substrate concentration  $> 5 \times K_m$ , without the confirmation of the absence of inhibition) concentrations, did not measure kinetic parameters, utilized commercial substrates or used different substrates for kinetic measurements and assay performance were assigned to third group.

## S6. Nanozyme titration

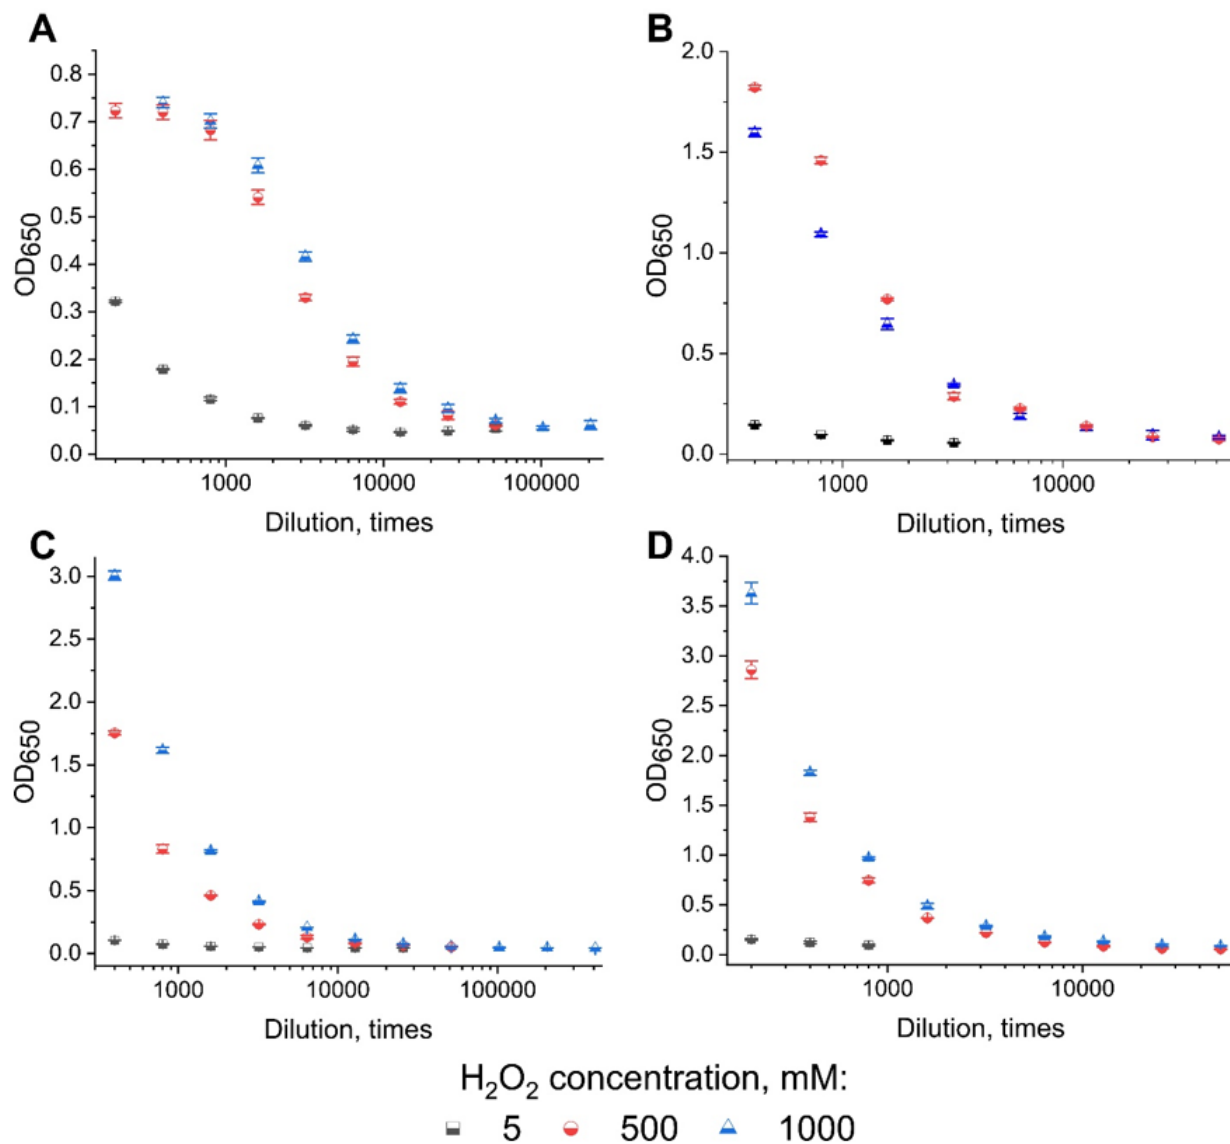

**Fig. S3.** Optical density at 650 nm (TMB<sub>ox</sub>) versus nanozyme dilution after 5 min incubation. TMB concentration was varied: (A) 0.2 mM, (B) 0.5 mM, (C) 1.0 mM, (D) 1.5 mM. All measurements were performed in three repeats. Mean values of OD<sub>650</sub> and the standard deviations after 5 min were calculated and plotted. Catalytic reaction and measurements were performed at 30°C. Measurements were performed in 20 mM sodium acetate buffer.

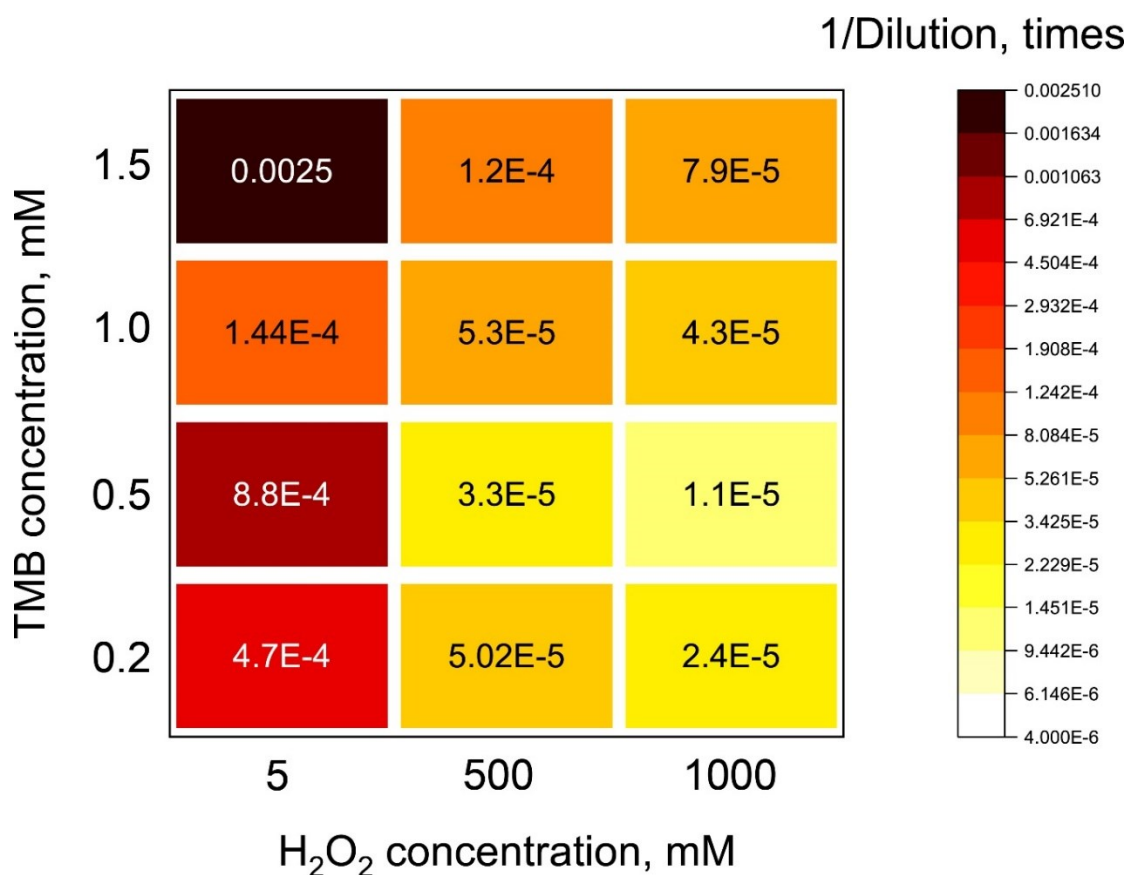

**Fig. S4.** Effect of TMB and H<sub>2</sub>O<sub>2</sub> concentrations on the lowest detectable dilution of Au@Pt nanozyme. All measurements were performed in three repeats. Catalytic reaction and measurements were performed at 30°C. Measurements were performed in 20 mM sodium acetate buffer. The lowest detectable dilution was determined as the dilution of Au@Pt nanozyme facilitating OD<sub>650</sub> higher than the mean value of the negative control (substrate solution without Au@Pt nanozyme) plus three standard deviations of a blank.



## References

- 1 G. FRENS, *Nat. Phys. Sci.*, 1973, **241**, 20–22.
- 2 M. N. Karim, S. R. Anderson, S. Singh, R. Ramanathan and V. Bansal, *Biosens. Bioelectron.*, 2018, **110**, 8–15.
- 3 J. Shah and S. Singh, *3 Biotech*, 2018, **8**, 67.
- 4 Y. Zhao, Y. Huang, H. Zhu, Q. Zhu and Y. Xia, *J. Am. Chem. Soc.*, 2016, **138**, 16645–16654.
- 5 H. Zhao, Z. Wang, X. Jiao, L. Zhang and Y. Lv, *Spectrosc. Lett.*, 2012, **45**, 511–519.
- 6 L. Hu, H. Liao, L. Feng, M. Wang and W. Fu, *Anal. Chem.*, 2018, **90**, 6247–6252.
- 7 X. Jiang, C. Sun, Y. Guo, G. Nie and L. Xu, *Biosens. Bioelectron.*, 2015, **64**, 165–170.
- 8 X. Wang, Q. Wu, Z. Shan and Q. Huang, *Biosens. Bioelectron.*, 2011, **26**, 3614–3619.
- 9 Y. Chang, Z. Zhang, J. Hao, W. Yang and J. Tang, *Sensors Actuators B Chem.*, 2016, **232**, 692–697.
- 10 D. Hu, Z. Sheng, S. Fang, Y. Wang, D. Gao, P. Zhang, P. Gong, Y. Ma and L. Cai, *Theranostics*, 2014, **4**, 142–153.
- 11 Y. Liu, C. Wang, N. Cai, S. Long and F. Yu, *J. Mater. Sci.*, 2014, **49**, 7143–7150.
- 12 D. Lou, Y. Tian, Y. Zhang, J. Yin, T. Yang, C. He, M. Ma, W. Yu and N. Gu, *J. Nanosci. Nanotechnol.*, 2018, **18**, 951–958.
- 13 Y. Liu, Y. Xiang, D. Ding and R. Guo, *RSC Adv.*, 2016, **6**, 112435–112444.
- 14 L. Hu, Y. Yuan, L. Zhang, J. Zhao, S. Majeed and G. Xu, *Anal. Chim. Acta*, 2013, **762**, 83–86.
- 15 Y. Zhong, C. Deng, Y. He, Y. Ge and G. Song, *Microchim. Acta*, 2016, **183**, 2823–2830.
- 16 N. Wang, B. Li, F. Qiao, J. Sun, H. Fan and S. Ai, *J. Mater. Chem. B*, 2015, **3**, 7718–7723.
- 17 F. Zarif, S. Rauf, M. Z. Qureshi, N. S. Shah, A. Hayat, N. Muhammad, A. Rahim, M. H. Nawaz and M. Nasir, *Microchim. Acta*, 2018, **185**, 302.
- 18 W. Zhang, X. Liu, D. Walsh, S. Yao, Y. Kou and D. Ma, *Small*, 2012, **8**, 2948–2953.
- 19 H. Su, D. D. Liu, M. Zhao, W. L. Hu, S. S. Xue, Q. Cao, X. Y. Le, L. N. Ji and Z. W. Mao, *ACS Appl. Mater. Interfaces*, 2015, **7**, 8233–8242.
- 20 M. Cui, J. Zhou, Y. Zhao and Q. Song, *Sensors Actuators B Chem.*, 2017, **243**, 203–210.
- 21 Y. Fu, H. Zhang, S. Dai, X. Zhi, J. Zhang and W. Li, *Analyst*, 2015, **140**, 6676–6683.
- 22 J. Wei, X. Chen, S. Shi, S. Mo and N. Zheng, *Nanoscale*, 2015, **7**, 19018–19026.
- 23 L. Rastogi, D. Karunasagar, R. Sashidhar and A. Giri, *Sensors Actuators B Chem.*, 2017, **240**, 1182–1188.
- 24 G.-W. Wu, S.-B. He, H.-P. Peng, H.-H. Deng, A.-L. Liu, X.-H. Lin, X.-H. Xia and W. Chen, *Anal. Chem.*, 2014, **86**, 10955–10960.

- 25 L. Jin, Z. Meng, Y. Zhang, S. Cai, Z. Zhang, C. Li, L. Shang and Y. Shen, *ACS Appl. Mater. Interfaces*, 2017, **9**, 10027–10033.
- 26 X. Xia, J. Zhang, N. Lu, M. J. Kim, K. Ghale, Y. Xu, E. McKenzie, J. Liu and H. Ye, *ACS Nano*, 2015, **9**, 9994–10004.
- 27 J. M. Park, H. W. Jung, Y. W. Chang, H. S. Kim, M. J. Kang and J. C. Pyun, *Anal. Chim. Acta*, 2015, **853**, 360–367.
- 28 W. Li, H. Zhang, J. Zhang and Y. Fu, *Anal. Methods*, 2015, **7**, 4464–4471.
- 29 J. Fan, J. Yin, B. Ning, X. Wu, Y. Hu, M. Ferrari, G. J. Anderson, J. Wei, Y. Zhao and G. Nie, *Biomaterials*, 2011, **32**, 1611–1618.
- 30 W. Li, B. Chen, H. Zhang, Y. Sun, J. Wang, J. Zhang and Y. Fu, *Biosens. Bioelectron.*, 2015, **66**, 251–258.
- 31 S. Bin He, H. H. Deng, A. L. Liu, G. W. Li, X. H. Lin, W. Chen and X. H. Xia, *ChemCatChem*, 2014, **6**, 1543–1548.
- 32 K. Cai, Z. Lv, K. Chen, L. Huang, J. Wang, F. Shao, Y. Wang and H. Han, *Chem. Commun.*, 2013, **49**, 6024.
- 33 Y. Fu, X. Zhao, J. Zhang and W. Li, *J. Phys. Chem. C*, 2014, **118**, 18116–18125.
- 34 Y. Liu, Y. Zheng, D. Ding and R. Guo, *Langmuir*, 2017, **33**, 13811–13820.
- 35 A. J. Kora and L. Rastogi, *Sensors Actuators, B Chem.*, 2018, **254**, 690–700.
- 36 T. G. Choleva, V. A. Gatselou, G. Z. Tsogas and D. L. Giokas, *Microchim. Acta*, 2018, **185**, 22.
- 37 G. Cao, X. Jiang, H. Zhang, T. R. Croley and J. Yin, *RSC Adv.*, 2017, **7**, 52210–52217.
- 38 H. Ye, J. Mohar, Q. Wang, M. Catalano, M. J. Kim and X. Xia, *Sci. Bull.*, 2016, **61**, 1739–1745.
- 39 J. Li, G. Zhang, L. Wang, A. Shen and J. Hu, *Talanta*, 2015, **140**, 204–211.
- 40 J. Li, L. Lv, G. Zhang, X. Zhou, A. Shen and J. Hu, *Anal. Methods*, 2016, **8**, 2097–2105.
- 41 L. Long, J. Liu, K. Lu, T. Zhang, Y. Xie, Y. Ji and X. Wu, *J. Nanobiotechnology*, 2018, **16**, 46.
- 42 X. Hu, A. Saran, S. Hou, T. Wen, Y. Ji, W. Liu, H. Zhang and X. Wu, *Chinese Sci. Bull.*, 2014, **59**, 2588–2596.
- 43 N. Pan, W. Li-Ying, L.-L. Wu, C.-F. Peng and Z.-J. Xie, *Microchim. Acta*, 2017, **184**, 65–72.
- 44 Y. Chen, H. Cao, W. Shi, H. Liu and Y. Huang, *Chem. Commun.*, 2013, **49**, 5013.
- 45 Y. Ding, B. Yang, H. Liu, Z. Liu, X. Zhang, X. Zheng and Q. Liu, *Sensors Actuators B Chem.*, 2018, **259**, 775–783.
- 46 Q. Wang, L. Zhang, C. Shang, Z. Zhang and S. Dong, *Chem. Commun.*, 2016, **52**, 5410–5413.
- 47 T. Jiang, Y. Song, D. Du, X. Liu and Y. Lin, *ACS Sensors*, 2016, **1**, 717–724.
- 48 S. Ge, W. Liu, H. Liu, F. Liu, J. Yu, M. Yan and J. Huang, *Biosens. Bioelectron.*, 2015, **71**, 456–462.

- 49 L. Chen, B. Sun, X. Wang, F. Qiao and S. Ai, *J. Mater. Chem. B*, 2013, **1**, 2268.
- 50 L. Chen, K. Sun, P. Li, X. Fan, J. Sun and S. Ai, *Nanoscale*, 2013, **5**, 10982.
- 51 R. Cai, D. Yang, X. Chen, Y. Huang, Y. Lyu, J. He, M. Shi, I.-T. Teng, S. Wan, W. Hou and W. Tan, *J. Mater. Chem. B*, 2016, **4**, 4657–4661.
- 52 R. Cai, D. Yang, S. Peng, X. Chen, Y. Huang, Y. Liu, W. Hou, S. Yang, Z. Liu and W. Tan, *J. Am. Chem. Soc.*, 2015, **137**, 13957–13963.
- 53 C. Ray, S. Dutta, S. Sarkar, R. Sahoo, A. Roy and T. Pal, *J. Mater. Chem. B*, 2014, **2**, 6097.
- 54 X. Jiao, H. Song, H. Zhao, W. Bai, L. Zhang and Y. Lv, *Anal. Methods*, 2012, **4**, 3261.
- 55 Z. Tian, J. Li, Z. Zhang, W. Gao, X. Zhou and Y. Qu, *Biomaterials*, 2015, **59**, 116–124.
- 56 D. Jampaiah, T. Srinivasa Reddy, A. E. Kandjani, P. R. Selvakannan, Y. M. Sabri, V. E. Coyle, R. Shukla and S. K. Bhargava, *J. Mater. Chem. B*, 2016, **4**, 3874–3885.
- 57 Q. Liu, Y. Ding, Y. Yang, L. Zhang, L. Sun, P. Chen and C. Gao, *Mater. Sci. Eng. C*, 2016, **59**, 445–453.
- 58 Q. Liu, Y. Yang, X. Lv, Y. Ding, Y. Zhang, J. Jing and C. Xu, *Sensors Actuators B Chem.*, 2017, **240**, 726–734.
- 59 K. Zhang, W. Zuo, Z. Wang, J. Liu, T. Li, B. Wang and Z. Yang, *RSC Adv.*, 2015, **5**, 10632–10640.
- 60 T. Zhang, C. Cao, X. Tang, Y. Cai, C. Yang and Y. Pan, *Nanotechnology*, 2017, **28**, 045704.
- 61 J. Mu, Y. Wang, M. Zhao and L. Zhang, *Chem. Commun.*, 2012, **48**, 2540.
- 62 Y. Ding, M. Chen, K. Wu, M. Chen, L. Sun, Z. Liu, Z. Shi and Q. Liu, *Mater. Sci. Eng. C*, 2017, **80**, 558–565.
- 63 J. Yin, H. Cao and Y. Lu, *J. Mater. Chem.*, 2012, **22**, 527–534.
- 64 Q. Wang, S. Liu, H. Sun and Q. Lu, *Ind. Eng. Chem. Res.*, 2014, **53**, 7917–7922.
- 65 J. Mu, L. Zhang, G. Zhao and Y. Wang, *Phys. Chem. Chem. Phys.*, 2014, **16**, 15709.
- 66 Q. Liu, R. Zhu, H. Du, H. Li, Y. Yang, Q. Jia and B. Bian, *Mater. Sci. Eng. C*, 2014, **43**, 321–329.
- 67 W. Chen, J. Chen, Y. Bin Feng, L. Hong, Q. Y. Chen, L. F. Wu, X. H. Lin and X. H. Xia, *Analyst*, 2012, **137**, 1706–1712.
- 68 W. Chen, J. Chen, A. Liu, L. Wang, G. Li and X. Lin, *ChemCatChem*, 2011, **3**, 1151–1154.
- 69 M. Chen, Y. Ding, Y. Gao, X. Zhu, P. Wang, Z. Shi and Q. Liu, *RSC Adv.*, 2017, **7**, 25220–25228.
- 70 S. Tanaka, Y. V. Kaneti, R. Bhattacharjee, M. N. Islam, R. Nakahata, N. Abdullah, S. Yusa, N. Nguyen, M. J. A. Shiddiky, Y. Yamauchi and M. S. A. Hossain, *ACS Appl. Mater. Interfaces*, 2018, **10**, 1039–1049.
- 71 A. Roy, R. Sahoo, C. Ray, S. Dutta and T. Pal, *RSC Adv.*, 2016, **6**, 32308–32318.
- 72 Y. Pan, N. Li, J. Mu, R. Zhou, Y. Xu, D. Cui, Y. Wang and M. Zhao, *Appl. Microbiol. Biotechnol.*, 2015, **99**, 703–715.

- 73 S. Chen, M. Chi, Y. Zhu, M. Gao, C. Wang and X. Lu, *Appl. Surf. Sci.*, 2018, **440**, 237–244.
- 74 H. Zhu, Y. Hu, G. Jiang and G. Shen, *Eur. Food Res. Technol.*, 2011, **233**, 881–887.
- 75 L. Gao, J. Zhuang, L. Nie, J. Zhang, Y. Zhang, N. Gu, T. Wang, J. Feng, D. Yang, S. Perrett and X. Yan, *Nat. Nanotechnol.*, 2007, **2**, 577–583.
- 76 Q. Liu, H. Li, Q. Zhao, R. Zhu, Y. Yang, Q. Jia, B. Bian and L. Zhuo, *Mater. Sci. Eng. C*, 2014, **41**, 142–151.
- 77 Y. Wu, M. Song, Z. Xin, X. Zhang, Y. Zhang, C. Wang, S. Li and N. Gu, *Nanotechnology*, 2011, **22**, 225703.
- 78 H. Y. Shin, B.-G. Kim, S. Cho, J. Lee, H. Bin Na and M. Il Kim, *Microchim. Acta*, 2017, **184**, 2115–2122.
- 79 K. Wang, J. Song, X. Duan, J. Mu and Y. Wang, *New J. Chem.*, 2017, **41**, 8554–8560.
- 80 X. Wang, W. Cao, L. Qin, T. Lin, W. Chen, S. Lin, J. Yao, X. Zhao, M. Zhou, C. Hang and H. Wei, *Theranostics*, 2017, **7**, 2277–2286.
- 81 L. Su, W. Qin, H. Zhang, Z. U. Rahman, C. Ren, S. Ma and X. Chen, *Biosens. Bioelectron.*, 2015, **63**, 384–391.
- 82 D. Bhattacharya, A. Baksi, I. Banerjee, R. Ananthakrishnan, T. K. Maiti and P. Pramanik, *Talanta*, 2011, **86**, 337–348.
- 83 Y. Wang, X. Zhang, Z. Luo, X. Huang, C. Tan, H. Li, B. Zheng, B. Li, Y. Huang, J. Yang, Y. Zong, Y. Ying and H. Zhang, *Nanoscale*, 2014, **6**, 12340–12344.
- 84 C. Jeyaraj Pandian, R. Palanivel and U. Balasundaram, *J. Photochem. Photobiol. B Biol.*, 2017, **174**, 58–69.
- 85 H. Deng, W. Shen, Y. Peng, X. Chen, G. Yi and Z. Gao, *Chem. – A Eur. J.*, 2012, **18**, 8906–8911.
- 86 L. Zhang, L. Han, P. Hu, L. Wang and S. Dong, *Chem. Commun.*, 2013, **49**, 10480.
- 87 G. Nie, L. Zhang, J. Lei, L. Yang, Z. Zhang, X. Lu and C. Wang, *J. Mater. Chem. A*, 2014, **2**, 2910.
- 88 H. Yang, J. Zha, P. Zhang, Y. Xiong, L. Su and F. Ye, *RSC Adv.*, 2016, **6**, 66963–66970.
- 89 J. Mu, J. Li, X. Zhao, E. Yang and X. Zhao, *Sensors Actuators B Chem.*, 2018, **258**, 32–41.
- 90 X. Niu, Y. He, J. Pan, X. Li, F. Qiu, Y. Yan, L. Shi, H. Zhao and M. Lan, *Anal. Chim. Acta*, 2016, **947**, 42–49.
- 91 H. Zou, T. Yang, J. Lan and C. Huang, *Anal. Methods*, 2017, **9**, 841–846.
- 92 A. K. Dutta, S. K. Maji, D. N. Srivastava, A. Mondal, P. Biswas, P. Paul and B. Adhikary, *ACS Appl. Mater. Interfaces*, 2012, **4**, 1919–1927.
- 93 S. K. Maji, A. K. Dutta, P. Biswas, D. N. Srivastava, P. Paul, A. Mondal and B. Adhikary, *Appl. Catal. A Gen.*, 2012, **419–420**, 170–177.
- 94 Z. Dai, S. Liu, J. Bao and H. Ju, *Chem. – A Eur. J.*, 2009, **15**, 4321–4326.
- 95 C. Ding, Y. Yan, D. Xiang, C. Zhang and Y. Xian, *Microchim. Acta*, 2016, **183**, 625–631.

- 96 W. Yao, H. Zhu, W. Li, H. Yao, Y. Wu and S. Yu, *Chempluschem*, 2013, **78**, 723–727.
- 97 T. Lin, L. Zhong, L. Guo, F. Fu and G. Chen, *Nanoscale*, 2014, **6**, 11856–11862.
- 98 K. Zhao, W. Gu, S. Zheng, C. Zhang and Y. Xian, *Talanta*, 2015, **141**, 47–52.
- 99 J. Yu, X. Ma, W. Yin and Z. Gu, *RSC Adv.*, 2016, **6**, 81174–81183.
- 100 N. R. Nirala, Vinita and R. Prakash, *Microchim. Acta*, 2018, **185**, 224.
- 101 Y. Lu, J. Yu, W. Ye, X. Yao, P. Zhou, H. Zhang, S. Zhao and L. Jia, *Microchim. Acta*, 2016, **183**, 2481–2489.
- 102 L. Huang, W. Zhu, W. Zhang, K. Chen, J. Wang, R. Wang, Q. Yang, N. Hu, Y. Suo and J. Wang, *Microchim. Acta*, 2018, **185**, 7.
- 103 Q. Chen, J. Chen, C. Gao, M. Zhang, J. Chen and H. Qiu, *Analyst*, 2015, **140**, 2857–2863.
- 104 T. Lin, L. Zhong, Z. Song, L. Guo, H. Wu, Q. Guo, Y. Chen, F. Fu and G. Chen, *Biosens. Bioelectron.*, 2014, **62**, 302–307.
- 105 Q. Liu, P. Chen, Z. Xu, M. Chen, Y. Ding, K. Yue and J. Xu, *Sensors Actuators B Chem.*, 2017, **251**, 339–348.
- 106 Z. Xiang, Y. Wang, P. Ju and D. Zhang, *Microchim. Acta*, 2016, **183**, 457–463.
- 107 Y. Wang, D. Zhang and J. Wang, *Microchim. Acta*, 2018, **185**, 1.
- 108 T. M. Chen, J. Xiao and G. W. Yang, *RSC Adv.*, 2016, **6**, 70124–70132.
- 109 H. Yang, J. Zha, P. Zhang, Y. Qin, T. Chen and F. Ye, *Sensors Actuators B Chem.*, 2017, **247**, 469–478.
- 110 Y.-Z. Li, T. Li, W. Chen and Y. Song, *ACS Appl. Mater. Interfaces*, 2017, **9**, 29881–29888.
- 111 T. Zhang, Y. Lu and G. Luo, *ACS Appl. Mater. Interfaces*, 2014, **6**, 14433–14438.
- 112 W. Yang, J. Hao, Z. Zhang and B. Zhang, *J. Colloid Interface Sci.*, 2015, **460**, 55–60.
- 113 A. K. Dutta, S. K. Maji, A. Mondal, B. Karmakar, P. Biswas and B. Adhikary, *Sensors Actuators B Chem.*, 2012, **173**, 724–731.
- 114 K. Aneesh, C. S. R. Vusa and S. Berchmans, *Analyst*, 2016, **141**, 4024–4028.
- 115 Y. Wang, D. Zhang and Z. Xiang, *Mater. Res. Bull.*, 2015, **67**, 152–157.
- 116 X. Huang, J. Wei, T. Liu, X. Zhang, S. Bai and H. Yang, *Nanoscale*, 2017, **9**, 17193–17198.
- 117 V. Čunderlová, A. Hlaváček, V. Horňáková, M. Peterek, D. Němeček, A. Hampl, L. Eyer and P. Skládal, *Microchim. Acta*, 2016, **183**, 651–658.
- 118 W. Zhang, S. Hu, J. Yin, W. He, W. Lu, M. Ma, N. Gu and Y. Zhang, *J. Am. Chem. Soc.*, 2016, **138**, 5860–5865.
- 119 L. Su, Y. Xiong, H. Yang, P. Zhang and F. Ye, *J. Mater. Chem. B*, 2016, **4**, 128–134.
- 120 N. Li, Y. Yan, B. Xia, J.-Y. Wang and X. Wang, *Biosens. Bioelectron.*, 2014, **54**, 521–527.

- 121 T. M. Chen, X. J. Wu, J. X. Wang and G. W. Yang, *Nanoscale*, 2017, **9**, 11806–11813.
- 122 J. Chen, Y. Liu, G. Zhu and A. Yuan, *Cryst. Res. Technol.*, 2014, **49**, 309–314.
- 123 S. Kumar, P. Bhushan and S. Bhattacharya, *RSC Adv.*, 2017, **7**, 37568–37577.
- 124 L. Fan, X. Xu, C. Zhu, J. Han, L. Gao, J. Xi and R. Guo, *ACS Appl. Mater. Interfaces*, 2018, **10**, 4502–4511.
- 125 S. Bhagat, N. V. Srikanth Vallabani, V. Shutthanandan, M. Bowden, A. S. Karakoti and S. Singh, *J. Colloid Interface Sci.*, 2018, **513**, 831–842.
- 126 H. Liu, M. Jiao, C. Gu and M. Zhang, *J. Alloys Compd.*, 2018, **741**, 197–204.
- 127 M. K. Masud, S. Yadav, M. N. Islam, N. Nguyen, C. Salomon, R. Kline, H. R. Alamri, Z. A. Allothman, Y. Yamauchi, M. S. A. Hossain and M. J. A. Shiddiky, *Anal. Chem.*, 2017, **89**, 11005–11013.
- 128 M. Liu, H. Zhao, S. Chen, H. Yu and X. Quan, *ACS Nano*, 2012, **6**, 3142–3151.
- 129 M. Liu, H. Zhao, S. Chen, H. Yu and X. Quan, *Chem. Commun.*, 2012, **48**, 7055.
- 130 X. Chen, X. Tian, B. Su, Z. Huang, X. Chen and M. Oyama, *Dalt. Trans.*, 2014, **43**, 7449–7454.
- 131 Y. Tao, Y. Lin, Z. Huang, J. Ren and X. Qu, *Adv. Mater.*, 2013, **25**, 2594–2599.
- 132 Y. Tao, E. Ju, J. Ren and X. Qu, *Adv. Mater.*, 2015, **27**, 1097–1104.
- 133 X. Peng, G. Wan, L. Wu, M. Zeng, S. Lin and G. Wang, *Sensors Actuators B Chem.*, 2018, **257**, 166–177.
- 134 Y. Zhang, Y. Wang, X. Sun, L. Chen and Z. Xu, *Sensors Actuators B Chem.*, 2017, **246**, 118–126.
- 135 S. Chen, M. Chi, Z. Yang, M. Gao, C. Wang and X. Lu, *Inorg. Chem. Front.*, 2017, **4**, 1621–1627.
- 136 J. Mu, X. Zhao, J. Li, E. Yang and X. Zhao, *Mater. Sci. Eng. C*, 2017, **74**, 434–442.
- 137 J. Hao, Z. Zhang, W. Yang, B. Lu, X. Ke, B. Zhang and J. Tang, *J. Mater. Chem. A*, 2013, **1**, 4352.
- 138 C. O. Song, J. W. Lee, H. S. Choi and J. K. Kang, *RSC Adv.*, 2013, **3**, 20179.
- 139 D. Jampaiah, T. Srinivasa Reddy, V. E. Coyle, A. Nafady and S. K. Bhargava, *J. Mater. Chem. B*, 2017, **5**, 720–730.
- 140 J. Xie, H. Cao, H. Jiang, Y. Chen, W. Shi, H. Zheng and Y. Huang, *Anal. Chim. Acta*, 2013, **796**, 92–100.
- 141 G. Darabdhara, B. Sharma, M. R. Das, R. Boukherroub and S. Szunerits, *Sensors Actuators B Chem.*, 2017, **238**, 842–851.
- 142 F. Liu, J. He, M. Zeng, J. Hao, Q. Guo, Y. Song and L. Wang, *J. Nanoparticle Res.*, 2016, **18**, 106.
- 143 H. Tan, C. Ma, L. Gao, Q. Li, Y. Song, F. Xu, T. Wang and L. Wang, *Chem. – A Eur. J.*, 2014, **20**, 16377–16383.
- 144 N. Wang, Z. Han, H. Fan and S. Ai, *RSC Adv.*, 2015, **5**, 91302–91307.
- 145 J. Zhu, W. Nie, Q. Wang, J. Li, H. Li, W. Wen, T. Bao, H. Xiong, X. Zhang and S. Wang, *Carbon N. Y.*,

- 2018, **129**, 29–37.
- 146 X. Wang, Q. Han, S. Cai, T. Wang, C. Qi, R. Yang and C. Wang, *Analyst*, 2017, **142**, 2500–2506.
- 147 S. Wu, H. Huang, X. Feng, C. Du and W. Song, *Talanta*, 2017, **167**, 385–391.
- 148 N. S. Surgutskaya, M. E. Trusova, G. B. Slepchenko, A. S. Minin, A. G. Pershina, M. A. Uimin, A. E. Yermakov and P. S. Postnikov, *Anal. Methods*, 2017, **9**, 2433–2439.
- 149 C. Lu, X. Liu, Y. Li, F. Yu, L. Tang, Y. Hu and Y. Ying, *ACS Appl. Mater. Interfaces*, 2015, **7**, 15395–15402.
- 150 S. Oh, J. Kim, V. T. Tran, D. K. Lee, S. R. Ahmed, J. C. Hong, J. Lee, E. Y. Park and J. Lee, *ACS Appl. Mater. Interfaces*, 2018, **10**, 12534–12543.
- 151 Q. An, C. Sun, D. Li, K. Xu, J. Guo and C. Wang, *ACS Appl. Mater. Interfaces*, 2013, **5**, 13248–13257.
- 152 Y. Jiang, N. Song, C. Wang, N. Pinna and X. Lu, *J. Mater. Chem. B*, 2017, **5**, 5499–5505.
- 153 F. Huang, J. Wang, W. Chen, Y. Wan, X. Wang, N. Cai, J. Liu and F. Yu, *J. Taiwan Inst. Chem. Eng.*, 2018, **83**, 40–49.
- 154 M. Il Kim, J. Shim, T. Li, J. Lee and H. G. Park, *Chem. – A Eur. J.*, 2011, **17**, 10700–10707.
- 155 S. Luo, Y. Liu, H. Rao, Y. Wang and X. Wang, *Anal. Biochem.*, 2017, **538**, 26–33.
- 156 Y. Dong, J. Li, L. Shi and Z. Guo, *ACS Appl. Mater. Interfaces*, 2015, **7**, 15403–15413.
- 157 L. Song, C. Huang, W. Zhang, M. Ma, Z. Chen, N. Gu and Y. Zhang, *Colloids Surfaces A Physicochem. Eng. Asp.*, 2016, **506**, 747–755.
- 158 Y. Dong, H. Zhang, Z. U. Rahman, L. Su, X. Chen, J. Hu and X. Chen, *Nanoscale*, 2012, **4**, 3969.
- 159 L. Liu, B. Du, C. Shang, J. Wang and E. Wang, *Anal. Chim. Acta*, 2018, **1014**, 77–84.
- 160 L. Li, C. Zeng, L. Ai and J. Jiang, *J. Alloys Compd.*, 2015, **639**, 470–477.
- 161 Y. Guo, L. Deng, J. Li, S. Guo, E. Wang and S. Dong, *ACS Nano*, 2011, **5**, 1282–1290.
- 162 J. Peng and J. Weng, *Biosens. Bioelectron.*, 2017, **89**, 652–658.
- 163 J. Lei, X. Lu, G. Nie, Z. Jiang and C. Wang, *Part. Part. Syst. Character.*, 2015, **32**, 886–892.
- 164 S. Cai, Q. Han, C. Qi, Z. Lian, X. Jia, R. Yang and C. Wang, *Nanoscale*, 2016, **8**, 3685–3693.
- 165 C. Qi, S. Cai, X. Wang, J. Li, Z. Lian, S. Sun, R. Yang and C. Wang, *RSC Adv.*, 2016, **6**, 54949–54955.
- 166 X. Niu, Y. He, W. Zhang, X. Li, F. Qiu and J. Pan, *Sensors Actuators B Chem.*, 2018, **256**, 151–159.
- 167 X.-Q. Zhang, S.-W. Gong, Y. Zhang, T. Yang, C.-Y. Wang and N. Gu, *J. Mater. Chem.*, 2010, **20**, 5110.
- 168 Y. He, X. Niu, L. Shi, H. Zhao, X. Li, W. Zhang, J. Pan, X. Zhang, Y. Yan and M. Lan, *Microchim. Acta*, 2017, **184**, 2181–2189.
- 169 S. Cai, X. Liu, Q. Han, C. Qi, R. Yang and C. Wang, *Nano Res.*, 2018, **11**, 3272–3281.

- 170 W. Shi, H. Fan, S. Ai and L. Zhu, *RSC Adv.*, 2015, **5**, 32183–32190.
- 171 Z. Li, X. Yang, Y. Yang, Y. Tan, Y. He, M. Liu, X. Liu and Q. Yuan, *Chem. – A Eur. J.*, 2018, **24**, 409–415.
- 172 L. Y. Chau, Q. He, A. Qin, S. P. Yip and T. M. H. Lee, *J. Mater. Chem. B*, 2016, **4**, 4076–4083.
- 173 W. Zhang, X. Niu, X. Li, Y. He, H. Song, Y. Peng, J. Pan, F. Qiu, H. Zhao and M. Lan, *Sensors Actuators B Chem.*, 2018, **265**, 412–420.
- 174 W. Shi, H. Fan, S. Ai and L. Zhu, *Sensors Actuators B Chem.*, 2015, **221**, 1515–1522.
- 175 S. Kandula and P. Jeevanandam, *RSC Adv.*, 2015, **5**, 5295–5306.
- 176 M. Ma, J. Xie, Y. Zhang, Z. Chen and N. Gu, *Mater. Lett.*, 2013, **105**, 36–39.
- 177 L. Zhang, H. Deng, F.-L. Lin, X. Xu, S. Weng, A. Liu, X. Lin, X. Xia and W. Chen, *Anal. Chem.*, 2014, **86**, 2711–2718.
- 178 H. Yang, Q. He, Y. Chen, D. Shen, H. Xiao, S. A. Eremin, X. Cui and S. Zhao, *Microchim. Acta*, , DOI:10.1007/s00604-020-04528-9.
- 179 S. Cai, X. Jia, Q. Han, X. Yan, R. Yang and C. Wang, *Nano Res.*, 2017, **10**, 2056–2069.
- 180 D. Wei, X. Zhang, B. Chen and K. Zeng, *Anal. Chim. Acta*, 2020, **1126**, 106–113.
- 181 L. Su, J. Feng, X. Zhou, C. Ren, H. Li and X. Chen, *Anal. Chem.*, 2012, **84**, 5753–5758.
- 182 G. Wang, L. Feng, W. Li, J. Zhang and Y. Fu, *Microchim. Acta*, 2019, **186**, 1–9.
- 183 C. Ge, R. Wu, Y. Chong, G. Fang, X. Jiang, Y. Pan, C. Chen and J. J. Yin, *Adv. Funct. Mater.*, 2018, **28**, 1–11.
- 184 Y. Liu, G. Zhu, J. Yang, A. Yuan and X. Shen, *PLoS One*, 2014, **9**, 3–9.
- 185 Z. Lyu, S. Ding, N. Zhang, Y. Zhou, N. Cheng, M. Wang, M. Xu, Z. Feng, X. Niu, Y. Cheng, C. Zhang, D. Du and Y. Lin, *Research*.
- 186 N. R. Nirala, S. Abraham, V. Kumar, A. Bansal, A. Srivastava and P. S. Saxena, *Sensors Actuators B Chem.*, 2015, **218**, 42–50.
- 187 S. E. Son, P. K. Gupta, W. Hur, H. Choi, H. B. Lee, Y. Park and G. H. Seong, *Anal. Chim. Acta*, 2020, **1134**, 41–49.
- 188 Y. Sun, J. Wang, W. Li, J. Zhang, Y. Zhang and Y. Fu, *Biosens. Bioelectron.*, 2015, **74**, 1038–1046.
- 189 Y.-W. Wang, M. Wang, L. Wang, H. Xu, S. Tang, H.-H. Yang, L. Zhang and H. Song, *Sensors*, 2017, **17**, 2521.
- 190 R. Li, M. Zhen, M. Guan, D. Chen, G. Zhang, J. Ge, P. Gong, C. Wang and C. Shu, *Biosens. Bioelectron.*, 2013, **47**, 502–507.
- 191 J. Han, L. Zhang, L. Hu, K. Xing, X. Lu, Y. Huang, J. Zhang, W. Lai and T. Chen, *J. Dairy Sci.*, 2018, **101**, 5770–5779.
- 192 J. Fu, Y. Zhou, X. Huang, W. Zhang, Y. Wu, H. Fang, C. Zhang and Y. Xiong, *J. Agric. Food Chem.*, 2020, **68**, 1118–1125.



- 193 T. M. Chen, X. M. Tian, L. Huang, J. Xiao and G. W. Yang, *Nanoscale*, 2017, **9**, 15673–15684.
- 194 C. P. Liu, K. C. Chen, C. F. Su, P. Y. Yu and P. W. Lee, *Catalysts*, , DOI:10.3390/catal9060517.
- 195 W. Qiao, B. He, J. Yang, W. Ren, R. Zhao, Y. Zhang, C. Bai, Z. Suo, Y. Xu, M. Wei and H. Jin, *Int. J. Biol. Macromol.*, 2024, **254**, 127746.
- 196 S. Liu, R. Shu, J. Ma, L. Dou, W. Zhang, S. Wang, Y. Ji, Y. Li, J. Xu, D. Zhang, M. Zhu, Y. Song and J. Wang, *Chem. Eng. J.*, 2022, **446**, 137382.
- 197 M. Liang, X. Cai, Y. Gao, H. Yan, J. Fu, X. Tang, Q. Zhang and P. Li, *Biosens. Bioelectron.*, 2022, **213**, 114435.
- 198 X. Zhu, J. Tang, X. Ouyang, Y. Liao, H. Feng, J. Yu, L. Chen, Y. Lu, Y. Yi and L. Tang, *J. Hazard. Mater.*, 2024, **465**, 133178.
- 199 X. Cai, F. Ma, J. Jiang, X. Yang, Z. Zhang, Z. Jian, M. Liang, P. Li and L. Yu, *J. Hazard. Mater.*, 2023, **441**, 129853.
- 200 N. Yao, X. Li, Y. Tian, Z. Huang and Y. Duan, *Sensors Actuators B Chem.*, 2023, **379**, 133247.
- 201 Y. Sun, Z. Xie, F. Pei, W. Hu, S. Feng, Q. Hao, B. Liu, X. Mu, W. Lei and Z. Tong, *Anal. Methods*, 2022, **14**, 5091–5099.
- 202 X. Niu, Q. Shi, W. Zhu, D. Liu, H. Tian, S. Fu, N. Cheng, S. Li, J. N. Smith, D. Du and Y. Lin, *Biosens. Bioelectron.*, 2019, **142**, 111495.
- 203 H. Yang, Q. He, J. Pan, D. Shen, H. Xiao, X. Cui and S. Zhao, *Analyst*, 2021, **146**, 2726–2733.
- 204 Z. Lyu, S. Ding, P. Tieu, L. Fang, X. Li, T. Li, X. Pan, M. H. Engelhard, X. Ruan, D. Du, S. Li and Y. Lin, *Research*, 2022, **2022**, 9823290.
- 205 D. Yang, L. Lei, K. Yang, K. Gao, T. Jia, L. Wang, X. Wang and C. Xue, *Microchim. Acta*, 2022, **189**, 58.
- 206 O. D. Hendrickson, E. A. Zvereva, V. G. Panferov, O. N. Solopova, A. V Zherdev, P. G. Sveshnikov and B. B. Dzantiev, *Biosensors*, 2022, **12**, 1137.
- 207 V. G. Panferov, I. V. Safenkova, A. V. Zherdev and B. B. Dzantiev, *Talanta*, 2021, **225**, 121961.
- 208 V. G. Panferov, N. A. Byzova, A. V Zherdev and B. B. Dzantiev, *Microchim. Acta*, 2021, **188**, 309.
- 209 O. D. Hendrickson, E. A. Zvereva, B. B. Dzantiev and A. V. Zherdev, *Foods*, 2023, **12**, 4252.
- 210 M. Tian, W. Xie, T. Zhang, Y. Liu, Z. Lu, C. M. Li and Y. Liu, *Sensors Actuators B Chem.*, 2020, **309**, 127728.
- 211 J. Liang, Z. Liu, Y. Fang, X. Shen, Z. Xu, H. Lei, X. Huang and X. Li, *Food Chem.*, 2023, **417**, 135897.
- 212 T. Zhang, X. Ma, D. Zhang, Z. Xu, M. Ma and F. Shi, *World J. Microbiol. Biotechnol.*, 2023, **39**, 23.
- 213 Z. Wang, X. Yao, Y. Zhang, R. Wang, Y. Ji, J. Sun, D. Zhang and J. Wang, *Food Chem.*, 2020, **329**, 127224.
- 214 S. Liu, L. Dou, X. Yao, W. Zhang, M. Zhao, X. Yin, J. Sun, D. Zhang and J. Wang, *Biosens. Bioelectron.*, 2020, **169**, 112610.

- 215 N.-S. Li, Y.-T. Chen, Y.-P. Hsu, H.-H. Pang, C.-Y. Huang, Y.-L. Shiue, K.-C. Wei and H.-W. Yang, *Biosens. Bioelectron.*, 2020, **164**, 112309.
- 216 C. Zheng, Q. Jiang, K. Wang, T. Li, W. Zheng, Y. Cheng, Q. Ning and D. Cui, *Analyst*, 2022, **147**, 1678–1687.
- 217 Z. Gao, M. Xu, L. Hou, G. Chen and D. Tang, *Anal. Chim. Acta*, 2013, **776**, 79–86.
- 218 W. He, Y. Liu, J. Yuan, J. J. Yin, X. Wu, X. Hu, K. Zhang, J. Liu, C. Chen, Y. Ji and Y. Guo, *Biomaterials*, 2011, **32**, 1139–1147.
- 219 Y. Chen, L. Jiao, H. Yan, W. Xu, Y. Wu, L. Zheng, W. Gu and C. Zhu, *Anal. Chem.*, 2021, **93**, 12353–12359.
- 220 O. Adegoke, S. Zolotovskaya, A. Abdolvand and N. N. Daeid, *Talanta*, 2020, **216**, 120990.
- 221 R. Zhang, N. Lu, J. Zhang, R. Yan, J. Li, L. Wang, N. Wang, M. Lv and M. Zhang, *Biosens. Bioelectron.*, 2020, **150**, 111881.
- 222 M. Nazifi, A. M. Ramezani, G. Absalan and R. Ahmadi, *Sensors Actuators B Chem.*, 2021, **332**, 129459.
- 223 S.-B. He, F.-Q. Chen, L.-F. Xiu, H.-P. Peng, H.-H. Deng, A.-L. Liu, W. Chen and G.-L. Hong, *Anal. Bioanal. Chem.*, 2020, **412**, 499–506.
- 224 Z. Gao, L. Hou, M. Xu and D. Tang, *Sci. Rep.*, 2014, **4**, 3966.
- 225 J. Zhang, Z. Tan, W. Leng, Y.-C. Chen, S. Zhang, B. T. W. Lo, K. K. L. Yung and Y.-K. Peng, *Chem. Commun.*, 2020, **56**, 7897–7900.
- 226 L. Zhang, Z. Huang, Y. Han, Z. Guo, X. Zhang, R. Xie and W. Yang, *Appl. Surf. Sci.*, 2020, **532**, 147457.
- 227 H. Choi, S. E. Son, W. Hur, V.-K. Tran, H. B. Lee, Y. Park, D. K. Han and G. H. Seong, *Sci. Rep.*, 2020, **10**, 9513.
- 228 Q. Zhang, S. Zheng, J. Zhang, W. Li and Y. Fu, *Catal. Letters*, 2021, **151**, 2537–2546.
- 229 A. Jiao, L. Xu, Y. Tian, Q. Cui, X. Liu and M. Chen, *Talanta*, 2021, **225**, 121990.
- 230 S. Cai, Z. Fu, W. Xiao, Y. Xiong, C. Wang and R. Yang, *ACS Appl. Mater. Interfaces*, 2020, **12**, 11616–11624.
- 231 H. Sun, X. Liu, X. Wang, Q. Han, C. Qi, Y. Li, C. Wang, Y. Chen and R. Yang, *Microchim. Acta*, 2020, **187**, 110.
- 232 Q. Wang, G. Hong, Y. Liu, J. Hao and S. Liu, *RSC Adv.*, 2020, **10**, 25209–25213.
- 233 X. Liu, Q. Wang, H. Zhao, L. Zhang, Y. Su and Y. Lv, *Analyst*, 2012, **137**, 4552.
- 234 F. Shi, M. Peng, H. Zhu, H. Li, J. Li, X. Hu, J. Zeng and Z. Yang, *Anal. Chem.*, 2023, **95**, 14516–14520.
- 235 P. Weerathunge, R. Ramanathan, V. A. Torok, K. Hodgson, Y. Xu, R. Goodacre, B. K. Behera and V. Bansal, *Anal. Chem.*, 2019, **91**, 3270–3276.
- 236 Y. Zhu, J. Wu, L. Han, X. Wang, W. Li, H. Guo and H. Wei, *Anal. Chem.*, 2020, **92**, 7444–7452.

- 237 S. Chen, Z. Yu, Y. Wang, J. Tang, Y. Zeng, X. Liu and D. Tang, *Anal. Chem.*, 2023, **95**, 14494–14501.
- 238 P. Weerathunge, R. Ramanathan, R. Shukla, T. K. Sharma and V. Bansal, *Anal. Chem.*, 2014, **86**, 11937–11941.
- 239 L. Zhang, Y. Chen, N. Cheng, Y. Xu, K. Huang, Y. Luo, P. Wang, D. Duan and W. Xu, *Anal. Chem.*, 2017, **89**, 10194–10200.
- 240 Z. Li, J. Hu, Y. Zhan, Z. Shao, M. Gao, Q. Yao, Z. Li, S. Sun and L. Wang, *Anal. Chem.*, 2023, **95**, 6417–6424.
- 241 X. Huang, L. Chen, W. Zhi, R. Zeng, G. Ji, H. Cai, J. Xu, J. Wang, S. Chen, Y. Tang, J. Zhang, H. Zhou and P. Sun, *Anal. Chem.*, 2023, **95**, 13101–13112.
- 242 X. Ruan, D. Liu, X. Niu, Y. Wang, C. D. Simpson, N. Cheng, D. Du and Y. Lin, *Anal. Chem.*, 2019, **91**, 13847–13854.
- 243 X. Zhu, J. Tang, X. Ouyang, Y. Liao, H. Feng, J. Yu, L. Chen, Y. Lu, Y. Yi and L. Tang, *Anal. Chem.*, 2022, **94**, 16768–16777.
- 244 Y. Fu, Z. Zhao, Y. Shi, K. Xu, J. Zhang, H. Niu and Y. Xu, *Biosens. Bioelectron.*, 2022, **210**, 114272.
- 245 X. Zhang, G. Han, R. Zhang, Z. Huang, H. Shen, P. Su, J. Song and Y. Yang, *ACS Appl. Bio Mater.*, 2020, **3**, 1469–1480.
- 246 M. Sun, S. Huang, G. Su, X. Wang, Z. Lu, Y. Wang, T. Liu, Y. Jiang, C. Song and H. Rao, *Chem. Eng. J.*, 2022, **437**, 134414.
- 247 S. C. Wu, T. T. Tsai, T. H. Li, C. Y. Tung, P. Y. Chiu, J. H. Lin and C. F. Chen, *Biosens. Bioelectron.*, 2022, **216**, 114669.
- 248 H. Yang, Q. He, J. Pan, M. Lin, Z. Lao, Q. Li, X. Cui and S. Zhao, *Sensors Actuators B Chem.*, 2022, **351**, 130905.
- 249 G.-Y. Chen, L.-X. Chen, J. Gao, C. Chen, J. Guan, Z. Cao, Y. Hu and F.-Q. Yang, *Biosensors*, 2023, **13**, 959.
- 250 J. Ju, L. Li, B. Li, S. Regmi, T. Wang, J. Xu, C. Li and S. Tang, *Biosensors*, 2023, **13**, 927.
- 251 S. Xu, S. Zhang, Y. Li and J. Liu, *Molecules*, , DOI:10.3390/molecules28166064.
- 252 C. Li, Z. Guo, S. Pu, C. Zhou, X. Cheng, R. Zhao and N. Jia, *Biosensors*, 2023, **13**, 800.
- 253 S. Gao, K. Liu, X. Ji, Y. Cui, R. Li, G. Ma, Y. Zhang and L. Wang, *Polymers (Basel)*, 2023, **15**, 3148.
- 254 X. Hou, R. Wang, H. Zhang, M. Zhang, X. Qu and X. Hu, *Polymers (Basel)*, 2023, **15**, 3002.
- 255 Y. Huang, Z. Ding, Y. Li, F. Xi and J. Liu, *Molecules*, 2023, **28**, 4573.
- 256 Y. Luo, H. Luo, S. Zou, J. Jiang, D. Duan, L. Chen and L. Gao, *Sensors*, 2023, **23**, 3414.
- 257 B. Yan, Y. Yang, Y. Xie, J. Li and K. Li, *Chemistry (Easton)*, 2023, **5**, 1302–1316.
- 258 Y. Zhu, X. Fang, X. Lv, M. Lu, H. Xu, S. Hu, S. Zhao and F. Ye, *Biosensors*, 2023, **13**, 225.
- 259 X. Ma, T. Feng, P. Zhang, H. Zhang, X. Hu, Y. Yang, Z. Wang, H. Zhang, D. Peng, X. Li and J. Xu, *Foods*, 2023, **12**, 291.

- 260 B. Zhang, R. Zhou, H. Zhang, D. Cai, X. Lin, Y. Lang, Y. Qiu, X. Shentu, Z. Ye and X. Yu, *Foods*, 2022, **11**, 2900.
- 261 B. Wang, A. Moyano, J. M. Duque, L. Sánchez, G. García-Santos, L. J. G. Flórez, E. Serrano-Pertierra and M. D. C. Blanco-López, *Biosensors*, 2022, **12**, 490.
- 262 P. Khramtsov, M. Kropaneva, A. Minin, M. Bochkova, V. Timganova, A. Maximov, A. Puzik, S. Zamorina and M. Rayev, *Nanomaterials*, 2022, **12**, 1630.
- 263 P. Khramtsov, M. Kropaneva, M. Bochkova, V. Timganova, D. Kiselkov, S. Zamorina and M. Rayev, *Colloids and Interfaces*, 2022, **6**, 29.
- 264 Z. Zhu, L. Gong, X. Miao, C. Chen and S. Su, *Biosensors*, 2022, **12**, 260.
- 265 K. V. Serebrennikova, N. S. Komova, A. N. Berlina, A. V. Zherdev and B. B. Dzantiev, *Chemosensors*, 2021, **9**, 332.
- 266 X. Xie, L. Tan, S. Liu, X. Wen, T. Li and M. Yang, *J. Immunol. Methods*, 2021, **499**, 113167.
- 267 Y. Li, L. Wang, Z. Cui, S. Liu, S. Wang, J. Ren, Y. Tian, R. Shu, X. Luo, Y. Liao, J. Wang and D. Zhang, *Sensors Actuators B Chem.*, 2022, **364**, 131909.
- 268 A. Li, L. Long, F. Liu, J. Liu, X. Wu and Y. Ji, *J. Biol. Eng.*, 2019, **13**, 87.
- 269 D. Duan, K. Fan, D. Zhang, S. Tan, M. Liang, Y. Liu, J. Zhang, P. Zhang, W. Liu, X. Qiu, G. P. Kobinger, G. Fu Gao and X. Yan, *Biosens. Bioelectron.*, 2015, **74**, 134–141.
- 270 X. Zhang, W. Sun and Y. Cheng, *Chem. Pap.*, 2022, **76**, 3077–3085.
- 271 J. Xie, M.-Q. Tang, J. Chen, Y.-H. Zhu, C.-B. Lei, H.-W. He and X.-H. Xu, *Talanta*, 2020, **217**, 121070.
- 272 Y. Wang, T. Bu, Y. Cao, H. Wu, J. Xi, Q. Feng, C. Xuan and L. Wang, *Anal. Chem.*, 2023, **95**, 9237–9243.
- 273 F. Arshad, S. Nurul Azian Zakaria and M. Uddin Ahmed, *Food Chem.*, 2024, **438**, 137947.
- 274 H. Fang, S. Zhan, L. Feng, X. Chen, Q. Guo, Y. Guo, Q. He and Y. Xiong, *Sensors Actuators B Chem.*, 2021, **346**, 130368.
- 275 T. Jiang, Y. Song, T. Wei, H. Li, D. Du, M.-J. Zhu and Y. Lin, *Biosens. Bioelectron.*, 2016, **77**, 687–694.
- 276 Q. Guo, X. Huang, Y. Huang, Z. Zhang, P. Li and L. Yu, *J. Food Compos. Anal.*, 2024, **125**, 105795.
- 277 X. Wang, Y. Chen, R. Yu, R. Wang and Z. Xu, *Food Agric. Immunol.*, 2021, **32**, 592–605.
- 278 R. Li, H. Fan, H. Zhou, Y. Chen, Q. Yu, W. Hu, G. L. Liu and L. Huang, *Adv. Sci.*, 2023, **10**, 1–14.
- 279 H. Yan, Y. Chen, L. Jiao, W. Gu and C. Zhu, *Sensors Actuators B Chem.*, 2021, **341**, 130007.
- 280 I. M. Khoris, T. Kenta, A. B. Ganganboina and E. Y. Park, *Biosens. Bioelectron.*, 2022, **215**, 114602.
- 281 J. Kuang, J. Ju, Y. Lu, Y. Chen, C. Liu, D. Kong, W. Shen, H.-W. Shi, L. Li, J. Ye and S. Tang, *Food Chem.*, 2023, **416**, 135856.
- 282 P. Tripathi, A. Kumar, M. Sachan, S. Gupta and S. Nara, *Biosens. Bioelectron.*, 2020, **165**, 112368.

- 283 D. Wang, J. Wang, D. Liu, J. He, M. Wang, H. Huang, G. Nie, H. Ding and X. Yan, *Nano Res.*, 2023, 1–10.
- 284 S. K. Gurmessa, L. T. Tufa, J. Kim, K.-I. Lee, Y.-M. Kim, V. T. Tran, H.-Q. Nguyen, T. S. Shim, J. Kim, T. J. Park, J. Lee and H.-J. Kim, *ACS Appl. Nano Mater.*, 2021, **4**, 539–549.
- 285 J. Liu, Y. Xing, B. Xue and X. Zhou, *Biosens. Bioelectron.*, 2022, **205**, 114099.
- 286 X. Cai, Y. Luo, C. Zhu, D. Huang and Y. Song, *Sensors Actuators B Chem.*, 2022, **367**, 132066.
- 287 X. Wang, M. Zhang, X. Pang, K. Huang, Z. Yao, X. Mei and N. Cheng, *Talanta*, 2022, **247**, 123503.
- 288 Z. Xu, L. li Long, Y. qiu Chen, M. L. Chen and Y. H. Cheng, *Food Chem.*, 2021, **338**, 128039.
- 289 P. Khramtsov, M. Bochkova, V. Timganova, D. Kiselkov, S. Zamorina and M. Rayev, *ChemistrySelect*, 2022, **7**, 1–8.
- 290 P. Ivanova, M. Drozd, K. Michrowski, S. Karoń, M. Mazurkiewicz-Pawlicka and M. Pietrzak, *Biosens. Bioelectron.*, 2023, **237**, 115511.
- 291 A. Mohamad, N. A. Keasberry and M. U. Ahmed, *Anal. Sci.*, 2018, **34**, 1257–1263.
- 292 J. He, G. Liu, M. Jiang, L. Xu, F. Kong and Z. Xu, *Food Agric. Immunol.*, 2020, **31**, 341–351.
- 293 B. Liu, Z. Wu, C. Liang, J. Lu, J. Li, L. Zhang, T. Li, W. Zhao, Y. Fu, S. Hou, X. Tang and C. Li, *Front. Microbiol.*, 2021, **12**, 1–10.
- 294 L. Ding, X. Shao, M. Wang, H. Zhang and L. Lu, *Anal. Chim. Acta*, 2021, **1187**, 339171.
- 295 Z. Farka, V. Čunderlová, V. Horáčková, M. Pastucha, Z. Mikušová, A. Hlaváček and P. Skládal, *Anal. Chem.*, 2018, **90**, 2348–2354.
- 296 P. K. Gupta, S. E. Son and G. H. Seong, *Microchim. Acta*, 2021, **188**, 119.
- 297 L. Long, R. Cai, J. Liu and X. Wu, *Front. Chem.*, 2020, **8**, 1–9.
- 298 Z. Xi, W. Gao and X. Xia, *ChemBioChem*, 2020, **21**, 2440–2444.
- 299 H. Wang, C. Yao, J. Fan, Y. He and Z. Wang, *Biosens. Bioelectron.*, 2023, **237**, 115508.
- 300 C. Liang, B. Liu, J. Li, J. Lu, E. Zhang, Q. Deng, L. Zhang, R. Chen, Y. Fu, C. Li and T. Li, *Sensors Actuators B Chem.*, 2021, **349**, 130718.
- 301 N. Seddaoui, R. Attaallah and A. Amine, *Microchim. Acta*, 2022, **189**, 209.
- 302 R. Chen, X. Chen, Y. Zhou, T. Lin, Y. Leng, X. Huang and Y. Xiong, *ACS Nano*, 2022, **16**, 3351–3361.
- 303 M. Yan, G. Chen, Y. She, J. Ma, S. Hong, Y. Shao, A. M. Abd El-Aty, M. Wang, S. Wang and J. Wang, *J. Agric. Food Chem.*, 2019, **67**, 9658–9666.
- 304 A. Tarokh, A. B. Pebdeni, H. O. Othman, F. Salehnia and M. Hosseini, *Microchim. Acta*, 2021, **188**, 87.
- 305 L. Wang, T. Liao, H. Zhou, Y. Huang, P. Chen, X. Yang and X. Chen, *Anal. Biochem.*, 2021, **615**, 114068.
- 306 L. Zhao, J. Wang, D. Su, Y. Zhang, H. Lu, X. Yan, J. Bai, Y. Gao and G. Lu, *Nanoscale*, 2020, **12**,

- 19420–19428.
- 307 Y.-M. Wang, J.-W. Liu, G. B. Adkins, W. Shen, M. P. Trinh, L.-Y. Duan, J.-H. Jiang and W. Zhong, *Anal. Chem.*, 2017, **89**, 12327–12333.
- 308 Y. Tang, Y. Hu, P. Zhou, C. Wang, H. Tao and Y. Wu, *J. Agric. Food Chem.*, 2021, **69**, 2884–2893.
- 309 J. Y. Park, H. Y. Jeong, M. Il Kim and T. J. Park, *J. Nanomater.*, 2015, **2015**, 1–9.
- 310 Z. Dehghani, M. Hosseini, J. Mohammadnejad, B. Bakhshi and A. H. Rezayan, *Microchim. Acta*, 2018, **185**, 448.
- 311 N. Duan, W. Yang, S. Wu, Y. Zou and Z. Wang, *Food Anal. Methods*, 2020, **13**, 1433–1441.
- 312 S. Sun, R. Zhao, S. Feng and Y. Xie, *Microchim. Acta*, 2018, **185**, 535.
- 313 P. Weerathunge, B. K. Behera, S. Zihara, M. Singh, S. N. Prasad, S. Hashmi, P. R. D. Mariathomas, V. Bansal and R. Ramanathan, *Anal. Chim. Acta*, 2019, **1083**, 157–165.
- 314 Y. S. Kim and J. Jurng, *Sensors Actuators B Chem.*, 2013, **176**, 253–257.
- 315 J. Zhao, Y. Wu, H. Tao, H. Chen, W. Yang and S. Qiu, *RSC Adv.*, 2017, **7**, 38471–38478.
- 316 W. Yang, Y. Wu, H. Tao, J. Zhao, H. Chen and S. Qiu, *Anal. Methods*, 2017, **9**, 5484–5493.
- 317 R. Das, A. Dhiman, A. Kapil, V. Bansal and T. K. Sharma, *Anal. Bioanal. Chem.*, 2019, **411**, 1229–1238.
- 318 Z. Dehghani, T. Nguyen, M. Golabi, M. Hosseini, A. H. Rezayan, J. Mohammadnejad, A. Wolff and A. C. Vinayaka, *Food Control*, 2021, **121**, 107664.
- 319 J. Hu, P. Ni, H. Dai, Y. Sun, Y. Wang, S. Jiang and Z. Li, *Analyst*, 2015, **140**, 3581–3586.
- 320 J. Wang, C. Zhao, C. Hong, Z. Lin and Z. Huang, *J. Food Compos. Anal.*, 2021, **104**, 104162.
- 321 Z. Xiong, H. Zhong, S. Zheng, P. Deng, N. Li, W. Yun and L. Yang, *Anal. Methods*, 2018, **10**, 2450–2455.
- 322 L. Li, Y. Zhao, X. Yan, X. Qi, L. Wang, R. Ma, S. Wang and X. Mao, *Sensors Actuators B Chem.*, 2021, **344**, 130320.
- 323 S. Wu, N. Duan, Y. Qiu, J. Li and Z. Wang, *Int. J. Food Microbiol.*, 2017, **261**, 42–48.
- 324 L. Zhang, R. Huang, W. Liu, H. Liu, X. Zhou and D. Xing, *Biosens. Bioelectron.*, 2016, **86**, 1–7.
- 325 S. Wang, W. Deng, L. Yang, Y. Tan, Q. Xie and S. Yao, *ACS Appl. Mater. Interfaces*, 2017, **9**, 24440–24445.
- 326 C. Wang, J. Qian, K. Wang, X. Yang, Q. Liu, N. Hao, C. Wang, X. Dong and X. Huang, *Biosens. Bioelectron.*, 2016, **77**, 1183–1191.
- 327 Z. Tao, L. Wei, S. Wu, N. Duan, X. Li and Z. Wang, *Anal. Biochem.*, 2020, **608**, 113844.
- 328 Z. Tao, Y. Zhou, N. Duan and Z. Wang, *Catalysts*, 2020, **10**, 600.
- 329 G. Chen, M. Jin, M. Yan, X. Cui, Y. Wang, W. Zheng, G. Qin, Y. Zhang, M. Li, Y. Liao, X. Zhang, F. Yan, A. M. Abd El-Aty, A. Hacimüftüoğlu and J. Wang, *Microchim. Acta*, 2019, **186**, 339.

- 330 H. Zhang, S. Yao, X. Song, K. Xu, J. Wang, J. Li, C. Zhao and M. Jin, *Talanta*, 2021, **232**, 122448.
- 331 Y. Guo, L. Yan, R. Zhang, H. Ren and A. Liu, *Process Biochem.*, 2019, **81**, 92–98.
- 332 J. Hong, Z. Guo, D. Duan, Y. Zhang, X. Chen, Y. Li, Z. Tu, L. Feng, L. Chen, X. Yan, L. Gao, M. Liang and D. Duan, *Nano Res.*, , DOI:10.1007/s12274-023-6012-4.
- 333 M. Tian, W. Xie, T. Zhang, Y. Liu, Z. Lu, C. M. Li and Y. Liu, *Sensors Actuators B Chem.*, 2020, **309**, 127728.
- 334 J. Sun, C. Li, Y. Qi, S. Guo and X. Liang, *Sensors*, 2016, **16**, 584.
- 335 H. Liao, L. Hu, Y. Zhang, X. Yu, Y. Liu and R. Li, *Microchim. Acta*, 2018, **185**, 143.
- 336 Z. Huang, B. Liu and J. Liu, *Nanoscale*, 2020, **12**, 22467–22472.
- 337 N. Cheng, C. Zhu, Y. Wang, D. Du, M. J. Zhu, Y. Luo, W. Xu and Y. Lin, *J. Anal. Test.*, 2019, **3**, 99–106.
- 338 N. Cheng, Y. Song, M. M. A. Zeinhom, Y. C. Chang, L. Sheng, H. Li, D. Du, L. Li, M. J. Zhu, Y. Luo, W. Xu and Y. Lin, *ACS Appl. Mater. Interfaces*, 2017, **9**, 40671–40680.
- 339 S. P. Mulvaney, D. A. Kidwell, J. N. Lanese, R. P. Lopez, M. E. Sumera and E. Wei, *Sens. Bio-Sensing Res.*, 2020, 100390.
- 340 L. Huang, D. D. Gurav, L. Huang, D. D. Gurav, S. Wu, W. Xu, V. Vedarethinam and J. Yang, *Matter*, 2019, **1**, 1669–1680.
- 341 M. Mao, F. Sun, J. Wang, X. Li, Q. Pan, C. Peng and Z. Wang, *Sensors Actuators B Chem.*, 2023, **385**, 133720.
- 342 M. Mao, X. Chen, Y. Cai, H. Yang, C. Zhang, Y. Zhang, Z. Wang and C. Peng, *Sensors Actuators B Chem.*, 2023, **378**, 133148.
- 343 X. Meng, W. Zuo, P. Wu, Y. Song, G.-J. Yang, S. Zhang, J. Yang, X. Zou, W. Wei, D. Zhang, J. Dai and Y. Ju, *Nano Lett.*, 2024, **24**, 51–60.
- 344 C. Zhang, J. Hu, X. Wu, J. Shi and B. D. Hammock, *ACS Agric. Sci. Technol.*, 2022, **2**, 573–579.
- 345 D. Liu, C. Ju, C. Han, R. Shi, X. Chen, D. Duan, J. Yan and X. Yan, *Biosens. Bioelectron.*, 2021, **173**, 112817.
- 346 V. G. Panferov, I. V. Safenkova, A. V. Zherdev and B. B. Dzantiev, *Microchim. Acta*, 2020, **187**, 268.
- 347 L. Luo, X. Guo, X. Xi, T. Bao, Y. Li, Z. Wu, X. Zhang, S. Wang and W. Wen, *Sensors Actuators B Chem.*, 2023, **381**, 133444.
- 348 W. Li, Z. Wang, X. Wang, L. Cui, W. Huang, Z. Zhu and Z. Liu, *J. Environ. Chem. Eng.*, 2023, **11**, 110494.
- 349 F. D. Nicklen, A. J. Diaz, J. Lu, S. T. Patel, E. M. Zheng, V. R. Campbell, B. M. Wu and D. T. Kamei, *Anal. Bioanal. Chem.*, 2022, **414**, 7949–7956.
- 350 Z. Du, Y. Wang, D. He, E. Xu, Q. Chai, Z. Jin, Z. Wu and B. Cui, *Food Chem.*, 2022, **397**, 133756.
- 351 X. Pan, D. Shi, Z. Fu and H. Shi, *Food Chem.*, 2023, **428**, 136774.

- 352 D. Shi and H. Shi, *LWT*, 2022, **154**, 112641.
- 353 S. E. Son, S. H. Cheon, W. Hur, H. B. Lee, D. H. Kim, C. H. Ha, S. J. Lee, D. K. Han and G. H. Seong, *Biosens. Bioelectron.*, 2024, **243**, 115752.
- 354 T. Bai, L. Wang, M. Wang, Y. Zhu, W. Li, Z. Guo and Y. Zhang, *Biosens. Bioelectron.*, 2022, **208**, 114218.
- 355 L. Dou, Y. Bai, M. Liu, S. Shao, H. Yang, X. Yu, K. Wen, Z. Wang, J. Shen and W. Yu, *Biosens. Bioelectron.*, 2022, **204**, 114093.
- 356 Y. Chen, M. Zhang, X. Wang, X. Wang, Z. Majid, K. Huang, W. Xu, Y. Luo and C. Nan, *Sensors Actuators B Chem.*, 2023, **383**, 133601.
- 357 Q. He, H. Yang, Y. Chen, D. Shen, X. Cui, C. Zhang, H. Xiao, S. A. Eremin, Y. Fang and S. Zhao, *J. Pharm. Biomed. Anal.*, 2020, **187**, 113317.
- 358 D. W. Bradbury, M. Azimi, A. J. Diaz, A. A. Pan, C. H. Falktoft, B. M. Wu and D. T. Kamei, *Anal. Chem.*, 2019, **91**, 12046–12054.
- 359 J. Ren, X. Yin, H. Hu, S. Wang, Y. Tian, Y. Chen, Y. Li, J. Wang and D. Zhang, *Sensors Actuators B Chem.*, 2022, **367**, 132150.
- 360 X. Jin, L. Chen, Y. Zhang, X. Wang and N. Zhou, *Analyst*, 2021, **146**, 3608–3616.
- 361 M. S. Kim, S. H. Kweon, S. Cho, S. S. A. An, M. Il Kim, J. Doh and J. Lee, *ACS Appl. Mater. Interfaces*, 2017, **9**, 35133–35140.
- 362 S. Lin, D. Zheng, A. Li and Y. Chi, *Anal. Bioanal. Chem.*, 2019, **411**, 4063–4071.
- 363 J. Zhang, Q. Yu, W. Qiu, K. Li, L. Qian, X. Zhang and G. Liu, *Microchim. Acta*, 2019, **186**, 357.
- 364 C. N. Loynachan, M. R. Thomas, E. R. Gray, D. A. Richards, J. Kim, B. S. Miller, J. C. Brookes, S. Agarwal, V. Chudasama, R. A. McKendry and M. M. Stevens, *ACS Nano*, 2018, **12**, 279–288.
- 365 S. Cho, S. M. Lee, H. Y. Shin, M. S. Kim, Y. H. Seo, Y. K. Cho, J. Lee, S. P. Lee and M. Il Kim, *Analyst*, 2018, **143**, 1182–1187.
- 366 C. F. Peng, N. Pan, Q. Zhi-Juan, X. L. Wei and G. Shao, *Talanta*, 2017, **175**, 114–120.
- 367 Z. Gao, H. Ye, D. Tang, J. Tao, S. Habibi, A. Minerick, D. Tang and X. Xia, *Nano Lett.*, 2017, **17**, 5572–5579.
- 368 Z. Wei, K. Luciano and X. Xia, *ACS Nano*, 2022, **16**, 21609–21617.
- 369 D. Yang, L. Wang, T. Jia, T. Lian, K. Yang, X. Li, X. Wang and C. Xue, *Anal. Methods*, 2023, **15**, 663–674.
- 370 L. Kong, D. Chen, X. Zhang, L. Zhou, Y. Deng and S. Wei, *ACS Appl. Nano Mater.*, 2023, **6**, 3618–3626.
- 371 Z. Gao, M. Xu, M. Lu, G. Chen and D. Tang, *Biosens. Bioelectron.*, 2015, **70**, 194–201.
- 372 X. Lai, G. Zhang, L. Zeng, X. Xiao, J. Peng, P. Guo, W. Zhang and W. Lai, *ACS Appl. Mater. Interfaces*, 2021, **13**, 1413–1423.



- 373 Y. Chen, J. Ren, X. Yin, Y. Li, R. Shu, J. Wang and D. Zhang, *Anal. Chem.*, 2022, **94**, 8693–8703.
- 374 H. Ye, K. Yang, J. Tao, Y. Liu, Q. Zhang, S. Habibi, Z. Nie and X. Xia, *ACS Nano*, 2017, **11**, 2052–2059.
- 375 O. D. Hendrickson, E. A. Zvereva, S. M. Pridvorova, B. B. Dzantiev and A. V Zherdev, *Food Control*, 2023, **154**, 110013.
- 376 J. Hu, F. Tang, L. Wang, M. Tang, Y. Jiang and C. Liu, *Sensors Actuators B Chem.*, 2021, **346**, 130560.
- 377 O. Adeniyi, S. Sicwetsha, A. Adesina and P. Mashazi, *Talanta*, 2021, **226**, 122127.
- 378 G. Chen, M. Jin, J. Ma, M. Yan, X. Cui, Y. Wang, X. Zhang, H. Li, W. Zheng, Y. Zhang, A. M. Abd El-Aty, A. Hacımüftüoğlu and J. Wang, *J. Agric. Food Chem.*, 2020, **68**, 660–668.
- 379 Y. Hsu, N. Li, Y. Chen, H. Pang, K. Wei and H. Yang, *Biosens. Bioelectron.*, 2020, **151**, 111960.
- 380 X. Wu, T. Chen, Y. Chen and G. Yang, *J. Mater. Chem. B*, 2020, **8**, 2650–2659.
- 381 C. Zheng, A. Zheng, B. Liu, X. Zhang, Y. He, J. Li, H.-H. Yang and G. Chen, *Chem. Commun.*, 2014, **50**, 13103–13106.
- 382 M. Broto, M. M. Kaminski, C. Adrianus, N. Kim, R. Greensmith, S. Dissanayake-Perera, A. J. Schubert, X. Tan, H. Kim, A. S. Dighe, J. J. Collins and M. M. Stevens, *Nat. Nanotechnol.*, 2022, **17**, 1120–1126.
- 383 M. Rokni, T. Rohani Bastami, Z. Meshkat, H. Reza Rahimi, S. Zibaee, M. Meshkat, F. Fotouhi, E. Serki, M. Khoshakhlagh and Z. Dabirifar, *Microchim. Acta*, 2024, **191**, 36.
